# Supplementary material
Source: Research Square preprint supplement (doi:10.21203/rs.3.rs-9436157/v1)
Supplement: Supplementary file 1 [file 44b8a9d123622718426f6b57.docx]

**From Psychological Distress to Multi-System Morbidity: A Transdiagnostic Internalizing Factor Predicts Chronic Disease Onset**

Yini He1,2,3#, Tian Gao2,4#, Xiya Liu4, Jiahong Wang5, Junxing Xian2,3, Yingjie Peng2, Fengqian Xiao2, Yan Yan6, Lei Wang6, Kaixin Li2, Changsheng Dong2, Shangzheng Huang2, Xiaohan Tian3, Chaoyue Ding7, Qi Li4, Yuheng Huang1, Bing Liu3,8,9*, Jing Xiao1*, Ang Li2*

1. College of Education, Capital Normal University, Beijing 100048, China.

2. State Key Laboratory of Cognitive Science and Mental Health, Institute of Biophysics, Chinese Academy of Sciences, Beijing 100101, China.

3. State Key Laboratory of Cognitive Neuroscience and Learning, Beijing Normal University, Beijing 100091, China.

4. Beijing Key Laboratory of Learning and Cognition, School of Psychology, Capital Normal University, Beijing 100048, China.

5. Health Management Institute, The Second Medical Center & National Clinical Research Center for Geriatric Diseases, Chinese PLA General Hospital, Beijing 100853, China

6. Shenzhen Institutes of Advanced Technology, Chinese Academy of Sciences, Shenzhen, Guangdong 518066, China.

7. Brainnetome Center and National Laboratory of Pattern Recognition, Institute of Automation, Chinese Academy of Sciences, Beijing 100190, China

8. IDG/McGovern Institute for Brain Research, Beijing Normal University, Beijing 100091, China.

9. Chinese Institute for Brain Research, Beijing 102206, China.

*Corresponding author: [al@ibp.ac.cn;](file:///C:\Users\minnie\Downloads\al@ibp.ac.cn) [xiaojingcnu@163.com](mailto:xiaojingcnu@163.com); [bing.liu@bnu.edu.cn.](mailto:bing.liu@bnu.edu.cn.)

These authors contributed equally: Yini He, Tian Gao.

**Supplementary Table 1. Sample sizes used in different analyses.
Supplementary Table 2. Factor structure of internalizing disorders at baseline (2006–2010).
Supplementary Table 3. Fit indices of the factor structure across four time points.
Supplementary Table 4. Factor structure of internalizing disorders at instance 1 (2012–2013).
Supplementary Table 5. Factor structure of internalizing disorders at instance 2 (2014–2020).**

**Supplementary Table 6. Factor structure of internalizing disorders at instance 3 (2019+).**

**Supplementary Table 7. Prospective association between the transdiagnostic internalizing factor and 28 chronic diseases.**

**Supplementary Table 8. Difference in age at onset between the top and bottom groups.
Supplementary Table 9. Prospective associations between the transdiagnostic internalizing factor and chronic diseases across six systems.**

**Supplementary Table 10. Association between the transdiagnostic internalizing factor (at baseline) and brain gray matter volume in ROI-based analyses.
Supplementary Table 11. Association between the transdiagnostic internalizing factor (at imaging visit) and brain gray matter volume in ROI-based analyses.****Supplementary Table 12. Association between the multimorbidity measure and brain gray matter volume in ROI-based analyses.
Supplementary Table 13. Association between the transdiagnostic internalizing factor (at baseline) and biomarkers of the cardiovascular, metabolic, immune, respiratory, and musculoskeletal systems.
Supplementary Table 14. Association between the transdiagnostic internalizing factor (at imaging visit) and biomarkers of the cardiovascular and musculoskeletal systems.
Supplementary Table 15. Association between the** **multimorbidity measure and biomarkers of the cardiovascular, metabolic, immune, respiratory, and musculoskeletal systems.
Supplementary Table 16. Mediation effects of biomarkers on the associations between the internalizing factor and chronic diseases across six systems.
Supplementary Table 17. Variables used to assess internalizing symptoms.
Supplementary Table 18. List of 28 chronic diseases and corresponding ICD-10 codes.
Supplementary Table 19. Age at onset and sex distribution across 28 chronic diseases.**

**Supplementary Fig. 1. Brain structure associations with the transdiagnostic internalizing factor and the multimorbidity measure.
Supplementary Fig. 2. Association between the multimorbidity measure and multiple system biomarkers.
Supplementary Fig. 3. Score distributions for internalizing symptom items.**

**Supplementary Methods.**

**Cardiovascular MRI data**

**Preprocessing and Quality Control**

The short-axis images have an in-plane resolution of 1.8×1.8 mm², a slice thickness of 8.0 mm, and an inter-slice gap of 2 mm. The long-axis images also have an in-plane resolution of 1.8×1.8 mm² but consist of a single slice. Each cardiac cycle is composed of 50 temporal frames. Both short-axis and long-axis views use balanced steady-state free precession (bSSFP) magnitude images for analysis1. Initially, CMR DICOM images were converted into NIfTI format. Manual annotations of the images were performed using cvi software2, following standard operating procedures by multiple trained investigators. The endocardial and epicardial boundaries of the short-axis and long-axis images were manually traced at the end-diastolic (ED) and end-systolic (ES) time frames. Images with missing slices or anatomical structures, as well as those not fully covering both ED and ES frames, were excluded from the analysis.

**Short-axis and Long-axis image analysis**

Automated cardiovascular magnetic resonance (CMR) image analysis was performed using a fully convolutional network (FCN) architecture. The model was trained on CMR image data, learning image features from fine to coarse scales through a series of convolutions, iteratively predicting pixel-wise labels to perform pixel-level image segmentation. Separate networks were trained for short-axis, long-axis two-chamber (2Ch), and four-chamber (4Ch) images.

For short-axis cine image analysis, we utilized FCN for segmentation of the left ventricle (LV), right ventricle (RV), and myocardium, trained on manual annotations from 3,975 participants. From these segmented images, the left ventricular stroke volume (LVSV) and right ventricular stroke volume (RVSV) volumes over the entire cardiac cycle were directly obtained. This process facilitated the calculation of key metrics for both ventricles, including end-diastolic volume (LVEDV), end-systolic volume (LVESV), stroke volume (SV), ejection fraction (EF), left ventricular cardiac output per minute (LVCO), and left ventricular myocardial mass (LVM).

Furthermore, the myocardial contours were divided into 16 segments according to the model defined by the American Heart Association (AHA). By utilizing the myocardial contours at the ED frame and combining them with the average displacement field information from the ED frame to any other time point within the cardiac cycle, the myocardial contours from the ED frame were mapped to every time frame across the cardiac cycle. This process derived the myocardial contours at each time point within the cardiac cycle and was used to calculate the average wall thickness for each segment, the overall mean wall thickness, and the circumferential and radial strains for each segment as well as the global circumferential and radial strains.

For long-axis image analysis, two models were established for the two-chamber (2Ch) and four-chamber (4Ch) long-axis images, respectively. The model for the 2Ch images was trained using data from 3,823 participants, while the model for the 4Ch images was based on data from 3,782 participants. The atrial area (Area) and longitudinal diameter (L) for both atria were measured and segmented from the 4Ch images. Right atrial volume was calculated from the 4Ch cine view, while left atrial volume was calculated using measurements from both the 4Ch and 2Ch views.

Further, the myocardial contours were divided into six segments, and longitudinal strain as well as global peak strain were computed using the same motion tracking method as for the short-axis images.

**Aortic image analysis**

This study utilized a spatiotemporal neural network for image sequence segmentation, which combines a FCN with a Recurrent Neural Network (RNN) to integrate both spatial and temporal information into the segmentation task3. Using this spatiotemporal neural network, we segmented the maximal and minimal cross-sectional areas of the ascending aorta (AAo) and descending aorta (DAo). Aortic distensibility for the AAo and DAo was calculated using the following formula:

**,** where and represent the maximal and minimal cross-sectional areas of the aorta, respectively, and andrepresent central systolic and diastolic pressures.

**Symptom-level modeling**

To identify the best-fitting model for the data and extract the shared dimensions of various internalizing symptoms, we employed a data-driven approach to develop a bi-factor model. The Bi-Geomin rotation bi-factor exploratory structural equation modeling (Bi-ESEM) approach, which combines exploratory factor analysis and structural equation modeling, was used. This method ensures orthogonality between the general factor and specific factors, while allowing for some correlation among the specific factors4.

The model is defined as follows:

The Bi-ESEM approach proposed by Jennrich allows for exploratory factor analysis using a bi-factor rotation criterion without requiring a predefined initial factor structure. However, this method adheres to the bi-factor rotation criterion, enabling orthogonality between general and specific factors. Subsequently, researchers may opt for orthogonal rotation to ensure orthogonality among specific factors or oblique rotation to maintain orthogonality between general and specific factors only. This study employs BI-GEOMIN rotation, an oblique rotation method that does not restrict the correlation between the specific factors for nerves, worry, and depression.

A more detailed explanation of the bi-factor rotation criterion is as follows: If for all and whenever has a bi-factor structure, then is a bi-factor rotation criterion. Here, refers to an arbitrary loading matrix, where denotes the row (item number) and denotes the column (factor number). If is an initial loading matrix and is a loading matrix that minimizes over all rotations of , then is called a bi-factor rotation of .

The fundamental idea behind BI-GEOMIN rotation is: Given a factor loading matrix , where represents the loading of the observed variable on the factor, the goal of BI-GEOMIN rotation is to minimize the following objective function through the rotation of the factor loading matrix:

,

In the context of BI-GEOMIN rotation, represents the number of items (or observed variables), is the number of factors, and refers to the loading of the observed variable on the factor within the factor loading matrix. The constants and are key parameters of the rotation criterion, where controls the penalty for high loadings, and influences the relative independence between factors. In BI-GEOMIN rotation practice, it's common to choose as parameter values. This approach is designed to enhance the penalty on high loadings, promoting a more concentrated distribution of factor loadings on fewer variables while maintaining orthogonality between general and specific factors.

Specifically, this study applies a variation of the aforementioned fundamental principles:

,

The meanings of remain unchanged, while represents a small constant introduced to ensure numerical stability, ensuring that the formula can still function properly when loadings are very small (close to zero).

**Supplementary Table 1. Sample sizes used in different analyses.**

| **Symptom-level modeling of internalizing disorders** | | |
| --- | --- | --- |
| **Analysis** | **Variables** | **Sample Size** |
| Applied the Bi-ESEM method to construct the factor model at baseline. | The PHQ-4, EPQ-N, and sleep quality questionnaires were administered at instance 0 (2006-2010). | N = 158,435 |
| Applied the Bi-ESEM method to construct the factor model at the second time point. | The PHQ-4, EPQ-N, and sleep quality questionnaires were administered at instance 1 (2012-2013). | N = 5,040 |
| Applied the Bi-ESEM method to construct the factor model at the third time point. | The PHQ-4, EPQ-N, and sleep quality questionnaires were administered at instance 2 (2014-2020). | N = 17,229 |
| Applied the Bi-ESEM method to construct the factor model at the fourth time point. | The PHQ-4, EPQ-N, and sleep quality questionnaires were administered at instance 3 (2019+). | N = 1,737 |
| **Prospective correlation between internalizing factor and chronic diseases** | | |
| **Analysis** | **Variables** | **Sample Size** |
| Cox regression analysis between the transdiagnostic internalizing factor and 28 chronic diseases. | Factor score at baseline, disease status and onset date of 28 diseases, and covariates (age, sex, TDI, qualification, smoking status, and drinking frequency) | N = 140,902 |
| Cox regression analysis between the transdiagnostic internalizing factor and 6 systemic chronic diseases. | Factor score at baseline, disease status and onset date of 6 systemic disease, and covariates (age, sex, TDI, qualification, smoking status, and drinking frequency) | N = 140,902 |
| Age difference of first occurrence in 21 diseases between high and low groups. | Factor score at baseline, disease status and onset date of 21 diseases, disease first occurrence age. | N = 65,960 |
| Difference in cumulative incidence of 6 systemic diseases between high and low groups. | Factor score at baseline, disease status and onset date of 6 systemic diseases, disease first occurrence age. | N = 65,960 |
| **Association between internalizing factor and biological indicators** | | |
| **Analysis** | **Variables** | **Sample Size** |
| General linear regression between the factor and brain grey matter volume | Factor score at baseline, T1 structural brain MRI, and covariates (age, sex, TDI, educational qualification, smoking status, drinking frequency, head size, site information, and scanner bay location) | N = 9,089 |
| General linear regression between the factor and cardiovascular indicators | Factor score at baseline, heart MRI imaging, and covariates (age, sex, TDI, educational qualification, smoking status, and drinking frequency) | N = 14,288 |
| General linear regression between the factor and immune indicators | Factor score at baseline, blood cell count, blood biochemistry, and covariates (age, sex, TDI, educational qualification, smoking status, and drinking frequency) | N = 129,415 |
| General linear regression between the factor and metabolic indicators | Factor score at baseline, blood biochemistry, NMR metabolomic data, and covariates (age, sex, TDI, educational qualification, smoking status, and drinking frequency) | N = 92,177 |
| General linear regression between the factor and respiratory indicators | Factor score at baseline, spirometry data, and covariates (age, sex, TDI, educational qualification, smoking status, and drinking frequency) | N = 132,319 |
| General linear regression between the factor and musculoskeletal indicators | Factor score at baseline, physical measures, blood biochemistry, and covariates (age, sex, TDI, educational qualification, smoking status, and drinking frequency) | N = 65,832 |
| General linear regression between the factor and musculoskeletal indicators | Factor score at baseline, abdominal MRI (muscle-related), and covariates (age, sex, TDI, educational qualification, smoking status, and drinking frequency) | N = 7,998 |
| **Mediation analyses** | | |
| **Analysis** | **Variables** | **Sample Size** |
| Mediation analysis with grey matter volume as the moderator | Factor score at baseline, T1 structural brain MRI, and covariates (age, sex, TDI, educational qualification, smoking status, drinking frequency, head size, site information, and scanner bay location) | N = 9,098 |
| Mediation analysis with cardiac system indicators as the moderator | Factor score at baseline, heart MRI imaging, and covariates (age, sex, TDI, educational qualification, smoking status, and drinking frequency) | N = 14,288 |
| Mediation analysis with immune system indicators as the moderator | Factor score at baseline, blood cell count, blood biochemistry, and covariates (age, sex, TDI, educational qualification, smoking status, and drinking frequency) | N = 129,415 |
| Mediation analysis with metabolic system indicators as the moderator | Factor score at baseline, blood biochemistry, NMR metabolomic data, and covariates (age, sex, TDI, educational qualification, smoking status, and drinking frequency) | N = 92,177 |
| Mediation analysis with respiratory system indicators as the moderator | Factor score at baseline, spirometry data, and covariates (age, sex, TDI, educational qualification, smoking status, and drinking frequency) | N = 132,319 |
| Mediation analysis with musculoskeletal system indicators as the moderator | Factor score at baseline, physical measures, blood biochemistry, abdominal MRI (muscle-related), and covariates (age, sex, TDI, educational qualification, smoking status, and drinking frequency) | N = 65,832 |

Sample sizes used in each analysis of constructing factors, associating diseases and biomarkers, and mediation analyses.

**Supplementary Table 2. Factor structure of internalizing disorders at baseline (2006–2010).**

| **Item** | **Transdiagnostic internalizing factor** | **Nerves factor** | **Depression factor** | **Worry factor** |
| --- | --- | --- | --- | --- |
| Getting up in morning | 0.3 | -0.032 | 0.103 | 0.059 |
| Sleeplessness / insomnia | 0.275 | -0.018 | 0.058 | 0.118 |
| Mood swings | 0.735 | -0.099 | -0.116 | -0.12 |
| Miserableness | 0.663 | -0.141 | -0.053 | -0.01 |
| Irritability | 0.502 | 0.062 | -0.089 | -0.098 |
| Sensitivity / hurt feelings | 0.479 | -0.015 | -0.068 | 0.367 |
| Fed-up feelings | 0.698 | -0.13 | 0.004 | -0.05 |
| Nervous feelings | 0.446 | 0.579 | -0.041 | 0.049 |
| Worrier / anxious feelings | 0.497 | 0.168 | -0.056 | 0.294 |
| Tense / 'highly strung' | 0.472 | 0.377 | 0.036 | -0.054 |
| Worry too long after embarrassment | 0.429 | 0.013 | 0.004 | 0.54 |
| Suffer from 'nerves' | 0.399 | 0.48 | 0.036 | -0.005 |
| Loneliness, isolation | 0.457 | -0.02 | 0.208 | 0.057 |
| Guilty feelings | 0.466 | -0.004 | 0.088 | 0.3 |
| Frequency of depressed mood in last 2 weeks | 0.582 | -0.009 | 0.546 | -0.005 |
| Frequency of unenthusiasm / disinterest in last 2 weeks | 0.471 | -0.015 | 0.563 | -0.025 |
| Frequency of tenseness / restlessness in last 2 weeks | 0.523 | 0.145 | 0.386 | -0.02 |
| Frequency of tiredness / lethargy in last 2 weeks | 0.469 | -0.027 | 0.303 | 0.028 |

At baseline, the transdiagnostic internalizing factor structure extracted via Bi-ESEM is defined by items with loadings greater than 0.25.

**Supplementary Table 3. Fit indices of the factor structure across four time points.**

| **Time point** | **CFI** | **TLI** | **RMSEA (95% CI)** | **SRMR** |
| --- | --- | --- | --- | --- |
| Instance 0 | 0.97 | 0.958 | 0.04 (0.04, 0.041) | 0.019 |
| Instance 1 | 0.969 | 0.945 | 0.04 (0.037, 0.043) | 0.02 |
| Instance 2 | 0.973 | 0.953 | 0.039 (0.038, 0.040) | 0.019 |
| Instance 3 | 0.968 | 0.943 | 0.045 (0.040, 0.049) | 0.023 |

**Supplementary Table 4. Factor structure of internalizing disorders at instance 1 (2012–2013).**

| **Item** | **Transdiagnostic internalizing factor** | **Nerves factor** | **Depression factor** | **Worry factor** |
| --- | --- | --- | --- | --- |
| Getting up in morning | 0.287 | -0.043 | 0.137 | 0.1 |
| Sleeplessness / insomnia | 0.213 | -0.079 | 0.061 | 0.163 |
| Mood swings | 0.732 | -0.142 | -0.09 | -0.112 |
| Miserableness | 0.652 | -0.214 | -0.042 | -0.01 |
| Irritability | 0.492 | 0.046 | -0.121 | -0.109 |
| Sensitivity / hurt feelings | 0.491 | -0.011 | -0.07 | 0.392 |
| Fed-up feelings | 0.691 | -0.144 | 0.055 | -0.04 |
| Nervous feelings | 0.459 | 0.499 | -0.04 | 0.115 |
| Worrier / anxious feelings | 0.485 | 0.098 | -0.042 | 0.374 |
| Tense / 'highly strung' | 0.459 | 0.386 | -0.001 | -0.104 |
| Worry too long after embarrassment | 0.426 | 0.018 | 0 | 0.51 |
| Suffer from 'nerves' | 0.4 | 0.479 | 0.05 | 0.002 |
| Loneliness, isolation | 0.428 | -0.034 | 0.202 | 0.036 |
| Guilty feelings | 0.435 | 0.005 | 0.076 | 0.283 |
| Frequency of depressed mood in last 2 weeks | 0.556 | -0.01 | 0.581 | -0.015 |
| Frequency of unenthusiasm / disinterest in last 2 weeks | 0.44 | 0.008 | 0.551 | -0.039 |
| Frequency of tenseness / restlessness in last 2 weeks | 0.484 | 0.138 | 0.354 | -0.016 |
| Frequency of tiredness / lethargy in last 2 weeks | 0.42 | -0.057 | 0.287 | 0.089 |

At second time point, the transdiagnostic internalizing factor structure extracted via Bi-ESEM is defined by items with loadings greater than 0.25.

**Supplementary Table 5. Factor structure of internalizing disorders at instance 2 (2014–2020).**

| **Item** | **Transdiagnostic internalizing factor** | **Nerves factor** | **Depression factor** | **Worry factor** |
| --- | --- | --- | --- | --- |
| Getting up in morning | 0.31 | -0.04 | 0.089 | 0.106 |
| Sleeplessness / insomnia | 0.246 | -0.034 | 0.158 | 0.032 |
| Mood swings | 0.746 | -0.064 | -0.094 | -0.118 |
| Miserableness | 0.687 | -0.12 | -0.044 | -0.068 |
| Irritability | 0.461 | 0.062 | -0.032 | -0.085 |
| Sensitivity / hurt feelings | 0.491 | 0.006 | 0.387 | -0.058 |
| Fed-up feelings | 0.72 | -0.12 | -0.064 | -0.008 |
| Nervous feelings | 0.427 | 0.599 | 0.045 | -0.038 |
| Worrier / anxious feelings | 0.48 | 0.175 | 0.298 | -0.069 |
| Tense / highly strung | 0.445 | 0.378 | -0.033 | 0.04 |
| Worry too long after embarrassment | 0.433 | -0.001 | 0.544 | 0.008 |
| Suffer from 'nerves' | 0.388 | 0.51 | -0.02 | 0.032 |
| Loneliness, isolation | 0.444 | -0.032 | 0.02 | 0.18 |
| Guilty feelings | 0.466 | 0.005 | 0.296 | 0.061 |
| Frequency of depressed mood in last 2 weeks | 0.604 | 0.018 | -0.031 | 0.521 |
| Frequency of unenthusiasm / disinterest in last 2 weeks | 0.518 | -0.021 | -0.027 | 0.594 |
| Frequency of tenseness / restlessness in last 2 weeks | 0.508 | 0.154 | 0.003 | 0.322 |
| Frequency of tiredness / lethargy in last 2 weeks | 0.481 | -0.049 | 0.087 | 0.296 |

At third time point, the transdiagnostic internalizing factor structure extracted via Bi-ESEM is defined by items with loadings greater than 0.25.

**Supplementary Table 6. Factor structure of internalizing disorders at instance 3 (2019+).**

| **Item** | **Transdiagnostic internalizing factor** | **Nerves factor** | **Depression factor** | **Worry factor** |
| --- | --- | --- | --- | --- |
| Getting up in morning | 0.319 | -0.081 | 0.081 | 0.074 |
| Sleeplessness / insomnia | 0.225 | -0.04 | 0.127 | 0.032 |
| Mood swings | 0.766 | -0.052 | -0.137 | -0.101 |
| Miserableness | 0.716 | -0.088 | -0.098 | -0.125 |
| Irritability | 0.455 | 0.086 | -0.038 | -0.045 |
| Sensitivity / hurt feelings | 0.497 | 0.04 | 0.353 | -0.083 |
| Fed-up feelings | 0.724 | -0.125 | -0.028 | 0.01 |
| Nervous feelings | 0.446 | 0.608 | 0.044 | -0.007 |
| Worrier / anxious feelings | 0.495 | 0.187 | 0.291 | -0.05 |
| Tense / 'highly strung' | 0.431 | 0.37 | -0.047 | 0.053 |
| Worry too long after embarrassment | 0.439 | -0.014 | 0.641 | 0.008 |
| Suffer from 'nerves' | 0.393 | 0.555 | -0.003 | -0.007 |
| Loneliness, isolation | 0.482 | 0.036 | 0.007 | 0.141 |
| Guilty feelings | 0.529 | -0.001 | 0.274 | 0.044 |
| Frequency of depressed mood in last 2 weeks | 0.619 | -0.01 | -0.013 | 0.533 |
| Frequency of unenthusiasm / disinterest in last 2 weeks | 0.534 | -0.007 | -0.02 | 0.625 |
| Frequency of tenseness / restlessness in last 2 weeks | 0.521 | 0.13 | -0.012 | 0.357 |
| Frequency of tiredness / lethargy in last 2 weeks | 0.486 | -0.078 | 0.07 | 0.286 |

At fourth time point, the transdiagnostic internalizing factor structure extracted via Bi-ESEM is defined by items with loadings greater than 0.25.

**Supplementary Table 7. Prospective association between the transdiagnostic internalizing factor and 28 chronic diseases.**

| **Disease** | **No. of Total** | **No. of cases** | **Hazard Ratio (HR)** | **HR Lower 95% CI** | **HR Upper 95% CI** | **P-value** | **FDR**  **P-value** |
| --- | --- | --- | --- | --- | --- | --- | --- |
| Irritable Bowel Syndrome | 140902 | 1664 | 1.48 | 1.42 | 1.55 | 2.14E-65 | 6.00E-64 |
| Parkinsonism | 140902 | 946 | 1.24 | 1.16 | 1.32 | 1.20E-10 | 3.37E-10 |
| COPD | 140902 | 1824 | 1.22 | 1.16 | 1.27 | 4.09E-17 | 1.43E-16 |
| Bronchiectasis | 140902 | 606 | 1.20 | 1.11 | 1.30 | 1.25E-05 | 2.91E-05 |
| Spinal disorders | 140902 | 4022 | 1.19 | 1.15 | 1.22 | 2.27E-27 | 2.12E-26 |
| Cirrhosis | 140902 | 403 | 1.18 | 1.08 | 1.30 | 8.07E-04 | 1.20E-03 |
| Dementia | 140902 | 3192 | 1.18 | 1.14 | 1.22 | 4.78E-19 | 2.23E-18 |
| Type II Diabetes | 140902 | 3068 | 1.17 | 1.13 | 1.21 | 9.30E-18 | 3.72E-17 |
| Obesity | 140902 | 4839 | 1.15 | 1.12 | 1.18 | 1.10E-21 | 7.72E-21 |
| Rheumatoid arthritis | 140902 | 722 | 1.14 | 1.06 | 1.22 | 8.11E-04 | 1.20E-03 |
| Psoriatic arthritis | 140902 | 621 | 1.12 | 1.03 | 1.21 | 6.66E-03 | 9.32E-03 |
| Ischemic heart disease | 140902 | 5289 | 1.12 | 1.09 | 1.15 | 1.31E-14 | 4.06E-14 |
| Anaemia | 140902 | 2593 | 1.11 | 1.07 | 1.15 | 2.95E-07 | 7.51E-07 |
| Heart failure | 140902 | 1403 | 1.11 | 1.05 | 1.17 | 4.22E-04 | 7.39E-04 |
| Hypertensive diseases | 140902 | 14270 | 1.10 | 1.08 | 1.12 | 8.23E-29 | 1.15E-27 |
| Multiple Sclerosis | 140902 | 130 | 1.10 | 0.93 | 1.30 | 3.13E-01 | 3.66E-01 |
| CKD | 140902 | 1767 | 1.10 | 1.04 | 1.15 | 3.44E-04 | 6.42E-04 |
| Osteoarthritis | 140902 | 12291 | 1.09 | 1.07 | 1.11 | 6.69E-21 | 3.75E-20 |
| Glaucoma | 140902 | 1991 | 1.09 | 1.04 | 1.14 | 3.44E-04 | 6.42E-04 |
| Osteoporosis | 140902 | 2295 | 1.09 | 1.04 | 1.14 | 1.85E-04 | 3.98E-04 |
| Eczema or Dermatitis | 140902 | 3869 | 1.06 | 1.03 | 1.10 | 4.54E-04 | 7.48E-04 |
| Atrial fibrillation | 140902 | 3986 | 1.05 | 1.01 | 1.08 | 7.08E-03 | 9.44E-03 |
| Colorectal Cancer | 140902 | 1424 | 1.05 | 0.99 | 1.11 | 1.12E-01 | 1.36E-01 |
| Prostate Cancer | 140902 | 2422 | 1.05 | 1.00 | 1.09 | 5.24E-02 | 6.66E-02 |
| Lung Cancer | 140902 | 612 | 1.02 | 0.94 | 1.11 | 6.85E-01 | 6.85E-01 |
| chronic enteritis | 140902 | 514 | 1.02 | 0.93 | 1.11 | 6.85E-01 | 6.85E-01 |
| Stroke | 140902 | 1493 | 1.01 | 0.96 | 1.07 | 6.85E-01 | 6.85E-01 |
| Breast Cancer | 140902 | 2606 | 0.99 | 0.95 | 1.03 | 6.85E-01 | 6.85E-01 |

The results are based on Cox regression analyses examining the prospective associations between baseline transdiagnostic internalizing factor scores and the incidence of 28 chronic diseases. The analyses controlled for basic covariates, including age, sex, TDI, qualifications, smoking status, and drinking frequency. Significance levels were adjusted using the FDR correction, with 21 diseases remaining significant after correction (*p* < 0.05). These 21 diseases were included in subsequent analyses.

**Supplementary Table 8. Difference in age at onset between the top and bottom groups.**

| **Disease** | **Number (High)** | **Number (Low)** | **Onset age (High)** | **Onset age (Low)** | **T-value** | **Diff.** | **P-value** | **FDR**  **P-value** |
| --- | --- | --- | --- | --- | --- | --- | --- | --- |
| Hypertensive diseases | 4049 | 3189 | 61.17 | 62.42 | -6.71 | 1.25 | 2.11E-11 | 4.43E-10 |
| Dementia | 937 | 658 | 61.6 | 64.17 | -5.83 | 2.57 | 6.75E-09 | 7.08E-08 |
| Osteoarthritis | 3244 | 2643 | 60.72 | 61.83 | -5.44 | 1.11 | 5.69E-08 | 3.99E-07 |
| Type II Diabetes | 1002 | 689 | 60.08 | 61.78 | -4.27 | 1.7 | 2.12E-05 | 1.10E-04 |
| Obesity | 1491 | 1028 | 57.81 | 59.15 | -4.21 | 1.34 | 2.63E-05 | 1.10E-04 |
| Spinal disorders | 1204 | 806 | 59.19 | 60.49 | -3.43 | 1.3 | 6.14E-04 | 2.15E-03 |
| Parkinsonism | 283 | 170 | 62.48 | 64.81 | -3.1 | 2.33 | 2.06E-03 | 6.18E-03 |
| Eczema or Dermatitis | 983 | 880 | 56.79 | 57.83 | -2.79 | 1.04 | 5.27E-03 | 1.15E-02 |
| Glaucoma | 498 | 465 | 62.51 | 63.92 | -2.78 | 1.41 | 5.50E-03 | 1.15E-02 |
| Cirrhosis | 118 | 88 | 58.4 | 61.49 | -2.78 | 3.09 | 6.01E-03 | 1.15E-02 |
| Ischemic heart disease | 1511 | 1188 | 61.51 | 62.33 | -2.76 | 0.82 | 5.84E-03 | 1.15E-02 |
| COPD | 722 | 398 | 63.05 | 63.93 | -1.89 | 0.88 | 5.85E-02 | 1.02E-01 |
| Heart failure | 406 | 291 | 63.23 | 64.29 | -1.8 | 1.06 | 7.23E-02 | 1.17E-01 |
| Anaemia | 724 | 518 | 59.22 | 60.1 | -1.75 | 0.88 | 8.07E-02 | 1.21E-01 |
| Atrial fibrillation | 987 | 941 | 63.66 | 64.15 | -1.5 | 0.49 | 1.34E-01 | 1.87E-01 |
| Bronchiectasis | 173 | 129 | 63.68 | 64.78 | -1.3 | 1.1 | 1.96E-01 | 2.57E-01 |
| Psoriatic arthritis | 178 | 155 | 58.3 | 59.13 | -0.95 | 0.83 | 3.41E-01 | 4.21E-01 |
| CKD | 501 | 399 | 63.6 | 63.97 | -0.72 | 0.37 | 4.70E-01 | 5.48E-01 |
| Rheumatoid arthritis | 200 | 147 | 60.72 | 61.06 | -0.39 | 0.34 | 6.97E-01 | 7.70E-01 |
| Irritable Bowel Syndrome | 607 | 185 | 57.46 | 57.62 | -0.23 | 0.16 | 8.17E-01 | 8.57E-01 |
| Osteoporosis | 583 | 476 | 63.99 | 63.92 | 0.18 | -0.07 | 8.57E-01 | 8.57E-01 |

For the 21 diseases significantly associated with the transdiagnostic internalizing factor, we examined whether the factor was linked to the age of disease onset. After stringent matching for gender and age, we calculated the differences in the age of first occurrence and corresponding t-values between the high-score and low-score groups. Among these, 11 diseases remained significant following FDR correction.

**Supplementary Table 9. Prospective associations between the transdiagnostic internalizing factor and chronic diseases across six systems.**

| **Disease** | **Sample number** | **Disease count** | **Hazard Ratio (HR)** | **HR Lower 95% CI** | **HR Upper 95% CI** | **P-value** | **FDR**  **P-value** |
| --- | --- | --- | --- | --- | --- | --- | --- |
| Respiratory diseases | 140902 | 2313 | 1.20 | 1.15 | 1.25 | 8.67E-19 | 1.04E-18 |
| Neurological diseases | 140902 | 3902 | 1.19 | 1.16 | 1.23 | 5.75E-28 | 8.63E-28 |
| Immune and inflammatory diseases | 140902 | 1317 | 1.13 | 1.07 | 1.20 | 5.01E-06 | 5.01E-06 |
| Miscellaneousdiseases | 140902 | 11355 | 1.13 | 1.11 | 1.15 | 1.56E-38 | 4.69E-38 |
| Cardiometabolic diseases | 140902 | 23681 | 1.10 | 1.09 | 1.12 | 4.77E-48 | 2.86E-47 |
| Musculoskeletal diseases | 140902 | 16613 | 1.10 | 1.08 | 1.12 | 3.67E-34 | 7.34E-34 |

The 21 diseases significantly associated with the transdiagnostic internalizing factor were categorized into six different physiological systems. First, we calculated the disease status (binary 0/1 variable) and duration for each systemic disease. Then, we examined the prospective associations between the baseline internalizing factor score and these systemic diseases, adjusting for six basic covariates: age, sex, TDI, qualifications, smoking status, and drinking frequency.

**Supplementary Table 10. Association between the transdiagnostic internalizing factor (at baseline) and brain gray matter volume in ROI-based analyses.**

| **Feature** | **Number** | **β** | **P-value** | **FDR P-value** |
| --- | --- | --- | --- | --- |
| BN_SFG_L_7_5 | 9089 | -1.42E-04 | 9.86E-01 | 9.98E-01 |
| BN_MVOcC_R_5_3 | 9089 | -2.84E-04 | 9.75E-01 | 9.98E-01 |
| BN_LOcC_R_4_2 | 9089 | -5.09E-04 | 9.54E-01 | 9.95E-01 |
| BN_PoG_L_4_4 | 9089 | -9.01E-04 | 9.22E-01 | 9.79E-01 |
| BN_SFG_R_7_1 | 9089 | -9.30E-04 | 9.09E-01 | 9.79E-01 |
| BN_MVOcC_L_5_1 | 9089 | -9.83E-04 | 9.11E-01 | 9.79E-01 |
| BN_STG_R_6_1 | 9089 | -1.05E-03 | 9.03E-01 | 9.79E-01 |
| BN_SFG_L_7_3 | 9089 | -1.20E-03 | 8.83E-01 | 9.79E-01 |
| BN_ITG_L_7_6 | 9089 | -1.25E-03 | 8.90E-01 | 9.79E-01 |
| BN_MVOcC_R_5_4 | 9089 | -1.28E-03 | 8.75E-01 | 9.79E-01 |
| BN_pSTS_L_2_1 | 9089 | -1.39E-03 | 8.87E-01 | 9.79E-01 |
| BN_SFG_R_7_2 | 9089 | -1.53E-03 | 8.60E-01 | 9.79E-01 |
| BN_PoG_L_4_1 | 9089 | -1.53E-03 | 8.59E-01 | 9.79E-01 |
| BN_SPL_R_5_4 | 9089 | -1.57E-03 | 8.70E-01 | 9.79E-01 |
| BN_INS_R_6_5 | 9089 | -1.59E-03 | 8.46E-01 | 9.78E-01 |
| BN_SFG_R_7_5 | 9089 | -1.80E-03 | 8.33E-01 | 9.78E-01 |
| BN_IPL_R_6_3 | 9089 | -1.90E-03 | 8.35E-01 | 9.78E-01 |
| BN_IFG_R_6_1 | 9089 | -2.02E-03 | 8.28E-01 | 9.78E-01 |
| BN_SFG_L_7_7 | 9089 | -2.08E-03 | 7.91E-01 | 9.58E-01 |
| BN_FuG_L_3_3 | 9089 | -2.08E-03 | 7.93E-01 | 9.58E-01 |
| BN_STG_R_6_5 | 9089 | -2.09E-03 | 8.08E-01 | 9.65E-01 |
| BN_LOcC_L_4_1 | 9089 | -2.35E-03 | 7.94E-01 | 9.58E-01 |
| BN_PoG_R_4_4 | 9089 | -2.36E-03 | 7.99E-01 | 9.58E-01 |
| BN_STG_L_6_1 | 9089 | -2.50E-03 | 7.75E-01 | 9.58E-01 |
| BN_PoG_L_4_2 | 9089 | -2.51E-03 | 7.65E-01 | 9.58E-01 |
| BN_CG_L_7_6 | 9089 | -2.82E-03 | 7.25E-01 | 9.35E-01 |
| BN_STG_R_6_4 | 9089 | -2.84E-03 | 7.44E-01 | 9.47E-01 |
| BN_LOcC_L_2_1 | 9089 | -3.11E-03 | 7.39E-01 | 9.44E-01 |
| BN_LOcC_L_4_3 | 9089 | -3.12E-03 | 7.15E-01 | 9.27E-01 |
| BN_STG_R_6_6 | 9089 | -3.20E-03 | 7.05E-01 | 9.17E-01 |
| BN_PrG_R_6_6 | 9089 | -3.39E-03 | 7.02E-01 | 9.17E-01 |
| Hypothalamus_right | 9089 | -3.62E-03 | 6.93E-01 | 9.08E-01 |
| BN_MFG_L_7_2 | 9089 | -3.66E-03 | 6.68E-01 | 8.87E-01 |
| BN_STG_L_6_4 | 9089 | -3.83E-03 | 6.62E-01 | 8.86E-01 |
| BN_Hipp_L | 9089 | -3.90E-03 | 6.18E-01 | 8.48E-01 |
| BN_SPL_L_5_1 | 9089 | -4.18E-03 | 6.54E-01 | 8.80E-01 |
| BN_MVOcC_L_5_5 | 9089 | -4.25E-03 | 6.42E-01 | 8.69E-01 |
| BN_MTG_R_4_4 | 9089 | -4.45E-03 | 5.75E-01 | 8.00E-01 |
| BN_IFG_R_6_3 | 9089 | -4.52E-03 | 6.33E-01 | 8.60E-01 |
| BN_STG_L_6_2 | 9089 | -4.87E-03 | 5.82E-01 | 8.06E-01 |
| BN_MTG_L_4_2 | 9089 | -4.98E-03 | 5.34E-01 | 7.66E-01 |
| BN_Hipp_R | 9089 | -5.23E-03 | 5.11E-01 | 7.53E-01 |
| BN_ITG_R_7_1 | 9089 | -5.30E-03 | 5.57E-01 | 7.84E-01 |
| BN_PoG_R_4_2 | 9089 | -5.33E-03 | 5.33E-01 | 7.66E-01 |
| BN_OrG_L_6_2 | 9089 | -5.47E-03 | 4.91E-01 | 7.35E-01 |
| BN_PoG_R_4_1 | 9089 | -5.67E-03 | 5.22E-01 | 7.64E-01 |
| BN_PhG_L_6_1 | 9089 | -5.79E-03 | 4.95E-01 | 7.35E-01 |
| BN_PoG_R_4_3 | 9089 | -5.81E-03 | 5.30E-01 | 7.66E-01 |
| BN_PCun_L_4_4 | 9089 | -6.02E-03 | 4.50E-01 | 7.09E-01 |
| BN_OrG_R_6_4 | 9089 | -6.19E-03 | 4.07E-01 | 6.94E-01 |
| BN_MTG_L_4_3 | 9089 | -6.24E-03 | 4.80E-01 | 7.34E-01 |
| BN_PhG_L_6_2 | 9089 | -6.24E-03 | 4.55E-01 | 7.09E-01 |
| BN_PrG_R_6_5 | 9089 | -6.34E-03 | 4.60E-01 | 7.13E-01 |
| BN_PrG_R_6_4 | 9089 | -6.49E-03 | 4.89E-01 | 7.35E-01 |
| BN_STG_L_6_6 | 9089 | -6.50E-03 | 4.34E-01 | 7.09E-01 |
| BN_FuG_R_3_1 | 9089 | -6.55E-03 | 3.82E-01 | 6.85E-01 |
| BN_MTG_L_4_4 | 9089 | -6.62E-03 | 4.31E-01 | 7.09E-01 |
| BN_IFG_L_6_2 | 9089 | -6.83E-03 | 4.45E-01 | 7.09E-01 |
| BN_IFG_R_6_4 | 9089 | -6.87E-03 | 4.28E-01 | 7.09E-01 |
| BN_PCun_R_4_4 | 9089 | -6.87E-03 | 3.99E-01 | 6.94E-01 |
| BN_IPL_R_6_4 | 9089 | -6.90E-03 | 4.41E-01 | 7.09E-01 |
| BN_IPL_L_6_5 | 9089 | -6.92E-03 | 4.18E-01 | 7.00E-01 |
| BN_SPL_L_5_2 | 9089 | -7.05E-03 | 4.45E-01 | 7.09E-01 |
| BN_MFG_L_7_5 | 9089 | -7.09E-03 | 3.80E-01 | 6.85E-01 |
| BN_IFG_R_6_6 | 9089 | -7.16E-03 | 4.49E-01 | 7.09E-01 |
| BN_SFG_L_7_1 | 9089 | -7.24E-03 | 3.98E-01 | 6.94E-01 |
| BN_PrG_L_6_1 | 9089 | -7.29E-03 | 4.11E-01 | 6.94E-01 |
| BN_CG_R_7_6 | 9089 | -7.32E-03 | 3.45E-01 | 6.58E-01 |
| BN_OrG_R_6_3 | 9089 | -7.34E-03 | 3.36E-01 | 6.57E-01 |
| BN_MVOcC_R_5_5 | 9089 | -7.38E-03 | 4.09E-01 | 6.94E-01 |
| BN_ITG_R_7_4 | 9089 | -7.63E-03 | 3.87E-01 | 6.85E-01 |
| Hypothalamus_left | 9089 | -7.72E-03 | 3.85E-01 | 6.85E-01 |
| BN_LOcC_L_2_2 | 9089 | -7.86E-03 | 4.09E-01 | 6.94E-01 |
| BN_INS_R_6_4 | 9089 | -8.04E-03 | 3.43E-01 | 6.58E-01 |
| BN_IPL_R_6_6 | 9089 | -8.04E-03 | 3.38E-01 | 6.57E-01 |
| BN_ITG_R_7_7 | 9089 | -8.13E-03 | 3.11E-01 | 6.34E-01 |
| BN_MFG_R_7_7 | 9089 | -8.20E-03 | 2.89E-01 | 6.09E-01 |
| BN_PhG_R_6_6 | 9089 | -8.29E-03 | 3.72E-01 | 6.78E-01 |
| BN_STG_R_6_2 | 9089 | -8.35E-03 | 3.38E-01 | 6.57E-01 |
| BN_LOcC_L_4_4 | 9089 | -8.35E-03 | 3.03E-01 | 6.25E-01 |
| BN_MVOcC_L_5_2 | 9089 | -8.40E-03 | 3.46E-01 | 6.58E-01 |
| BN_CG_R_7_5 | 9089 | -8.41E-03 | 3.57E-01 | 6.69E-01 |
| BN_LOcC_R_4_4 | 9089 | -8.45E-03 | 2.85E-01 | 6.09E-01 |
| BN_OrG_L_6_4 | 9089 | -8.47E-03 | 2.80E-01 | 6.09E-01 |
| BN_PCun_L_4_3 | 9089 | -8.53E-03 | 3.33E-01 | 6.57E-01 |
| BN_CG_R_7_4 | 9089 | -8.56E-03 | 2.84E-01 | 6.09E-01 |
| BN_STG_L_6_3 | 9089 | -8.60E-03 | 2.81E-01 | 6.09E-01 |
| BN_ITG_L_7_2 | 9089 | -8.72E-03 | 3.24E-01 | 6.52E-01 |
| BN_SFG_R_7_3 | 9089 | -8.84E-03 | 2.79E-01 | 6.09E-01 |
| BN_MFG_R_7_5 | 9089 | -8.88E-03 | 3.05E-01 | 6.25E-01 |
| BN_CG_L_7_2 | 9089 | -9.34E-03 | 3.41E-01 | 6.58E-01 |
| BN_PrG_R_6_3 | 9089 | -9.35E-03 | 3.12E-01 | 6.34E-01 |
| BN_SPL_R_5_3 | 9089 | -9.37E-03 | 3.30E-01 | 6.57E-01 |
| BN_PrG_R_6_2 | 9089 | -9.38E-03 | 3.01E-01 | 6.25E-01 |
| BN_FuG_R_3_2 | 9089 | -9.61E-03 | 2.07E-01 | 5.24E-01 |
| BN_MFG_L_7_1 | 9089 | -9.64E-03 | 2.48E-01 | 5.73E-01 |
| BN_MVOcC_R_5_1 | 9089 | -9.68E-03 | 2.54E-01 | 5.79E-01 |
| BN_ITG_R_7_5 | 9089 | -9.73E-03 | 2.69E-01 | 5.99E-01 |
| BN_STG_L_6_5 | 9089 | -9.74E-03 | 2.53E-01 | 5.79E-01 |
| BN_INS_L_6_2 | 9089 | -9.75E-03 | 2.61E-01 | 5.89E-01 |
| BN_MFG_L_7_4 | 9089 | -9.92E-03 | 2.40E-01 | 5.61E-01 |
| BN_IFG_R_6_2 | 9089 | -1.00E-02 | 2.64E-01 | 5.91E-01 |
| BN_CG_L_7_3 | 9089 | -1.03E-02 | 2.19E-01 | 5.35E-01 |
| BN_FuG_L_3_1 | 9089 | -1.05E-02 | 1.77E-01 | 4.77E-01 |
| BN_PrG_L_6_6 | 9089 | -1.05E-02 | 2.28E-01 | 5.49E-01 |
| BN_INS_L_6_6 | 9089 | -1.07E-02 | 2.15E-01 | 5.33E-01 |
| BN_STG_R_6_3 | 9089 | -1.09E-02 | 1.78E-01 | 4.77E-01 |
| BN_MTG_L_4_1 | 9089 | -1.10E-02 | 1.73E-01 | 4.77E-01 |
| BN_OrG_R_6_6 | 9089 | -1.11E-02 | 1.74E-01 | 4.77E-01 |
| BN_ITG_R_7_2 | 9089 | -1.13E-02 | 1.81E-01 | 4.77E-01 |
| BN_OrG_R_6_2 | 9089 | -1.15E-02 | 1.43E-01 | 4.36E-01 |
| BN_IFG_R_6_5 | 9089 | -1.15E-02 | 1.76E-01 | 4.77E-01 |
| BN_SPL_L_5_5 | 9089 | -1.19E-02 | 2.25E-01 | 5.43E-01 |
| BN_IFG_L_6_4 | 9089 | -1.20E-02 | 1.68E-01 | 4.77E-01 |
| BN_CG_L_7_5 | 9089 | -1.20E-02 | 1.70E-01 | 4.77E-01 |
| BN_IPL_L_6_1 | 9089 | -1.20E-02 | 1.71E-01 | 4.77E-01 |
| BN_MVOcC_L_5_4 | 9089 | -1.23E-02 | 1.33E-01 | 4.18E-01 |
| BN_IFG_L_6_1 | 9089 | -1.25E-02 | 1.81E-01 | 4.77E-01 |
| BN_IPL_L_6_2 | 9089 | -1.25E-02 | 1.82E-01 | 4.77E-01 |
| BN_MTG_R_4_2 | 9089 | -1.27E-02 | 1.20E-01 | 3.86E-01 |
| BN_ITG_R_7_3 | 9089 | -1.27E-02 | 1.40E-01 | 4.32E-01 |
| BN_OrG_L_6_6 | 9089 | -1.30E-02 | 1.15E-01 | 3.80E-01 |
| BN_PrG_L_6_3 | 9089 | -1.31E-02 | 1.72E-01 | 4.77E-01 |
| BN_IPL_R_6_5 | 9089 | -1.32E-02 | 1.09E-01 | 3.79E-01 |
| BN_MVOcC_L_5_3 | 9089 | -1.32E-02 | 1.34E-01 | 4.18E-01 |
| BN_MFG_R_7_3 | 9089 | -1.33E-02 | 1.02E-01 | 3.69E-01 |
| BN_PhG_R_6_2 | 9089 | -1.36E-02 | 8.52E-02 | 3.27E-01 |
| BN_IPL_L_6_4 | 9089 | -1.36E-02 | 1.16E-01 | 3.80E-01 |
| BN_IFG_L_6_5 | 9089 | -1.36E-02 | 1.17E-01 | 3.80E-01 |
| BN_IPL_R_6_2 | 9089 | -1.41E-02 | 1.08E-01 | 3.79E-01 |
| BN_PrG_R_6_1 | 9089 | -1.43E-02 | 1.13E-01 | 3.80E-01 |
| BN_IPL_L_6_6 | 9089 | -1.44E-02 | 8.64E-02 | 3.27E-01 |
| BN_MFG_R_7_4 | 9089 | -1.45E-02 | 8.65E-02 | 3.27E-01 |
| BN_INS_R_6_1 | 9089 | -1.46E-02 | 6.77E-02 | 2.88E-01 |
| BN_FuG_R_3_3 | 9089 | -1.47E-02 | 6.34E-02 | 2.78E-01 |
| BN_CG_L_7_1 | 9089 | -1.48E-02 | 5.51E-02 | 2.50E-01 |
| BN_IFG_L_6_6 | 9089 | -1.48E-02 | 1.04E-01 | 3.74E-01 |
| BN_CG_L_7_7 | 9089 | -1.49E-02 | 6.94E-02 | 2.88E-01 |
| BN_IFG_L_6_3 | 9089 | -1.51E-02 | 1.08E-01 | 3.79E-01 |
| BN_INS_L_6_4 | 9089 | -1.52E-02 | 7.62E-02 | 3.06E-01 |
| BN_PrG_L_6_2 | 9089 | -1.55E-02 | 9.00E-02 | 3.31E-01 |
| BN_pSTS_R_2_1 | 9089 | -1.62E-02 | 8.91E-02 | 3.31E-01 |
| BN_OrG_R_6_1 | 9089 | -1.67E-02 | 3.10E-02 | 1.56E-01 |
| BN_CG_R_7_1 | 9089 | -1.73E-02 | 2.90E-02 | 1.50E-01 |
| BN_INS_R_6_2 | 9089 | -1.77E-02 | 4.14E-02 | 2.00E-01 |
| BN_INS_R_6_3 | 9089 | -1.80E-02 | 3.77E-02 | 1.87E-01 |
| BN_INS_L_6_1 | 9089 | -1.85E-02 | 2.26E-02 | 1.22E-01 |
| BN_Tha_R | 9089 | -1.91E-02 | 5.10E-02 | 2.36E-01 |
| BN_pSTS_R_2_2 | 9089 | -1.94E-02 | 3.92E-02 | 1.92E-01 |
| BN_OrG_L_6_1 | 9089 | -1.99E-02 | 1.82E-02 | 1.05E-01 |
| BN_PhG_L_6_3 | 9089 | -2.02E-02 | 2.09E-02 | 1.17E-01 |
| BN_SFG_L_7_6 | 9089 | -2.05E-02 | 1.69E-02 | 1.01E-01 |
| BN_OrG_R_6_5 | 9089 | -2.05E-02 | 4.98E-03 | 3.78E-02 |
| BN_SFG_R_7_6 | 9089 | -2.09E-02 | 1.16E-02 | 7.63E-02 |
| BN_PhG_R_6_3 | 9089 | -2.12E-02 | 2.41E-02 | 1.29E-01 |
| BN_INS_L_6_3 | 9089 | -2.15E-02 | 1.38E-02 | 8.49E-02 |
| BN_SFG_R_7_7 | 9089 | -2.23E-02 | 4.26E-03 | 3.44E-02 |
| BN_OrG_L_6_5 | 9089 | -2.23E-02 | 1.38E-03 | 1.29E-02 |
| BN_MFG_R_7_1 | 9089 | -2.30E-02 | 5.64E-03 | 4.10E-02 |
| BN_Tha_L | 9089 | -2.36E-02 | 1.72E-02 | 1.01E-01 |
| BN_INS_R_6_6 | 9089 | -2.39E-02 | 4.95E-03 | 3.78E-02 |
| BN_PrG_L_6_4 | 9089 | -2.46E-05 | 9.98E-01 | 9.98E-01 |
| BN_MFG_L_7_7 | 9089 | -4.14E-05 | 9.96E-01 | 9.98E-01 |
| BN_MFG_L_7_6 | 9089 | -5.02E-05 | 9.95E-01 | 9.98E-01 |
| BN_MVOcC_R_5_2 | 9089 | 1.96E-04 | 9.83E-01 | 9.98E-01 |
| BN_PhG_R_6_5 | 9089 | 1.99E-04 | 9.81E-01 | 9.98E-01 |
| BN_CG_L_7_4 | 9089 | 3.30E-04 | 9.67E-01 | 9.97E-01 |
| BN_FuG_L_3_2 | 9089 | 6.18E-04 | 9.38E-01 | 9.87E-01 |
| cere_Left | 9089 | 6.36E-04 | 9.39E-01 | 9.87E-01 |
| BN_PCun_L_4_1 | 9089 | 6.68E-04 | 9.41E-01 | 9.87E-01 |
| BN_Amyg_R | 9089 | 7.43E-04 | 9.23E-01 | 9.79E-01 |
| BN_INS_L_6_5 | 9089 | 9.33E-04 | 9.11E-01 | 9.79E-01 |
| BN_PhG_L_6_6 | 9089 | 1.00E-03 | 9.16E-01 | 9.79E-01 |
| BN_SPL_L_5_3 | 9089 | 1.00E-03 | 9.17E-01 | 9.79E-01 |
| BN_SFG_R_7_4 | 9089 | 1.03E-03 | 9.08E-01 | 9.79E-01 |
| BN_ITG_L_7_5 | 9089 | 1.07E-03 | 9.07E-01 | 9.79E-01 |
| BN_PhG_R_6_4 | 9089 | 1.12E-03 | 8.82E-01 | 9.79E-01 |
| BN_PCL_L_2_2 | 9089 | 1.17E-03 | 9.01E-01 | 9.79E-01 |
| BN_CG_R_7_7 | 9089 | 1.44E-03 | 8.74E-01 | 9.79E-01 |
| BN_PhG_R_6_1 | 9089 | 1.51E-03 | 8.66E-01 | 9.79E-01 |
| BN_OrG_L_6_3 | 9089 | 1.53E-03 | 8.47E-01 | 9.78E-01 |
| BN_SFG_L_7_4 | 9089 | 2.28E-03 | 7.91E-01 | 9.58E-01 |
| BN_SFG_L_7_2 | 9089 | 2.39E-03 | 7.78E-01 | 9.58E-01 |
| BN_LOcC_R_2_1 | 9089 | 2.82E-03 | 7.57E-01 | 9.51E-01 |
| BN_pSTS_L_2_2 | 9089 | 2.85E-03 | 7.71E-01 | 9.58E-01 |
| BN_CG_R_7_3 | 9089 | 2.90E-03 | 7.54E-01 | 9.50E-01 |
| BN_PCun_R_4_3 | 9089 | 2.91E-03 | 7.33E-01 | 9.40E-01 |
| BN_LOcC_L_4_2 | 9089 | 3.75E-03 | 6.78E-01 | 8.96E-01 |
| cere_Right | 9089 | 3.82E-03 | 6.46E-01 | 8.72E-01 |
| BN_MFG_L_7_3 | 9089 | 4.15E-03 | 6.23E-01 | 8.50E-01 |
| BN_LOcC_R_2_2 | 9089 | 4.17E-03 | 6.66E-01 | 8.87E-01 |
| BN_BG_R_6_3 | 9089 | 4.41E-03 | 5.72E-01 | 8.00E-01 |
| BN_BG_L_6_3 | 9089 | 4.57E-03 | 5.54E-01 | 7.82E-01 |
| BN_LOcC_R_4_1 | 9089 | 5.14E-03 | 5.49E-01 | 7.80E-01 |
| BN_MTG_R_4_1 | 9089 | 5.26E-03 | 5.14E-01 | 7.56E-01 |
| BN_CG_R_7_2 | 9089 | 5.28E-03 | 5.73E-01 | 8.00E-01 |
| BN_PCun_L_4_2 | 9089 | 5.57E-03 | 5.38E-01 | 7.68E-01 |
| BN_PCun_R_4_2 | 9089 | 5.60E-03 | 5.27E-01 | 7.66E-01 |
| BN_MFG_R_7_2 | 9089 | 5.63E-03 | 5.24E-01 | 7.64E-01 |
| BN_MFG_R_7_6 | 9089 | 5.85E-03 | 4.94E-01 | 7.35E-01 |
| BN_PrG_L_6_5 | 9089 | 6.15E-03 | 4.69E-01 | 7.25E-01 |
| BN_ITG_L_7_4 | 9089 | 6.22E-03 | 4.89E-01 | 7.35E-01 |
| BN_LOcC_R_4_3 | 9089 | 6.39E-03 | 4.50E-01 | 7.09E-01 |
| BN_PoG_L_4_3 | 9089 | 6.93E-03 | 4.51E-01 | 7.09E-01 |
| BN_PhG_L_6_4 | 9089 | 6.94E-03 | 3.78E-01 | 6.85E-01 |
| BN_Amyg_L | 9089 | 7.03E-03 | 3.84E-01 | 6.85E-01 |
| BN_PhG_L_6_5 | 9089 | 7.19E-03 | 4.13E-01 | 6.94E-01 |
| BN_MTG_R_4_3 | 9089 | 7.31E-03 | 3.90E-01 | 6.88E-01 |
| BN_SPL_R_5_1 | 9089 | 7.42E-03 | 4.31E-01 | 7.09E-01 |
| BN_IPL_L_6_3 | 9089 | 8.46E-03 | 3.54E-01 | 6.68E-01 |
| BN_SPL_L_5_4 | 9089 | 8.73E-03 | 3.55E-01 | 6.68E-01 |
| BN_ITG_L_7_3 | 9089 | 8.80E-03 | 2.85E-01 | 6.09E-01 |
| BN_PCL_L_2_1 | 9089 | 9.16E-03 | 3.25E-01 | 6.52E-01 |
| BN_PCL_R_2_2 | 9089 | 1.07E-02 | 2.32E-01 | 5.54E-01 |
| BN_ITG_L_7_7 | 9089 | 1.10E-02 | 1.71E-01 | 4.77E-01 |
| BN_PCL_R_2_1 | 9089 | 1.14E-02 | 2.04E-01 | 5.21E-01 |
| BN_SPL_R_5_5 | 9089 | 1.23E-02 | 2.14E-01 | 5.33E-01 |
| BN_BG_L_6_2 | 9089 | 1.33E-02 | 1.79E-01 | 4.77E-01 |
| BN_PCun_R_4_1 | 9089 | 1.36E-02 | 1.32E-01 | 4.18E-01 |
| BN_BG_L_6_5 | 9089 | 1.41E-02 | 1.61E-01 | 4.77E-01 |
| BN_BG_R_6_4 | 9089 | 1.48E-02 | 1.14E-01 | 3.80E-01 |
| BN_ITG_R_7_6 | 9089 | 1.51E-02 | 7.67E-02 | 3.06E-01 |
| BN_BG_L_6_4 | 9089 | 1.66E-02 | 7.03E-02 | 2.88E-01 |
| BN_BG_R_6_2 | 9089 | 1.70E-02 | 9.03E-02 | 3.31E-01 |
| BN_ITG_L_7_1 | 9089 | 1.70E-02 | 7.07E-02 | 2.88E-01 |
| BN_SPL_R_5_2 | 9089 | 2.01E-02 | 2.99E-02 | 1.53E-01 |
| cere_Vermi | 9089 | 2.18E-02 | 1.73E-02 | 1.01E-01 |
| BN_BG_L_6_1 | 9089 | 2.28E-02 | 9.92E-03 | 6.92E-02 |
| BN_BG_R_6_1 | 9089 | 2.41E-02 | 5.10E-03 | 3.78E-02 |
| BN_BG_L_6_6 | 9089 | 2.92E-02 | 2.77E-03 | 2.39E-02 |
| BN_BG_R_6_5 | 9089 | 3.17E-02 | 1.21E-03 | 1.15E-02 |
| BN_BG_R_6_6 | 9089 | 4.10E-02 | 3.94E-05 | 5.11E-04 |
| BN_IPL_R_6_1 | 9089 | 9.90E-05 | 9.90E-01 | 9.98E-01 |

General linear regression analyses were conducted to examine the relationship between the transdiagnostic internalizing factor and regional GM volumes. The model controlled for the following covariates: sex, age, TDI, qualifications, smoking status, drinking frequency, head size, site information, and scanner bay location. Multiple comparisons were corrected using the FDR method.

**Supplementary Table 11. Association between the transdiagnostic internalizing factor (at imaging visit) and brain gray matter volume in ROI-based analyses.**

| **Feature** | **Number** | **β** | **P-value** | **FDR P-value** |
| --- | --- | --- | --- | --- |
| BN_PhG_L_6_4 | 7967 | -1.11E-04 | 9.89E-01 | 9.97E-01 |
| BN_SFG_R_7_4 | 7967 | -3.06E-04 | 9.74E-01 | 9.97E-01 |
| BN_LOcC_R_4_3 | 7967 | -4.56E-04 | 9.60E-01 | 9.94E-01 |
| BN_IFG_R_6_1 | 7967 | -6.54E-04 | 9.47E-01 | 9.94E-01 |
| BN_IPL_L_6_3 | 7967 | -7.02E-04 | 9.43E-01 | 9.94E-01 |
| BN_SFG_R_7_3 | 7967 | -7.08E-04 | 9.35E-01 | 9.94E-01 |
| BN_MFG_R_7_6 | 7967 | -1.21E-03 | 8.94E-01 | 9.78E-01 |
| BN_BG_L_6_3 | 7967 | -1.57E-03 | 8.49E-01 | 9.56E-01 |
| BN_CG_L_7_5 | 7967 | -1.59E-03 | 8.64E-01 | 9.68E-01 |
| BN_BG_R_6_3 | 7967 | -1.73E-03 | 8.35E-01 | 9.46E-01 |
| BN_LOcC_L_2_1 | 7967 | -2.05E-03 | 8.37E-01 | 9.46E-01 |
| BN_PCun_L_4_4 | 7967 | -2.18E-03 | 7.98E-01 | 9.34E-01 |
| BN_pSTS_L_2_2 | 7967 | -2.32E-03 | 8.23E-01 | 9.40E-01 |
| BN_IFG_R_6_6 | 7967 | -2.34E-03 | 8.16E-01 | 9.39E-01 |
| BN_MVOcC_R_5_4 | 7967 | -2.39E-03 | 7.83E-01 | 9.33E-01 |
| BN_FuG_L_3_2 | 7967 | -2.46E-03 | 7.70E-01 | 9.33E-01 |
| BN_PrG_L_6_6 | 7967 | -2.63E-03 | 7.78E-01 | 9.33E-01 |
| BN_MFG_L_7_2 | 7967 | -2.97E-03 | 7.43E-01 | 9.13E-01 |
| BN_ITG_L_7_4 | 7967 | -2.99E-03 | 7.55E-01 | 9.21E-01 |
| BN_PhG_L_6_5 | 7967 | -3.05E-03 | 7.45E-01 | 9.13E-01 |
| BN_PCun_R_4_4 | 7967 | -3.26E-03 | 7.07E-01 | 8.86E-01 |
| BN_IPL_R_6_3 | 7967 | -3.37E-03 | 7.29E-01 | 9.08E-01 |
| BN_ITG_L_7_3 | 7967 | -3.41E-03 | 6.98E-01 | 8.84E-01 |
| BN_CG_L_7_4 | 7967 | -3.49E-03 | 6.84E-01 | 8.77E-01 |
| BN_IFG_R_6_4 | 7967 | -3.51E-03 | 7.03E-01 | 8.86E-01 |
| BN_MFG_L_7_7 | 7967 | -3.75E-03 | 6.55E-01 | 8.64E-01 |
| BN_MVOcC_R_5_2 | 7967 | -3.87E-03 | 6.85E-01 | 8.77E-01 |
| BN_LOcC_L_2_2 | 7967 | -3.96E-03 | 6.97E-01 | 8.84E-01 |
| BN_MFG_L_7_3 | 7967 | -4.06E-03 | 6.51E-01 | 8.64E-01 |
| BN_MVOcC_R_5_5 | 7967 | -4.17E-03 | 6.61E-01 | 8.64E-01 |
| BN_SPL_L_5_1 | 7967 | -4.36E-03 | 6.61E-01 | 8.64E-01 |
| BN_ITG_R_7_4 | 7967 | -4.46E-03 | 6.35E-01 | 8.64E-01 |
| BN_PhG_L_6_6 | 7967 | -4.46E-03 | 6.60E-01 | 8.64E-01 |
| BN_BG_L_6_2 | 7967 | -4.54E-03 | 6.67E-01 | 8.64E-01 |
| BN_SFG_L_7_5 | 7967 | -4.59E-03 | 6.01E-01 | 8.60E-01 |
| BN_CG_R_7_5 | 7967 | -4.77E-03 | 6.23E-01 | 8.64E-01 |
| BN_BG_R_6_2 | 7967 | -4.99E-03 | 6.40E-01 | 8.64E-01 |
| BN_PoG_L_4_3 | 7967 | -5.00E-03 | 6.10E-01 | 8.62E-01 |
| BN_PrG_R_6_6 | 7967 | -5.04E-03 | 5.94E-01 | 8.60E-01 |
| BN_STG_R_6_2 | 7967 | -5.12E-03 | 5.82E-01 | 8.60E-01 |
| BN_SPL_L_5_2 | 7967 | -5.14E-03 | 6.02E-01 | 8.60E-01 |
| BN_SFG_R_7_2 | 7967 | -5.64E-03 | 5.43E-01 | 8.43E-01 |
| BN_ITG_L_7_5 | 7967 | -5.74E-03 | 5.53E-01 | 8.43E-01 |
| BN_PoG_R_4_3 | 7967 | -5.85E-03 | 5.53E-01 | 8.43E-01 |
| BN_MVOcC_R_5_3 | 7967 | -6.23E-03 | 5.19E-01 | 8.17E-01 |
| BN_ITG_R_7_1 | 7967 | -6.25E-03 | 5.17E-01 | 8.17E-01 |
| BN_STG_L_6_2 | 7967 | -6.43E-03 | 4.97E-01 | 7.99E-01 |
| BN_SFG_L_7_4 | 7967 | -6.64E-03 | 4.70E-01 | 7.71E-01 |
| BN_MTG_L_4_4 | 7967 | -7.02E-03 | 4.31E-01 | 7.33E-01 |
| BN_PoG_R_4_4 | 7967 | -7.18E-03 | 4.70E-01 | 7.71E-01 |
| BN_CG_L_7_3 | 7967 | -7.22E-03 | 4.20E-01 | 7.25E-01 |
| BN_PhG_R_6_5 | 7967 | -7.43E-03 | 3.97E-01 | 7.06E-01 |
| BN_Amyg_L | 7967 | -7.54E-03 | 3.82E-01 | 6.90E-01 |
| BN_IPL_R_6_4 | 7967 | -7.60E-03 | 4.26E-01 | 7.29E-01 |
| BN_INS_L_6_2 | 7967 | -7.71E-03 | 4.06E-01 | 7.06E-01 |
| BN_IPL_L_6_1 | 7967 | -7.79E-03 | 4.05E-01 | 7.06E-01 |
| BN_MTG_R_4_4 | 7967 | -7.93E-03 | 3.49E-01 | 6.73E-01 |
| BN_MFG_R_7_7 | 7967 | -7.94E-03 | 3.37E-01 | 6.73E-01 |
| BN_LOcC_L_4_3 | 7967 | -7.99E-03 | 3.81E-01 | 6.90E-01 |
| BN_MVOcC_L_5_5 | 7967 | -8.15E-03 | 4.03E-01 | 7.06E-01 |
| BN_OrG_L_6_2 | 7967 | -8.26E-03 | 3.29E-01 | 6.73E-01 |
| BN_STG_L_6_6 | 7967 | -8.29E-03 | 3.50E-01 | 6.73E-01 |
| BN_MFG_L_7_1 | 7967 | -8.36E-03 | 3.46E-01 | 6.73E-01 |
| BN_IFG_L_6_4 | 7967 | -8.40E-03 | 3.65E-01 | 6.82E-01 |
| BN_PoG_L_4_2 | 7967 | -8.51E-03 | 3.43E-01 | 6.73E-01 |
| BN_SFG_R_7_5 | 7967 | -8.60E-03 | 3.45E-01 | 6.73E-01 |
| BN_IFG_L_6_2 | 7967 | -8.60E-03 | 3.66E-01 | 6.82E-01 |
| BN_INS_R_6_2 | 7967 | -8.75E-03 | 3.45E-01 | 6.73E-01 |
| BN_IPL_R_6_6 | 7967 | -8.77E-03 | 3.27E-01 | 6.73E-01 |
| BN_IPL_R_6_1 | 7967 | -8.81E-03 | 3.18E-01 | 6.73E-01 |
| BN_PrG_R_6_2 | 7967 | -8.83E-03 | 3.62E-01 | 6.82E-01 |
| Hypothalamus_right | 7967 | -8.89E-03 | 3.62E-01 | 6.82E-01 |
| BN_ITG_R_7_3 | 7967 | -8.91E-03 | 3.33E-01 | 6.73E-01 |
| BN_FuG_L_3_3 | 7967 | -8.92E-03 | 2.91E-01 | 6.34E-01 |
| BN_PhG_L_6_2 | 7967 | -8.96E-03 | 3.12E-01 | 6.67E-01 |
| BN_PrG_L_6_4 | 7967 | -9.13E-03 | 3.75E-01 | 6.87E-01 |
| BN_PhG_R_6_1 | 7967 | -9.66E-03 | 3.11E-01 | 6.67E-01 |
| BN_OrG_R_6_6 | 7967 | -9.73E-03 | 2.64E-01 | 5.91E-01 |
| BN_PhG_R_6_4 | 7967 | -9.74E-03 | 2.25E-01 | 5.41E-01 |
| BN_LOcC_L_4_4 | 7967 | -9.77E-03 | 2.57E-01 | 5.91E-01 |
| BN_LOcC_R_4_4 | 7967 | -9.95E-03 | 2.35E-01 | 5.52E-01 |
| BN_MVOcC_L_5_2 | 7967 | -1.01E-02 | 2.89E-01 | 6.34E-01 |
| BN_SPL_L_5_5 | 7967 | -1.01E-02 | 3.33E-01 | 6.73E-01 |
| BN_STG_L_6_3 | 7967 | -1.03E-02 | 2.28E-01 | 5.42E-01 |
| BN_STG_R_6_5 | 7967 | -1.03E-02 | 2.63E-01 | 5.91E-01 |
| BN_PrG_L_6_1 | 7967 | -1.04E-02 | 2.70E-01 | 6.00E-01 |
| BN_Amyg_R | 7967 | -1.05E-02 | 2.04E-01 | 5.35E-01 |
| BN_FuG_R_3_2 | 7967 | -1.05E-02 | 1.95E-01 | 5.35E-01 |
| BN_SFG_L_7_1 | 7967 | -1.07E-02 | 2.41E-01 | 5.62E-01 |
| BN_INS_R_6_5 | 7967 | -1.08E-02 | 2.13E-01 | 5.35E-01 |
| BN_MVOcC_R_5_1 | 7967 | -1.10E-02 | 2.23E-01 | 5.41E-01 |
| BN_CG_L_7_7 | 7967 | -1.11E-02 | 2.04E-01 | 5.35E-01 |
| BN_CG_R_7_4 | 7967 | -1.11E-02 | 1.92E-01 | 5.35E-01 |
| BN_STG_R_6_1 | 7967 | -1.12E-02 | 2.19E-01 | 5.37E-01 |
| BN_STG_L_6_5 | 7967 | -1.12E-02 | 2.16E-01 | 5.35E-01 |
| BN_PhG_L_6_1 | 7967 | -1.13E-02 | 2.11E-01 | 5.35E-01 |
| BN_IFG_R_6_3 | 7967 | -1.14E-02 | 2.59E-01 | 5.91E-01 |
| BN_MFG_R_7_3 | 7967 | -1.15E-02 | 1.84E-01 | 5.30E-01 |
| BN_CG_L_7_1 | 7967 | -1.19E-02 | 1.49E-01 | 4.57E-01 |
| BN_MVOcC_L_5_4 | 7967 | -1.21E-02 | 1.65E-01 | 4.80E-01 |
| BN_LOcC_R_4_2 | 7967 | -1.21E-02 | 2.01E-01 | 5.35E-01 |
| BN_IFG_L_6_6 | 7967 | -1.21E-02 | 2.11E-01 | 5.35E-01 |
| BN_STG_L_6_1 | 7967 | -1.22E-02 | 1.93E-01 | 5.35E-01 |
| BN_IPL_R_6_5 | 7967 | -1.25E-02 | 1.54E-01 | 4.65E-01 |
| BN_PrG_R_6_4 | 7967 | -1.26E-02 | 2.09E-01 | 5.35E-01 |
| BN_OrG_R_6_4 | 7967 | -1.29E-02 | 1.08E-01 | 4.05E-01 |
| BN_STG_R_6_3 | 7967 | -1.29E-02 | 1.34E-01 | 4.23E-01 |
| BN_OrG_R_6_2 | 7967 | -1.30E-02 | 1.20E-01 | 4.09E-01 |
| Hypothalamus_left | 7967 | -1.32E-02 | 1.64E-01 | 4.80E-01 |
| BN_INS_L_6_6 | 7967 | -1.39E-02 | 1.31E-01 | 4.23E-01 |
| BN_PoG_R_4_2 | 7967 | -1.40E-02 | 1.24E-01 | 4.13E-01 |
| BN_MFG_R_7_4 | 7967 | -1.43E-02 | 1.13E-01 | 4.06E-01 |
| BN_MTG_R_4_2 | 7967 | -1.43E-02 | 1.00E-01 | 4.05E-01 |
| BN_INS_R_6_4 | 7967 | -1.44E-02 | 1.12E-01 | 4.06E-01 |
| BN_IFG_R_6_2 | 7967 | -1.45E-02 | 1.30E-01 | 4.23E-01 |
| BN_PoG_L_4_1 | 7967 | -1.45E-02 | 1.18E-01 | 4.09E-01 |
| BN_MFG_L_7_4 | 7967 | -1.45E-02 | 1.07E-01 | 4.05E-01 |
| BN_ITG_R_7_2 | 7967 | -1.47E-02 | 1.02E-01 | 4.05E-01 |
| BN_OrG_L_6_6 | 7967 | -1.48E-02 | 9.08E-02 | 3.96E-01 |
| BN_ITG_R_7_5 | 7967 | -1.51E-02 | 1.07E-01 | 4.05E-01 |
| BN_MTG_L_4_2 | 7967 | -1.52E-02 | 7.50E-02 | 3.64E-01 |
| BN_pSTS_R_2_1 | 7967 | -1.53E-02 | 1.34E-01 | 4.23E-01 |
| BN_ITG_L_7_6 | 7967 | -1.54E-02 | 1.08E-01 | 4.05E-01 |
| BN_IPL_L_6_2 | 7967 | -1.55E-02 | 1.21E-01 | 4.09E-01 |
| BN_CG_R_7_1 | 7967 | -1.55E-02 | 6.62E-02 | 3.59E-01 |
| BN_INS_L_6_5 | 7967 | -1.56E-02 | 7.85E-02 | 3.73E-01 |
| BN_INS_R_6_1 | 7967 | -1.56E-02 | 6.77E-02 | 3.59E-01 |
| BN_MVOcC_L_5_3 | 7967 | -1.57E-02 | 9.67E-02 | 4.02E-01 |
| BN_PhG_R_6_6 | 7967 | -1.57E-02 | 1.13E-01 | 4.06E-01 |
| BN_IPL_R_6_2 | 7967 | -1.58E-02 | 9.17E-02 | 3.96E-01 |
| BN_INS_L_6_1 | 7967 | -1.59E-02 | 6.68E-02 | 3.59E-01 |
| BN_FuG_R_3_1 | 7967 | -1.63E-02 | 4.15E-02 | 2.90E-01 |
| BN_PrG_L_6_2 | 7967 | -1.65E-02 | 9.18E-02 | 3.96E-01 |
| BN_PoG_L_4_4 | 7967 | -1.67E-02 | 8.94E-02 | 3.96E-01 |
| BN_MTG_L_4_3 | 7967 | -1.72E-02 | 6.70E-02 | 3.59E-01 |
| BN_pSTS_R_2_2 | 7967 | -1.74E-02 | 8.34E-02 | 3.88E-01 |
| BN_INS_L_6_4 | 7967 | -1.74E-02 | 5.67E-02 | 3.48E-01 |
| BN_IFG_L_6_1 | 7967 | -1.77E-02 | 7.42E-02 | 3.64E-01 |
| BN_PrG_R_6_1 | 7967 | -1.79E-02 | 6.25E-02 | 3.59E-01 |
| BN_OrG_L_6_4 | 7967 | -1.79E-02 | 3.24E-02 | 2.78E-01 |
| BN_SFG_L_7_6 | 7967 | -1.79E-02 | 4.98E-02 | 3.22E-01 |
| BN_IFG_L_6_3 | 7967 | -1.79E-02 | 7.43E-02 | 3.64E-01 |
| BN_ITG_R_7_7 | 7967 | -1.79E-02 | 3.61E-02 | 2.78E-01 |
| BN_FuG_L_3_1 | 7967 | -1.82E-02 | 2.81E-02 | 2.64E-01 |
| BN_IFG_R_6_5 | 7967 | -1.84E-02 | 4.22E-02 | 2.90E-01 |
| BN_SFG_R_7_6 | 7967 | -1.86E-02 | 3.54E-02 | 2.78E-01 |
| BN_Hipp_L | 7967 | -1.86E-02 | 2.60E-02 | 2.64E-01 |
| BN_IPL_L_6_6 | 7967 | -1.87E-02 | 3.70E-02 | 2.78E-01 |
| BN_MTG_L_4_1 | 7967 | -1.88E-02 | 2.88E-02 | 2.64E-01 |
| BN_OrG_L_6_1 | 7967 | -1.98E-02 | 2.73E-02 | 2.64E-01 |
| BN_PrG_R_6_3 | 7967 | -1.98E-02 | 4.36E-02 | 2.90E-01 |
| BN_INS_R_6_3 | 7967 | -2.05E-02 | 2.71E-02 | 2.64E-01 |
| BN_PoG_R_4_1 | 7967 | -2.06E-02 | 2.95E-02 | 2.64E-01 |
| BN_PhG_R_6_3 | 7967 | -2.06E-02 | 3.96E-02 | 2.89E-01 |
| BN_FuG_R_3_3 | 7967 | -2.08E-02 | 1.32E-02 | 2.06E-01 |
| BN_IFG_L_6_5 | 7967 | -2.08E-02 | 2.46E-02 | 2.64E-01 |
| BN_OrG_R_6_1 | 7967 | -2.09E-02 | 1.15E-02 | 2.06E-01 |
| BN_Hipp_R | 7967 | -2.16E-02 | 1.10E-02 | 2.06E-01 |
| BN_IPL_L_6_4 | 7967 | -2.20E-02 | 1.70E-02 | 2.20E-01 |
| BN_MFG_R_7_1 | 7967 | -2.20E-02 | 1.27E-02 | 2.06E-01 |
| BN_OrG_L_6_5 | 7967 | -2.23E-02 | 2.76E-03 | 1.07E-01 |
| BN_OrG_R_6_5 | 7967 | -2.26E-02 | 3.73E-03 | 1.24E-01 |
| BN_ITG_L_7_2 | 7967 | -2.31E-02 | 1.42E-02 | 2.07E-01 |
| BN_IPL_L_6_5 | 7967 | -2.40E-02 | 8.32E-03 | 1.98E-01 |
| BN_INS_L_6_3 | 7967 | -2.43E-02 | 9.23E-03 | 1.98E-01 |
| BN_PhG_L_6_3 | 7967 | -2.51E-02 | 7.11E-03 | 1.98E-01 |
| BN_PhG_R_6_2 | 7967 | -2.61E-02 | 1.88E-03 | 1.07E-01 |
| BN_PrG_L_6_3 | 7967 | -2.67E-02 | 9.36E-03 | 1.98E-01 |
| BN_INS_R_6_6 | 7967 | -2.71E-02 | 2.73E-03 | 1.07E-01 |
| BN_SFG_R_7_7 | 7967 | -2.80E-02 | 7.62E-04 | 8.88E-02 |
| BN_Tha_R | 7967 | -3.20E-02 | 2.21E-03 | 1.07E-01 |
| BN_Tha_L | 7967 | -3.67E-02 | 5.35E-04 | 8.88E-02 |
| BN_BG_L_6_6 | 7967 | -3.36E-05 | 9.97E-01 | 9.97E-01 |
| BN_SPL_R_5_3 | 7967 | 2.33E-04 | 9.82E-01 | 9.97E-01 |
| BN_LOcC_L_4_1 | 7967 | 2.78E-04 | 9.77E-01 | 9.97E-01 |
| BN_MTG_R_4_3 | 7967 | 3.32E-04 | 9.71E-01 | 9.97E-01 |
| BN_PCun_L_4_3 | 7967 | 4.93E-04 | 9.58E-01 | 9.94E-01 |
| BN_CG_R_7_3 | 7967 | 5.70E-04 | 9.54E-01 | 9.94E-01 |
| BN_STG_R_6_6 | 7967 | 6.57E-04 | 9.42E-01 | 9.94E-01 |
| BN_MFG_L_7_6 | 7967 | 7.80E-04 | 9.33E-01 | 9.94E-01 |
| BN_MTG_R_4_1 | 7967 | 9.72E-04 | 9.10E-01 | 9.81E-01 |
| BN_LOcC_R_4_1 | 7967 | 1.02E-03 | 9.11E-01 | 9.81E-01 |
| BN_SFG_L_7_3 | 7967 | 1.10E-03 | 8.99E-01 | 9.79E-01 |
| BN_BG_L_6_5 | 7967 | 1.16E-03 | 9.13E-01 | 9.81E-01 |
| BN_OrG_L_6_3 | 7967 | 1.19E-03 | 8.89E-01 | 9.77E-01 |
| BN_SPL_R_5_4 | 7967 | 1.44E-03 | 8.88E-01 | 9.77E-01 |
| BN_SPL_L_5_3 | 7967 | 1.45E-03 | 8.88E-01 | 9.77E-01 |
| BN_LOcC_L_4_2 | 7967 | 1.48E-03 | 8.78E-01 | 9.77E-01 |
| BN_SFG_L_7_7 | 7967 | 1.92E-03 | 8.18E-01 | 9.39E-01 |
| BN_MFG_L_7_5 | 7967 | 1.97E-03 | 8.18E-01 | 9.39E-01 |
| BN_OrG_R_6_3 | 7967 | 2.11E-03 | 7.95E-01 | 9.34E-01 |
| BN_CG_R_7_6 | 7967 | 2.12E-03 | 7.97E-01 | 9.34E-01 |
| BN_PCL_L_2_2 | 7967 | 2.47E-03 | 8.04E-01 | 9.37E-01 |
| BN_PCun_R_4_3 | 7967 | 2.54E-03 | 7.81E-01 | 9.33E-01 |
| BN_BG_R_6_4 | 7967 | 2.73E-03 | 7.84E-01 | 9.33E-01 |
| BN_STG_R_6_4 | 7967 | 3.06E-03 | 7.40E-01 | 9.13E-01 |
| BN_ITG_L_7_7 | 7967 | 4.30E-03 | 6.18E-01 | 8.62E-01 |
| cere_Left | 7967 | 4.30E-03 | 6.28E-01 | 8.64E-01 |
| BN_SPL_R_5_1 | 7967 | 4.43E-03 | 6.59E-01 | 8.64E-01 |
| BN_SPL_R_5_5 | 7967 | 4.53E-03 | 6.68E-01 | 8.64E-01 |
| BN_pSTS_L_2_1 | 7967 | 4.91E-03 | 6.38E-01 | 8.64E-01 |
| BN_BG_L_6_4 | 7967 | 4.96E-03 | 6.11E-01 | 8.62E-01 |
| BN_ITG_L_7_1 | 7967 | 5.06E-03 | 6.14E-01 | 8.62E-01 |
| BN_ITG_R_7_6 | 7967 | 5.08E-03 | 5.76E-01 | 8.60E-01 |
| BN_PCun_L_4_1 | 7967 | 5.23E-03 | 5.88E-01 | 8.60E-01 |
| BN_STG_L_6_4 | 7967 | 5.25E-03 | 5.73E-01 | 8.60E-01 |
| BN_PCun_R_4_2 | 7967 | 5.28E-03 | 5.77E-01 | 8.60E-01 |
| BN_SPL_L_5_4 | 7967 | 5.30E-03 | 5.98E-01 | 8.60E-01 |
| BN_SFG_R_7_1 | 7967 | 5.47E-03 | 5.29E-01 | 8.27E-01 |
| BN_CG_L_7_6 | 7967 | 5.55E-03 | 5.16E-01 | 8.17E-01 |
| BN_BG_R_6_6 | 7967 | 5.65E-03 | 5.95E-01 | 8.60E-01 |
| BN_CG_R_7_7 | 7967 | 5.79E-03 | 5.49E-01 | 8.43E-01 |
| cere_Right | 7967 | 6.17E-03 | 4.86E-01 | 7.92E-01 |
| BN_PCL_L_2_1 | 7967 | 6.85E-03 | 4.90E-01 | 7.93E-01 |
| BN_PCL_R_2_2 | 7967 | 6.94E-03 | 4.69E-01 | 7.71E-01 |
| BN_SFG_L_7_2 | 7967 | 7.00E-03 | 4.39E-01 | 7.41E-01 |
| BN_MVOcC_L_5_1 | 7967 | 7.13E-03 | 4.45E-01 | 7.46E-01 |
| BN_PrG_L_6_5 | 7967 | 7.53E-03 | 4.06E-01 | 7.06E-01 |
| BN_LOcC_R_2_2 | 7967 | 9.21E-03 | 3.71E-01 | 6.86E-01 |
| BN_PCun_R_4_1 | 7967 | 1.20E-02 | 2.14E-01 | 5.35E-01 |
| BN_CG_L_7_2 | 7967 | 1.30E-02 | 2.12E-01 | 5.35E-01 |
| BN_MFG_R_7_2 | 7967 | 1.32E-02 | 1.62E-01 | 4.80E-01 |
| BN_PCun_L_4_2 | 7967 | 1.49E-02 | 1.21E-01 | 4.09E-01 |
| BN_BG_R_6_5 | 7967 | 1.56E-02 | 1.36E-01 | 4.23E-01 |
| BN_LOcC_R_2_1 | 7967 | 1.63E-02 | 9.42E-02 | 3.99E-01 |
| BN_BG_R_6_1 | 7967 | 1.69E-02 | 6.54E-02 | 3.59E-01 |
| BN_SPL_R_5_2 | 7967 | 1.77E-02 | 7.33E-02 | 3.64E-01 |
| BN_CG_R_7_2 | 7967 | 1.94E-02 | 5.11E-02 | 3.22E-01 |
| BN_BG_L_6_1 | 7967 | 1.97E-02 | 3.67E-02 | 2.78E-01 |
| BN_PCL_R_2_1 | 7967 | 2.10E-02 | 2.83E-02 | 2.64E-01 |
| cere_Vermi | 7967 | 2.35E-02 | 1.60E-02 | 2.20E-01 |
| BN_MFG_R_7_5 | 7967 | 5.59E-05 | 9.95E-01 | 9.97E-01 |
| BN_PrG_R_6_5 | 7967 | 6.99E-05 | 9.94E-01 | 9.97E-01 |

General linear regression analyses were conducted to examine the relationship between the transdiagnostic internalizing factor (at imaging visit) and regional gray matter volumes. The model controlled for the following covariates: sex, age, TDI, qualifications, smoking status, drinking frequency, head size, site information, and scanner bay location. Multiple comparisons were corrected using the FDR method.

**Supplementary Table 12. Association between the** **multimorbidity measure and brain gray matter volume in ROI-based analyses.**

| **Feature** | **Number** | **β** | **P-value** | **FDR P-value** |
| --- | --- | --- | --- | --- |
| BN SFG R 7 2 | 9089 | -6.34E-04 | 9.60E-01 | 9.72E-01 |
| BN PCun R 4 2 | 9089 | -1.27E-03 | 9.19E-01 | 9.37E-01 |
| BN BG R 6 1 | 9089 | -1.44E-03 | 9.10E-01 | 9.31E-01 |
| BN SPL L 5 5 | 9089 | -1.71E-03 | 8.79E-01 | 9.01E-01 |
| BN BG L 6 4 | 9089 | -2.36E-03 | 8.44E-01 | 8.71E-01 |
| BN BG L 6 1 | 9089 | -2.39E-03 | 8.48E-01 | 8.72E-01 |
| BN PCun L 4 2 | 9089 | -3.45E-03 | 7.78E-01 | 8.14E-01 |
| BN SPL R 5 4 | 9089 | -3.48E-03 | 7.63E-01 | 8.05E-01 |
| BN PhG L 6 4 | 9089 | -4.08E-03 | 7.71E-01 | 8.09E-01 |
| BN IFG L 6 3 | 9089 | -5.30E-03 | 6.51E-01 | 6.91E-01 |
| BN CG R 7 2 | 9089 | -7.82E-03 | 5.07E-01 | 5.48E-01 |
| BN BG R 6 2 | 9089 | -8.98E-03 | 4.15E-01 | 4.57E-01 |
| BN BG R 6 4 | 9089 | -9.17E-03 | 4.37E-01 | 4.80E-01 |
| BN CG L 7 2 | 9089 | -9.47E-03 | 4.00E-01 | 4.43E-01 |
| BN PCun R 4 4 | 9089 | -9.53E-03 | 4.82E-01 | 5.26E-01 |
| BN IPL L 6 2 | 9089 | -1.01E-02 | 3.89E-01 | 4.32E-01 |
| BN PhG R 6 4 | 9089 | -1.02E-02 | 4.87E-01 | 5.28E-01 |
| BN PCL L 2 1 | 9089 | -1.14E-02 | 3.36E-01 | 3.78E-01 |
| BN PoG L 4 4 | 9089 | -1.15E-02 | 3.38E-01 | 3.79E-01 |
| BN IPL R 6 2 | 9089 | -1.16E-02 | 3.55E-01 | 3.97E-01 |
| BN BG R 6 6 | 9089 | -1.24E-02 | 2.61E-01 | 2.99E-01 |
| BN BG L 6 6 | 9089 | -1.35E-02 | 2.33E-01 | 2.70E-01 |
| BN MFG R 7 6 | 9089 | -1.39E-02 | 2.83E-01 | 3.22E-01 |
| BN IFG R 6 3 | 9089 | -1.40E-02 | 2.31E-01 | 2.68E-01 |
| BN MFG R 7 2 | 9089 | -1.43E-02 | 2.53E-01 | 2.92E-01 |
| BN SPL R 5 5 | 9089 | -1.55E-02 | 1.64E-01 | 1.93E-01 |
| BN PCL L 2 2 | 9089 | -1.57E-02 | 1.85E-01 | 2.17E-01 |
| BN PrG L 6 3 | 9089 | -1.69E-02 | 1.40E-01 | 1.68E-01 |
| BN LOcC L 2 1 | 9089 | -1.72E-02 | 1.47E-01 | 1.75E-01 |
| BN SPL L 5 3 | 9089 | -1.73E-02 | 1.30E-01 | 1.57E-01 |
| BN SFG L 7 1 | 9089 | -1.76E-02 | 1.72E-01 | 2.02E-01 |
| BN SFG L 7 4 | 9089 | -2.05E-02 | 1.10E-01 | 1.34E-01 |
| BN CG R 7 1 | 9089 | -2.09E-02 | 1.34E-01 | 1.60E-01 |
| Hypothalamus left | 9089 | -2.09E-02 | 9.17E-02 | 1.12E-01 |
| BN PCL R 2 2 | 9089 | -2.15E-02 | 8.02E-02 | 9.94E-02 |
| BN PhG L 6 6 | 9089 | -2.16E-02 | 6.19E-02 | 7.80E-02 |
| BN SFG L 7 2 | 9089 | -2.17E-02 | 9.57E-02 | 1.17E-01 |
| BN MFG L 7 6 | 9089 | -2.26E-02 | 7.64E-02 | 9.53E-02 |
| BN MFG R 7 4 | 9089 | -2.27E-02 | 8.15E-02 | 1.01E-01 |
| BN LOcC R 2 2 | 9089 | -2.28E-02 | 4.62E-02 | 6.03E-02 |
| BN LOcC L 2 2 | 9089 | -2.31E-02 | 4.62E-02 | 6.03E-02 |
| BN SFG R 7 3 | 9089 | -2.33E-02 | 8.50E-02 | 1.05E-01 |
| BN IFG R 6 1 | 9089 | -2.35E-02 | 4.80E-02 | 6.22E-02 |
| BN ITG L 7 1 | 9089 | -2.35E-02 | 4.45E-02 | 5.85E-02 |
| BN CG R 7 7 | 9089 | -2.36E-02 | 5.24E-02 | 6.72E-02 |
| BN IFG R 6 4 | 9089 | -2.36E-02 | 6.42E-02 | 8.06E-02 |
| BN PrG R 6 2 | 9089 | -2.47E-02 | 4.21E-02 | 5.60E-02 |
| BN SFG L 7 3 | 9089 | -2.58E-02 | 5.70E-02 | 7.28E-02 |
| BN IPL L 6 1 | 9089 | -2.63E-02 | 3.62E-02 | 4.86E-02 |
| BN PrG R 6 3 | 9089 | -2.67E-02 | 2.51E-02 | 3.46E-02 |
| BN PCun L 4 4 | 9089 | -2.69E-02 | 5.24E-02 | 6.72E-02 |
| BN IFG L 6 2 | 9089 | -2.70E-02 | 2.86E-02 | 3.90E-02 |
| BN SFG R 7 1 | 9089 | -2.75E-02 | 4.25E-02 | 5.63E-02 |
| BN IFG L 6 6 | 9089 | -2.80E-02 | 2.09E-02 | 2.92E-02 |
| BN IFG L 6 1 | 9089 | -2.85E-02 | 1.60E-02 | 2.28E-02 |
| BN SFG R 7 5 | 9089 | -2.88E-02 | 2.61E-02 | 3.57E-02 |
| BN STG R 6 4 | 9089 | -2.90E-02 | 2.23E-02 | 3.10E-02 |
| BN pSTS L 2 1 | 9089 | -2.98E-02 | 8.04E-03 | 1.23E-02 |
| BN MFG L 7 2 | 9089 | -3.05E-02 | 1.88E-02 | 2.65E-02 |
| BN INS L 6 4 | 9089 | -3.10E-02 | 1.63E-02 | 2.31E-02 |
| BN IFG R 6 2 | 9089 | -3.15E-02 | 1.06E-02 | 1.55E-02 |
| BN IPL R 6 4 | 9089 | -3.15E-02 | 1.05E-02 | 1.53E-02 |
| BN PCL R 2 1 | 9089 | -3.16E-02 | 1.02E-02 | 1.49E-02 |
| BN CG R 7 5 | 9089 | -3.17E-02 | 8.67E-03 | 1.29E-02 |
| BN MFG R 7 5 | 9089 | -3.24E-02 | 1.10E-02 | 1.60E-02 |
| BN STG L 6 4 | 9089 | -3.28E-02 | 9.40E-03 | 1.39E-02 |
| BN PhG L 6 5 | 9089 | -3.32E-02 | 8.32E-03 | 1.25E-02 |
| BN CG R 7 3 | 9089 | -3.40E-02 | 4.34E-03 | 6.77E-03 |
| BN ITG L 7 7 | 9089 | -3.42E-02 | 1.24E-02 | 1.79E-02 |
| BN STG L 6 6 | 9089 | -3.49E-02 | 8.61E-03 | 1.29E-02 |
| BN PhG L 6 2 | 9089 | -3.49E-02 | 8.30E-03 | 1.25E-02 |
| BN PrG R 6 6 | 9089 | -3.52E-02 | 4.75E-03 | 7.37E-03 |
| BN LOcC R 2 1 | 9089 | -3.59E-02 | 3.04E-03 | 4.84E-03 |
| BN PhG R 6 6 | 9089 | -3.60E-02 | 2.44E-03 | 3.93E-03 |
| BN ITG R 7 1 | 9089 | -3.61E-02 | 3.11E-03 | 4.93E-03 |
| BN CG R 7 4 | 9089 | -3.64E-02 | 8.29E-03 | 1.25E-02 |
| BN SFG L 7 6 | 9089 | -3.68E-02 | 4.23E-03 | 6.62E-03 |
| cere Vermi | 9089 | -3.77E-02 | 1.75E-03 | 2.92E-03 |
| BN SPL R 5 3 | 9089 | -3.82E-02 | 8.52E-04 | 1.54E-03 |
| BN pSTS L 2 2 | 9089 | -3.85E-02 | 6.42E-04 | 1.22E-03 |
| BN MVOcC R 5 3 | 9089 | -3.88E-02 | 1.47E-03 | 2.56E-03 |
| BN ITG R 7 5 | 9089 | -3.88E-02 | 1.96E-03 | 3.21E-03 |
| BN PhG R 6 5 | 9089 | -3.95E-02 | 3.24E-03 | 5.11E-03 |
| BN STG L 6 2 | 9089 | -3.96E-02 | 1.50E-03 | 2.57E-03 |
| BN ITG L 7 6 | 9089 | -3.98E-02 | 1.14E-03 | 2.01E-03 |
| BN ITG R 7 6 | 9089 | -3.99E-02 | 2.08E-03 | 3.40E-03 |
| BN IPL R 6 3 | 9089 | -4.00E-02 | 9.62E-04 | 1.73E-03 |
| BN PrG R 6 1 | 9089 | -4.01E-02 | 1.07E-03 | 1.89E-03 |
| BN CG L 7 6 | 9089 | -4.01E-02 | 3.52E-03 | 5.54E-03 |
| BN STG L 6 5 | 9089 | -4.04E-02 | 1.79E-03 | 2.97E-03 |
| BN LOcC R 4 3 | 9089 | -4.08E-02 | 1.77E-03 | 2.94E-03 |
| BN PoG R 4 3 | 9089 | -4.10E-02 | 5.84E-04 | 1.13E-03 |
| BN IFG R 6 6 | 9089 | -4.11E-02 | 4.26E-04 | 8.54E-04 |
| BN PrG L 6 6 | 9089 | -4.15E-02 | 1.01E-03 | 1.79E-03 |
| BN IPL R 6 1 | 9089 | -4.17E-02 | 1.72E-03 | 2.89E-03 |
| BN MFG L 7 3 | 9089 | -4.19E-02 | 1.34E-03 | 2.34E-03 |
| BN OrG L 6 3 | 9089 | -4.20E-02 | 2.45E-03 | 3.93E-03 |
| BN MFG L 7 7 | 9089 | -4.21E-02 | 2.55E-03 | 4.07E-03 |
| BN pSTS R 2 2 | 9089 | -4.26E-02 | 2.89E-04 | 5.92E-04 |
| BN PhG R 6 1 | 9089 | -4.26E-02 | 5.83E-04 | 1.13E-03 |
| BN INS L 6 3 | 9089 | -4.31E-02 | 6.54E-04 | 1.24E-03 |
| BN CG L 7 5 | 9089 | -4.32E-02 | 6.19E-04 | 1.18E-03 |
| BN ITG R 7 7 | 9089 | -4.32E-02 | 1.67E-03 | 2.83E-03 |
| BN STG R 6 5 | 9089 | -4.35E-02 | 6.67E-04 | 1.25E-03 |
| BN IFG L 6 4 | 9089 | -4.36E-02 | 6.06E-04 | 1.16E-03 |
| BN BG L 6 3 | 9089 | -4.36E-02 | 2.29E-03 | 3.72E-03 |
| BN INS R 6 4 | 9089 | -4.37E-02 | 7.81E-04 | 1.43E-03 |
| BN pSTS R 2 1 | 9089 | -4.39E-02 | 1.47E-04 | 3.20E-04 |
| Hypothalamus right | 9089 | -4.41E-02 | 2.44E-04 | 5.09E-04 |
| BN CG L 7 4 | 9089 | -4.49E-02 | 1.09E-03 | 1.93E-03 |
| BN MFG L 7 5 | 9089 | -4.50E-02 | 1.01E-03 | 1.79E-03 |
| BN CG L 7 1 | 9089 | -4.51E-02 | 1.68E-03 | 2.83E-03 |
| BN INS R 6 2 | 9089 | -4.51E-02 | 4.04E-04 | 8.16E-04 |
| BN OrG L 6 1 | 9089 | -4.57E-02 | 4.91E-04 | 9.57E-04 |
| BN OrG L 6 2 | 9089 | -4.65E-02 | 8.29E-04 | 1.51E-03 |
| BN MFG L 7 1 | 9089 | -4.65E-02 | 4.38E-04 | 8.70E-04 |
| BN STG L 6 1 | 9089 | -4.65E-02 | 2.13E-04 | 4.49E-04 |
| BN PrG R 6 5 | 9089 | -4.66E-02 | 2.92E-04 | 5.96E-04 |
| BN PCun L 4 3 | 9089 | -4.67E-02 | 1.92E-04 | 4.11E-04 |
| BN MFG R 7 1 | 9089 | -4.67E-02 | 4.28E-04 | 8.55E-04 |
| BN MFG L 7 4 | 9089 | -4.74E-02 | 2.87E-04 | 5.91E-04 |
| BN MFG R 7 3 | 9089 | -4.74E-02 | 4.57E-04 | 9.01E-04 |
| BN STG R 6 2 | 9089 | -4.75E-02 | 1.75E-04 | 3.77E-04 |
| BN SFG L 7 7 | 9089 | -4.75E-02 | 7.17E-04 | 1.33E-03 |
| BN MVOcC R 5 1 | 9089 | -4.78E-02 | 2.35E-04 | 4.92E-04 |
| BN LOcC L 4 1 | 9089 | -4.83E-02 | 7.94E-05 | 1.80E-04 |
| BN IPL L 6 4 | 9089 | -4.95E-02 | 1.01E-04 | 2.26E-04 |
| BN SFG L 7 5 | 9089 | -4.97E-02 | 2.01E-04 | 4.28E-04 |
| BN PhG R 6 3 | 9089 | -4.97E-02 | 2.33E-05 | 5.88E-05 |
| BN BG R 6 3 | 9089 | -5.01E-02 | 4.04E-04 | 8.16E-04 |
| BN IPL L 6 5 | 9089 | -5.04E-02 | 9.50E-05 | 2.13E-04 |
| BN MVOcC R 5 5 | 9089 | -5.05E-02 | 4.25E-05 | 1.04E-04 |
| BN PoG L 4 3 | 9089 | -5.06E-02 | 2.45E-05 | 6.13E-05 |
| BN PrG L 6 1 | 9089 | -5.07E-02 | 4.56E-05 | 1.09E-04 |
| BN PhG R 6 2 | 9089 | -5.10E-02 | 2.57E-04 | 5.32E-04 |
| BN ITG R 7 2 | 9089 | -5.13E-02 | 8.48E-05 | 1.91E-04 |
| BN PhG L 6 1 | 9089 | -5.17E-02 | 6.95E-05 | 1.60E-04 |
| BN CG L 7 7 | 9089 | -5.17E-02 | 1.19E-04 | 2.63E-04 |
| BN MVOcC R 5 4 | 9089 | -5.23E-02 | 1.08E-04 | 2.39E-04 |
| BN PCun R 4 3 | 9089 | -5.29E-02 | 4.27E-05 | 1.04E-04 |
| BN LOcC R 4 1 | 9089 | -5.29E-02 | 3.81E-05 | 9.48E-05 |
| BN MVOcC R 5 2 | 9089 | -5.32E-02 | 1.61E-05 | 4.16E-05 |
| BN LOcC R 4 2 | 9089 | -5.32E-02 | 1.80E-05 | 4.61E-05 |
| BN SFG R 7 6 | 9089 | -5.34E-02 | 6.15E-05 | 1.44E-04 |
| BN CG R 7 6 | 9089 | -5.34E-02 | 1.77E-04 | 3.80E-04 |
| BN INS L 6 2 | 9089 | -5.38E-02 | 2.30E-05 | 5.83E-05 |
| BN MVOcC L 5 5 | 9089 | -5.42E-02 | 7.02E-06 | 1.94E-05 |
| BN IPL R 6 5 | 9089 | -5.43E-02 | 5.08E-05 | 1.21E-04 |
| BN MVOcC L 5 1 | 9089 | -5.59E-02 | 8.59E-06 | 2.33E-05 |
| BN MFG R 7 7 | 9089 | -5.64E-02 | 7.78E-05 | 1.78E-04 |
| BN STG L 6 3 | 9089 | -5.65E-02 | 4.36E-05 | 1.05E-04 |
| BN IFG L 6 5 | 9089 | -5.70E-02 | 7.28E-06 | 2.00E-05 |
| BN MVOcC L 5 2 | 9089 | -5.78E-02 | 2.86E-06 | 8.59E-06 |
| BN PoG R 4 1 | 9089 | -5.80E-02 | 3.04E-06 | 8.98E-06 |
| BN Tha R | 9089 | -5.84E-02 | 2.00E-07 | 7.25E-07 |
| BN ITG L 7 4 | 9089 | -5.87E-02 | 1.74E-06 | 5.49E-06 |
| BN CG L 7 3 | 9089 | -5.88E-02 | 6.95E-06 | 1.94E-05 |
| BN MTG L 4 3 | 9089 | -5.94E-02 | 2.03E-06 | 6.23E-06 |
| BN INS L 6 5 | 9089 | -5.94E-02 | 7.73E-06 | 2.11E-05 |
| BN INS L 6 1 | 9089 | -5.94E-02 | 1.24E-05 | 3.32E-05 |
| BN ITG L 7 2 | 9089 | -5.96E-02 | 1.78E-06 | 5.58E-06 |
| BN Amyg L | 9089 | -5.98E-02 | 1.21E-05 | 3.25E-05 |
| BN PoG L 4 2 | 9089 | -5.99E-02 | 4.71E-06 | 1.34E-05 |
| BN STG R 6 6 | 9089 | -5.99E-02 | 4.30E-06 | 1.25E-05 |
| BN PhG L 6 3 | 9089 | -6.06E-02 | 1.47E-06 | 4.69E-06 |
| BN OrG R 6 2 | 9089 | -6.06E-02 | 1.52E-05 | 3.95E-05 |
| BN STG R 6 1 | 9089 | -6.13E-02 | 2.00E-06 | 6.21E-06 |
| BN PoG L 4 1 | 9089 | -6.17E-02 | 1.27E-06 | 4.08E-06 |
| BN OrG R 6 1 | 9089 | -6.17E-02 | 1.46E-05 | 3.83E-05 |
| BN Tha L | 9089 | -6.17E-02 | 2.74E-08 | 1.16E-07 |
| BN OrG L 6 6 | 9089 | -6.21E-02 | 3.50E-06 | 1.03E-05 |
| BN IPL R 6 6 | 9089 | -6.23E-02 | 2.09E-06 | 6.37E-06 |
| BN OrG R 6 3 | 9089 | -6.29E-02 | 1.33E-05 | 3.53E-05 |
| BN MVOcC L 5 4 | 9089 | -6.31E-02 | 2.93E-06 | 8.72E-06 |
| BN PoG R 4 2 | 9089 | -6.35E-02 | 8.50E-07 | 2.86E-06 |
| BN IPL L 6 3 | 9089 | -6.38E-02 | 1.24E-07 | 4.79E-07 |
| BN ITG L 7 5 | 9089 | -6.38E-02 | 1.45E-07 | 5.48E-07 |
| BN MTG R 4 3 | 9089 | -6.49E-02 | 5.41E-07 | 1.87E-06 |
| BN INS L 6 6 | 9089 | -6.51E-02 | 3.20E-07 | 1.14E-06 |
| BN LOcC L 4 2 | 9089 | -6.54E-02 | 8.11E-08 | 3.27E-07 |
| BN MVOcC L 5 3 | 9089 | -6.59E-02 | 1.27E-07 | 4.87E-07 |
| BN ITG R 7 4 | 9089 | -6.68E-02 | 9.57E-08 | 3.82E-07 |
| BN LOcC L 4 3 | 9089 | -6.70E-02 | 2.04E-07 | 7.32E-07 |
| BN Amyg R | 9089 | -6.71E-02 | 2.85E-06 | 8.59E-06 |
| BN FuG L 3 3 | 9089 | -6.75E-02 | 1.24E-06 | 4.05E-06 |
| BN PrG L 6 5 | 9089 | -6.80E-02 | 1.62E-07 | 6.07E-07 |
| BN MTG R 4 1 | 9089 | -6.82E-02 | 6.01E-07 | 2.06E-06 |
| BN FuG R 3 3 | 9089 | -6.83E-02 | 9.64E-07 | 3.21E-06 |
| BN MTG L 4 2 | 9089 | -6.84E-02 | 6.87E-07 | 2.33E-06 |
| BN SFG R 7 7 | 9089 | -6.85E-02 | 1.25E-06 | 4.05E-06 |
| BN OrG R 6 6 | 9089 | -6.87E-02 | 3.33E-07 | 1.17E-06 |
| BN IPL L 6 6 | 9089 | -7.04E-02 | 7.90E-08 | 3.22E-07 |
| BN MTG L 4 1 | 9089 | -7.11E-02 | 1.78E-07 | 6.51E-07 |
| BN OrG L 6 4 | 9089 | -7.16E-02 | 3.48E-07 | 1.22E-06 |
| BN OrG R 6 4 | 9089 | -7.19E-02 | 1.07E-06 | 3.52E-06 |
| BN Hipp R | 9089 | -7.34E-02 | 1.24E-07 | 4.79E-07 |
| BN IFG R 6 5 | 9089 | -7.35E-02 | 1.29E-08 | 5.71E-08 |
| BN STG R 6 3 | 9089 | -7.38E-02 | 6.18E-08 | 2.58E-07 |
| BN MTG L 4 4 | 9089 | -7.40E-02 | 1.74E-08 | 7.45E-08 |
| BN Hipp L | 9089 | -7.59E-02 | 7.27E-08 | 3.00E-07 |
| cere Left | 9089 | -7.61E-02 | 8.08E-09 | 3.67E-08 |
| BN INS R 6 3 | 9089 | -7.62E-02 | 1.94E-09 | 1.05E-08 |
| BN INS R 6 1 | 9089 | -7.78E-02 | 1.66E-08 | 7.19E-08 |
| BN ITG R 7 3 | 9089 | -7.82E-02 | 9.51E-10 | 5.48E-09 |
| BN LOcC R 4 4 | 9089 | -7.92E-02 | 1.39E-08 | 6.08E-08 |
| BN MTG R 4 2 | 9089 | -7.98E-02 | 3.19E-09 | 1.63E-08 |
| BN ITG L 7 3 | 9089 | -8.04E-02 | 1.80E-09 | 9.88E-09 |
| BN FuG L 3 2 | 9089 | -8.05E-02 | 7.45E-09 | 3.47E-08 |
| cere Right | 9089 | -8.15E-02 | 7.50E-10 | 4.39E-09 |
| BN FuG L 3 1 | 9089 | -8.27E-02 | 5.79E-09 | 2.79E-08 |
| BN FuG R 3 2 | 9089 | -8.35E-02 | 8.02E-09 | 3.67E-08 |
| BN INS R 6 5 | 9089 | -8.35E-02 | 6.56E-10 | 3.90E-09 |
| BN FuG R 3 1 | 9089 | -8.62E-02 | 4.48E-09 | 2.20E-08 |
| BN INS R 6 6 | 9089 | -8.83E-02 | 9.77E-12 | 6.57E-11 |
| BN MTG R 4 4 | 9089 | -8.94E-02 | 1.16E-10 | 7.41E-10 |
| BN OrG L 6 5 | 9089 | -9.33E-02 | 3.33E-09 | 1.68E-08 |
| BN OrG R 6 5 | 9089 | -9.60E-02 | 1.97E-10 | 1.23E-09 |
| BN LOcC L 4 4 | 9089 | -9.95E-02 | 2.33E-13 | 1.72E-12 |
| BN SPL L 5 4 | 9089 | -6.23E-05 | 9.96E-01 | 9.96E-01 |
| BN SPL R 5 2 | 9089 | 1.46E-04 | 9.90E-01 | 9.93E-01 |
| BN SPL L 5 2 | 9089 | 5.82E-04 | 9.61E-01 | 9.72E-01 |
| BN BG L 6 2 | 9089 | 2.46E-03 | 8.25E-01 | 8.53E-01 |
| BN PoG R 4 4 | 9089 | 2.81E-03 | 8.13E-01 | 8.45E-01 |
| BN SFG R 7 4 | 9089 | 2.87E-03 | 8.17E-01 | 8.47E-01 |
| BN PrG L 6 2 | 9089 | 3.03E-03 | 8.02E-01 | 8.36E-01 |
| BN SPL L 5 1 | 9089 | 6.34E-03 | 5.92E-01 | 6.36E-01 |
| BN PrG L 6 4 | 9089 | 9.99E-03 | 3.83E-01 | 4.26E-01 |
| BN BG L 6 5 | 9089 | 1.10E-02 | 3.15E-01 | 3.57E-01 |
| BN BG R 6 5 | 9089 | 1.12E-02 | 3.22E-01 | 3.63E-01 |
| BN PCun L 4 1 | 9089 | 1.21E-02 | 3.22E-01 | 3.63E-01 |
| BN PrG R 6 4 | 9089 | 1.64E-02 | 1.65E-01 | 1.94E-01 |
| BN SPL R 5 1 | 9089 | 1.90E-02 | 1.05E-01 | 1.27E-01 |
| BN PCun R 4 1 | 9089 | 2.31E-02 | 5.91E-02 | 7.47E-02 |

General linear regression analyses were conducted to examine the relationship between the multimorbidity measure. and regional gray matter volumes. The model controlled for the following covariates: sex, age, TDI, qualifications, smoking status, drinking frequency, head size, site information, and scanner bay location. Multiple comparisons were corrected using the FDR method.

**Supplementary Table 13. Association between the transdiagnostic internalizing factor (at baseline) and biomarkers of the cardiovascular, metabolic, immune, respiratory, and musculoskeletal systems.**

| **Feature** | **Number** | **β** | **P-value** | **FDR**  **P-value** | **Category** |
| --- | --- | --- | --- | --- | --- |
| Phosphate | 65832 | 1.09E-02 | 5.07E-03 | 3.78E-02 | Musculoskeletal |
| Calcium | 65832 | -9.90E-03 | 1.33E-02 | 8.44E-02 | Musculoskeletal |
| Anterior thigh fat-free muscle volume (left) | 7998 | -2.53E-02 | 7.17E-05 | 8.39E-04 | Musculoskeletal |
| Posterior thigh fat-free muscle volume (left) | 7998 | -2.44E-02 | 1.79E-04 | 1.91E-03 | Musculoskeletal |
| Posterior thigh fat-free muscle volume (right) | 7998 | -2.49E-02 | 1.19E-04 | 1.35E-03 | Musculoskeletal |
| Total thigh fat-free muscle volume | 7998 | -2.62E-02 | 2.52E-05 | 3.39E-04 | Musculoskeletal |
| Anterior thigh fat-free muscle volume (right) | 7998 | -2.94E-02 | 4.01E-06 | 6.61E-05 | Musculoskeletal |
| Hand grip strength (average) | 65832 | -5.27E-02 | 1.12E-97 | 4.05E-95 | Musculoskeletal |
| Heel bone mineral density (BMD) | 65832 | -4.02E-02 | 6.98E-25 | 8.45E-23 | Musculoskeletal |
| Vitamin D | 65832 | -3.56E-02 | 1.62E-19 | 1.18E-17 | Musculoskeletal |
| Alkaline phosphatase | 65832 | 7.22E-03 | 6.36E-02 | 2.78E-01 | Musculoskeletal |
| Anterior thigh muscle fat infiltration (MFI) (right) | 7998 | 3.11E-02 | 2.58E-03 | 2.28E-02 | Musculoskeletal |
| Muscle fat infiltration | 7998 | 3.00E-02 | 3.28E-03 | 2.77E-02 | Musculoskeletal |
| Anterior thigh muscle fat infiltration (MFI) (left) | 7998 | 2.72E-02 | 7.34E-03 | 5.22E-02 | Musculoskeletal |
| Posterior thigh muscle fat infiltration (MFI) (left) | 7998 | 3.06E-02 | 3.60E-03 | 2.97E-02 | Musculoskeletal |
| Posterior thigh muscle fat infiltration (MFI) (right) | 7998 | 3.24E-02 | 2.03E-03 | 1.84E-02 | Musculoskeletal |
| Weight-to-muscle ratio | 7998 | 5.92E-02 | 6.33E-12 | 2.09E-10 | Musculoskeletal |
| Lipoprotein A | 92177 | -1.43E-04 | 9.66E-01 | 9.97E-01 | Metabolic |
| Glucose | 92177 | -5.38E-03 | 1.10E-01 | 3.79E-01 | Metabolic |
| Apolipoprotein A | 92177 | -1.19E-02 | 5.24E-05 | 6.34E-04 | Metabolic |
| HDL cholesterol | 92177 | -1.68E-02 | 7.88E-09 | 2.04E-07 | Metabolic |
| Glycated haemoglobin (HbA1c) | 92177 | 2.30E-03 | 4.83E-01 | 7.35E-01 | Metabolic |
| Cholesterol | 92177 | 4.42E-03 | 1.77E-01 | 4.77E-01 | Metabolic |
| LDL direct | 92177 | 6.44E-03 | 5.15E-02 | 2.36E-01 | Metabolic |
| Apolipoprotein B | 92177 | 8.36E-03 | 1.13E-02 | 7.57E-02 | Metabolic |
| Triglycerides | 92177 | 2.68E-02 | 9.30E-17 | 4.22E-15 | Metabolic |
| Monocyte count | 129415 | -8.95E-04 | 7.53E-01 | 9.50E-01 | Immune |
| Eosinophil percentage | 129415 | -3.03E-03 | 2.86E-01 | 6.09E-01 | Immune |
| ENR | 129415 | -5.19E-03 | 6.83E-02 | 2.88E-01 | Immune |
| Lymphocyte count | 129415 | -5.35E-03 | 6.02E-02 | 2.70E-01 | Immune |
| Monocyte percentage | 129415 | -6.13E-03 | 2.79E-02 | 1.47E-01 | Immune |
| Lymphocyte percentage | 129415 | -2.61E-02 | 4.35E-20 | 3.95E-18 | Immune |
| Eosinophil count | 129415 | 2.03E-03 | 4.76E-01 | 7.32E-01 | Immune |
| Basophil percentage | 129415 | 3.78E-03 | 1.84E-01 | 4.78E-01 | Immune |
| ELR | 129415 | 4.89E-03 | 8.64E-02 | 3.27E-01 | Immune |
| Basophil count | 129415 | 7.03E-03 | 1.35E-02 | 8.44E-02 | Immune |
| White blood cell (leukocyte) count | 129415 | 9.59E-03 | 6.87E-04 | 6.74E-03 | Immune |
| C-reactive protein | 129415 | 1.25E-02 | 1.11E-05 | 1.62E-04 | Immune |
| Platelet count | 129415 | 1.33E-02 | 1.87E-06 | 3.39E-05 | Immune |
| PLR | 129415 | 1.50E-02 | 1.38E-07 | 3.13E-06 | Immune |
| Neutrophil count | 129415 | 2.04E-02 | 4.42E-13 | 1.61E-11 | Immune |
| NLR | 129415 | 2.16E-02 | 3.34E-14 | 1.35E-12 | Immune |
| SII | 129415 | 2.41E-02 | 3.02E-17 | 1.57E-15 | Immune |
| Neutrophil percentage | 129415 | 2.51E-02 | 1.45E-18 | 8.79E-17 | Immune |
| Ell 3 (%) | 14288 | -3.96E-04 | 9.62E-01 | 9.97E-01 | Cardiovascular |
| WT AHA 7 (mm) | 14288 | -4.16E-04 | 9.51E-01 | 9.95E-01 | Cardiovascular |
| Err AHA 7 (%) | 14288 | -4.35E-04 | 9.58E-01 | 9.97E-01 | Cardiovascular |
| Ecc AHA 10 (%) | 14288 | -8.49E-04 | 9.21E-01 | 9.79E-01 | Cardiovascular |
| Ecc AHA 8 (%) | 14288 | -1.32E-03 | 8.74E-01 | 9.79E-01 | Cardiovascular |
| Err AHA 14 (%) | 14288 | -1.46E-03 | 8.63E-01 | 9.79E-01 | Cardiovascular |
| Ecc Global (%) | 14288 | -1.47E-03 | 8.55E-01 | 9.79E-01 | Cardiovascular |
| AAo distensibility (10-3 mmHg-1) | 14288 | -1.68E-03 | 8.44E-01 | 9.78E-01 | Cardiovascular |
| Err Global (%) | 14288 | -1.73E-03 | 8.30E-01 | 9.78E-01 | Cardiovascular |
| WT AHA 12 (mm) | 14288 | -1.73E-03 | 7.97E-01 | 9.58E-01 | Cardiovascular |
| WT AHA 9 (mm) | 14288 | -1.74E-03 | 7.96E-01 | 9.58E-01 | Cardiovascular |
| WT AHA 11 (mm) | 14288 | -1.96E-03 | 7.74E-01 | 9.58E-01 | Cardiovascular |
| Ecc AHA 5 (%) | 14288 | -2.23E-03 | 7.88E-01 | 9.58E-01 | Cardiovascular |
| WT AHA 3 (mm) | 14288 | -3.38E-03 | 6.70E-01 | 8.87E-01 | Cardiovascular |
| WT AHA 6 (mm) | 14288 | -4.29E-03 | 5.50E-01 | 7.80E-01 | Cardiovascular |
| Err AHA 12 (%) | 14288 | -4.41E-03 | 5.94E-01 | 8.20E-01 | Cardiovascular |
| WT AHA 4 (mm) | 14288 | -5.46E-03 | 4.43E-01 | 7.09E-01 | Cardiovascular |
| WT AHA 10 (mm) | 14288 | -5.54E-03 | 4.05E-01 | 6.94E-01 | Cardiovascular |
| Ecc AHA 12 (%) | 14288 | -5.66E-03 | 4.96E-01 | 7.35E-01 | Cardiovascular |
| Ecc AHA 9 (%) | 14288 | -6.27E-03 | 4.54E-01 | 7.09E-01 | Cardiovascular |
| WT Global (mm) | 14288 | -6.28E-03 | 3.33E-01 | 6.57E-01 | Cardiovascular |
| Err AHA 13 (%) | 14288 | -6.45E-03 | 4.47E-01 | 7.09E-01 | Cardiovascular |
| Err AHA 6 (%) | 14288 | -6.99E-03 | 4.12E-01 | 6.94E-01 | Cardiovascular |
| AAo max area (mm2) | 14288 | -7.00E-03 | 3.71E-01 | 6.78E-01 | Cardiovascular |
| AAo min area (mm2) | 14288 | -7.01E-03 | 3.66E-01 | 6.75E-01 | Cardiovascular |
| WT AHA 14 (mm) | 14288 | -7.38E-03 | 2.88E-01 | 6.09E-01 | Cardiovascular |
| DAo min area (mm2) | 14288 | -7.72E-03 | 2.57E-01 | 5.82E-01 | Cardiovascular |
| Err AHA 15 (%) | 14288 | -8.74E-03 | 2.98E-01 | 6.25E-01 | Cardiovascular |
| WT AHA 1 (mm) | 14288 | -8.83E-03 | 2.39E-01 | 5.61E-01 | Cardiovascular |
| WT AHA 13 (mm) | 14288 | -1.01E-02 | 1.56E-01 | 4.68E-01 | Cardiovascular |
| Ecc AHA 11 (%) | 14288 | -1.03E-02 | 2.18E-01 | 5.35E-01 | Cardiovascular |
| Err AHA 11 (%) | 14288 | -1.04E-02 | 2.08E-01 | 5.24E-01 | Cardiovascular |
| DAo max area (mm2) | 14288 | -1.09E-02 | 1.16E-01 | 3.80E-01 | Cardiovascular |
| Err AHA 1 (%) | 14288 | -1.13E-02 | 1.81E-01 | 4.77E-01 | Cardiovascular |
| LVCO (L/min) | 14288 | -1.23E-02 | 1.17E-01 | 3.80E-01 | Cardiovascular |
| WT AHA 16 (mm) | 14288 | -1.31E-02 | 6.84E-02 | 2.88E-01 | Cardiovascular |
| WT AHA 15 (mm) | 14288 | -1.41E-02 | 4.63E-02 | 2.18E-01 | Cardiovascular |
| Ecc AHA 3 (%) | 14288 | -1.72E-02 | 4.37E-02 | 2.09E-01 | Cardiovascular |
| Err AHA 16 (%) | 14288 | -1.97E-02 | 2.05E-02 | 1.16E-01 | Cardiovascular |
| WT AHA 2 (mm) | 14288 | -2.02E-02 | 1.32E-02 | 8.44E-02 | Cardiovascular |
| LAV min (mL) | 14288 | -2.17E-02 | 1.02E-02 | 6.97E-02 | Cardiovascular |
| LVM (g) | 14288 | -2.21E-02 | 1.35E-04 | 1.48E-03 | Cardiovascular |
| LAV max (mL) | 14288 | -2.94E-02 | 3.92E-04 | 3.95E-03 | Cardiovascular |
| LVSV (mL) | 14288 | -2.99E-02 | 4.25E-05 | 5.32E-04 | Cardiovascular |
| LASV (mL) | 14288 | -3.03E-02 | 2.03E-04 | 2.10E-03 | Cardiovascular |
| LVESV (mL) | 14288 | -3.11E-02 | 6.92E-06 | 1.05E-04 | Cardiovascular |
| RVESV (mL) | 14288 | -3.18E-02 | 8.33E-07 | 1.59E-05 | Cardiovascular |
| RAV min (mL) | 14288 | -3.27E-02 | 1.93E-05 | 2.69E-04 | Cardiovascular |
| LVEDV (mL) | 14288 | -3.44E-02 | 2.46E-07 | 4.97E-06 | Cardiovascular |
| RASV (mL) | 14288 | -3.78E-02 | 5.66E-06 | 8.93E-05 | Cardiovascular |
| RVSV (mL) | 14288 | -3.91E-02 | 4.09E-08 | 9.89E-07 | Cardiovascular |
| RVEDV (mL) | 14288 | -3.93E-02 | 5.41E-10 | 1.51E-08 | Cardiovascular |
| RAV max (mL) | 14288 | -4.05E-02 | 1.85E-07 | 3.95E-06 | Cardiovascular |
| Err AHA 4 (%) | 14288 | 2.20E-04 | 9.78E-01 | 9.98E-01 | Cardiovascular |
| Ecc AHA 6 (%) | 14288 | 2.46E-04 | 9.77E-01 | 9.98E-01 | Cardiovascular |
| DAo distensibility (10-3 mmHg-1) | 14288 | 7.28E-04 | 9.25E-01 | 9.79E-01 | Cardiovascular |
| Ecc AHA 15 (%) | 14288 | 8.06E-04 | 9.25E-01 | 9.79E-01 | Cardiovascular |
| Ecc AHA 16 (%) | 14288 | 1.18E-03 | 8.89E-01 | 9.79E-01 | Cardiovascular |
| WT AHA 8 (mm) | 14288 | 1.43E-03 | 8.35E-01 | 9.78E-01 | Cardiovascular |
| Err AHA 5 (%) | 14288 | 1.58E-03 | 8.49E-01 | 9.78E-01 | Cardiovascular |
| Ell 2 (%) | 14288 | 1.71E-03 | 8.41E-01 | 9.78E-01 | Cardiovascular |
| Ell 1 (%) | 14288 | 1.86E-03 | 8.27E-01 | 9.78E-01 | Cardiovascular |
| Ecc AHA 13 (%) | 14288 | 2.27E-03 | 7.84E-01 | 9.58E-01 | Cardiovascular |
| WT AHA 5 (mm) | 14288 | 2.49E-03 | 7.27E-01 | 9.35E-01 | Cardiovascular |
| Err AHA 10 (%) | 14288 | 2.66E-03 | 7.50E-01 | 9.50E-01 | Cardiovascular |
| RAEF (%) | 14288 | 3.31E-03 | 6.89E-01 | 9.06E-01 | Cardiovascular |
| Ell 4 (%) | 14288 | 4.07E-03 | 6.19E-01 | 8.48E-01 | Cardiovascular |
| Ecc AHA 7 (%) | 14288 | 5.74E-03 | 4.84E-01 | 7.35E-01 | Cardiovascular |
| RVEF (%) | 14288 | 6.26E-03 | 4.38E-01 | 7.09E-01 | Cardiovascular |
| Ecc AHA 14 (%) | 14288 | 6.95E-03 | 4.07E-01 | 6.94E-01 | Cardiovascular |
| Err AHA 9 (%) | 14288 | 7.53E-03 | 3.62E-01 | 6.75E-01 | Cardiovascular |
| Ell 6 (%) | 14288 | 7.61E-03 | 3.66E-01 | 6.75E-01 | Cardiovascular |
| Ecc AHA 1 (%) | 14288 | 8.64E-03 | 3.03E-01 | 6.25E-01 | Cardiovascular |
| Err AHA 8 (%) | 14288 | 9.67E-03 | 2.46E-01 | 5.73E-01 | Cardiovascular |
| Ecc AHA 4 (%) | 14288 | 1.02E-02 | 2.35E-01 | 5.57E-01 | Cardiovascular |
| Ell Global (%) | 14288 | 1.03E-02 | 2.16E-01 | 5.33E-01 | Cardiovascular |
| Err AHA 2 (%) | 14288 | 1.11E-02 | 1.79E-01 | 4.77E-01 | Cardiovascular |
| LVEF (%) | 14288 | 1.20E-02 | 1.46E-01 | 4.43E-01 | Cardiovascular |
| LAEF (%) | 14288 | 1.27E-02 | 1.35E-01 | 4.18E-01 | Cardiovascular |
| Err AHA 3 (%) | 14288 | 1.43E-02 | 8.09E-02 | 3.19E-01 | Cardiovascular |
| Ell 5 (%) | 14288 | 1.95E-02 | 2.22E-02 | 1.22E-01 | Cardiovascular |
| Ecc AHA 2 (%) | 14288 | 1.81E-05 | 9.98E-01 | 9.98E-01 | Cardiovascular |
| FEV1:FVC ratio | 132319 | -3.60E-03 | 1.91E-01 | 4.91E-01 | Respiratory |
| Forced vital capacity (FVC) | 132319 | -9.92E-03 | 2.10E-06 | 3.63E-05 | Respiratory |
| Forced expiratory volume in 1-second (FEV1) | 132319 | -1.27E-02 | 3.60E-10 | 1.09E-08 | Respiratory |
| Peak expiratory flow (PEF) | 132319 | -2.53E-02 | 5.46E-29 | 9.92E-27 | Respiratory |

General linear regression analyses were conducted to examine the relationship between the transdiagnostic internalizing factor (at base line) and multiple body system biomarkers. The model controlled for the following covariates: sex, age, TDI, qualifications, smoking status, and drinking frequency. Multiple comparisons were corrected using the FDR method.

**Supplementary Table 14. Association between the transdiagnostic internalizing factor (at imaging visit) and biomarkers of the cardiovascular and musculoskeletal systems.**

| Feature | Number | β | P-value | FDR P-value | Category |
| --- | --- | --- | --- | --- | --- |
| Err_AHA_9 (%) | 12306 | -8.43E-04 | 9.25E-01 | 9.48E-01 | Cardiovascular |
| Err_AHA_10 (%) | 12306 | -9.55E-04 | 9.15E-01 | 9.48E-01 | Cardiovascular |
| WT_AHA_13 (mm) | 12306 | -1.09E-03 | 8.87E-01 | 9.48E-01 | Cardiovascular |
| WT_Global (mm) | 12306 | -1.40E-03 | 8.42E-01 | 9.45E-01 | Cardiovascular |
| Ecc_AHA_16 (%) | 12306 | -1.70E-03 | 8.53E-01 | 9.45E-01 | Cardiovascular |
| Ell_2 (%) | 12306 | -1.89E-03 | 8.38E-01 | 9.45E-01 | Cardiovascular |
| Ecc_AHA_9 (%) | 12306 | -1.96E-03 | 8.28E-01 | 9.45E-01 | Cardiovascular |
| Err_AHA_6 (%) | 12306 | -2.09E-03 | 8.21E-01 | 9.45E-01 | Cardiovascular |
| Ell_6 (%) | 12306 | -2.49E-03 | 7.84E-01 | 9.45E-01 | Cardiovascular |
| WT_AHA_4 (mm) | 12306 | -2.71E-03 | 7.24E-01 | 9.22E-01 | Cardiovascular |
| WT_AHA_3 (mm) | 12306 | -2.79E-03 | 7.44E-01 | 9.24E-01 | Cardiovascular |
| Ecc_AHA_12 (%) | 12306 | -3.09E-03 | 7.31E-01 | 9.22E-01 | Cardiovascular |
| WT_AHA_1 (mm) | 12306 | -3.52E-03 | 6.63E-01 | 8.91E-01 | Cardiovascular |
| WT_AHA_16 (mm) | 12306 | -3.74E-03 | 6.30E-01 | 8.90E-01 | Cardiovascular |
| Ecc_AHA_15 (%) | 12306 | -4.05E-03 | 6.61E-01 | 8.91E-01 | Cardiovascular |
| Err_AHA_15 (%) | 12306 | -4.20E-03 | 6.43E-01 | 8.91E-01 | Cardiovascular |
| DAo distensibility (10-3 mmHg-1) | 12306 | -4.22E-03 | 6.14E-01 | 8.90E-01 | Cardiovascular |
| Err_Global (%) | 12306 | -5.50E-03 | 5.24E-01 | 8.11E-01 | Cardiovascular |
| WT_AHA_14 (mm) | 12306 | -5.69E-03 | 4.48E-01 | 7.69E-01 | Cardiovascular |
| Ecc_AHA_6 (%) | 12306 | -6.28E-03 | 4.96E-01 | 8.02E-01 | Cardiovascular |
| Err_AHA_12 (%) | 12306 | -6.58E-03 | 4.60E-01 | 7.69E-01 | Cardiovascular |
| Err_AHA_7 (%) | 12306 | -7.08E-03 | 4.28E-01 | 7.69E-01 | Cardiovascular |
| AAo max area (mm2) | 12306 | -7.47E-03 | 3.77E-01 | 7.53E-01 | Cardiovascular |
| WT_AHA_15 (mm) | 12306 | -7.86E-03 | 3.04E-01 | 7.02E-01 | Cardiovascular |
| Ecc_AHA_11 (%) | 12306 | -8.46E-03 | 3.48E-01 | 7.35E-01 | Cardiovascular |
| DAo min area (mm2) | 12306 | -8.48E-03 | 2.48E-01 | 6.86E-01 | Cardiovascular |
| AAo min area (mm2) | 12306 | -8.53E-03 | 3.08E-01 | 7.02E-01 | Cardiovascular |
| Err_AHA_14 (%) | 12306 | -8.88E-03 | 3.31E-01 | 7.33E-01 | Cardiovascular |
| Err_AHA_13 (%) | 12306 | -9.55E-03 | 2.96E-01 | 7.02E-01 | Cardiovascular |
| Ecc_AHA_3 (%) | 12306 | -1.04E-02 | 2.58E-01 | 6.86E-01 | Cardiovascular |
| Err_AHA_11 (%) | 12306 | -1.07E-02 | 2.30E-01 | 6.73E-01 | Cardiovascular |
| Ecc_AHA_5 (%) | 12306 | -1.12E-02 | 2.10E-01 | 6.50E-01 | Cardiovascular |
| DAo max area (mm2) | 12306 | -1.20E-02 | 1.08E-01 | 4.94E-01 | Cardiovascular |
| Err_AHA_1 (%) | 12306 | -1.41E-02 | 1.21E-01 | 5.08E-01 | Cardiovascular |
| LVM (g) | 12306 | -1.42E-02 | 2.33E-02 | 1.47E-01 | Cardiovascular |
| Err_AHA_16 (%) | 12306 | -1.48E-02 | 1.05E-01 | 4.94E-01 | Cardiovascular |
| WT_AHA_2 (mm) | 12306 | -1.90E-02 | 3.00E-02 | 1.76E-01 | Cardiovascular |
| LAV min (mL) | 12306 | -2.29E-02 | 1.20E-02 | 8.22E-02 | Cardiovascular |
| LVSV (mL) | 12306 | -2.29E-02 | 3.67E-03 | 2.74E-02 | Cardiovascular |
| RVESV (mL) | 12306 | -2.50E-02 | 3.44E-04 | 3.45E-03 | Cardiovascular |
| LVESV (mL) | 12306 | -2.62E-02 | 4.37E-04 | 3.58E-03 | Cardiovascular |
| LVEDV (mL) | 12306 | -2.77E-02 | 1.20E-04 | 1.96E-03 | Cardiovascular |
| RVSV (mL) | 12306 | -3.04E-02 | 7.72E-05 | 1.96E-03 | Cardiovascular |
| RVEDV (mL) | 12306 | -3.07E-02 | 7.35E-06 | 4.59E-04 | Cardiovascular |
| RAV min (mL) | 12306 | -3.14E-02 | 1.43E-04 | 1.96E-03 | Cardiovascular |
| LAV max (mL) | 12306 | -3.18E-02 | 3.78E-04 | 3.45E-03 | Cardiovascular |
| RASV (mL) | 12306 | -3.19E-02 | 3.72E-04 | 3.45E-03 | Cardiovascular |
| LASV (mL) | 12306 | -3.35E-02 | 1.43E-04 | 1.96E-03 | Cardiovascular |
| RAV max (mL) | 12306 | -3.68E-02 | 1.12E-05 | 4.59E-04 | Cardiovascular |
| Err_AHA_8 (%) | 12306 | 1.88E-04 | 9.83E-01 | 9.83E-01 | Cardiovascular |
| WT_AHA_9 (mm) | 12306 | 5.50E-04 | 9.40E-01 | 9.51E-01 | Cardiovascular |
| WT_AHA_10 (mm) | 12306 | 7.64E-04 | 9.15E-01 | 9.48E-01 | Cardiovascular |
| Ecc_AHA_14 (%) | 12306 | 1.02E-03 | 9.10E-01 | 9.48E-01 | Cardiovascular |
| Ecc_Global (%) | 12306 | 1.41E-03 | 8.71E-01 | 9.48E-01 | Cardiovascular |
| Ecc_AHA_8 (%) | 12306 | 1.87E-03 | 8.35E-01 | 9.45E-01 | Cardiovascular |
| Ecc_AHA_13 (%) | 12306 | 1.91E-03 | 8.30E-01 | 9.45E-01 | Cardiovascular |
| WT_AHA_7 (mm) | 12306 | 2.95E-03 | 6.86E-01 | 8.93E-01 | Cardiovascular |
| RVEF (%) | 12306 | 3.59E-03 | 6.80E-01 | 8.93E-01 | Cardiovascular |
| WT_AHA_6 (mm) | 12306 | 3.86E-03 | 6.19E-01 | 8.90E-01 | Cardiovascular |
| WT_AHA_8 (mm) | 12306 | 4.21E-03 | 5.70E-01 | 8.66E-01 | Cardiovascular |
| Ecc_AHA_4 (%) | 12306 | 4.96E-03 | 5.91E-01 | 8.82E-01 | Cardiovascular |
| LVCO (L/min) | 12306 | 5.40E-03 | 5.24E-01 | 8.11E-01 | Cardiovascular |
| WT_AHA_11 (mm) | 12306 | 5.73E-03 | 4.36E-01 | 7.69E-01 | Cardiovascular |
| Ecc_AHA_2 (%) | 12306 | 5.74E-03 | 4.99E-01 | 8.02E-01 | Cardiovascular |
| AAo distensibility (10-3 mmHg-1) | 12306 | 6.14E-03 | 4.53E-01 | 7.69E-01 | Cardiovascular |
| Err_AHA_4 (%) | 12306 | 6.99E-03 | 4.24E-01 | 7.69E-01 | Cardiovascular |
| RAEF (%) | 12306 | 7.40E-03 | 4.06E-01 | 7.69E-01 | Cardiovascular |
| WT_AHA_12 (mm) | 12306 | 7.47E-03 | 3.03E-01 | 7.02E-01 | Cardiovascular |
| Ell_1 (%) | 12306 | 7.97E-03 | 3.86E-01 | 7.53E-01 | Cardiovascular |
| Err_AHA_5 (%) | 12306 | 8.22E-03 | 3.59E-01 | 7.35E-01 | Cardiovascular |
| Ell_3 (%) | 12306 | 8.37E-03 | 3.54E-01 | 7.35E-01 | Cardiovascular |
| Err_AHA_2 (%) | 12306 | 9.78E-03 | 2.72E-01 | 6.98E-01 | Cardiovascular |
| WT_AHA_5 (mm) | 12306 | 1.01E-02 | 1.89E-01 | 6.50E-01 | Cardiovascular |
| Ecc_AHA_10 (%) | 12306 | 1.04E-02 | 2.59E-01 | 6.86E-01 | Cardiovascular |
| Err_AHA_3 (%) | 12306 | 1.11E-02 | 2.11E-01 | 6.50E-01 | Cardiovascular |
| Ell_Global (%) | 12306 | 1.12E-02 | 2.14E-01 | 6.50E-01 | Cardiovascular |
| LVEF (%) | 12306 | 1.16E-02 | 1.92E-01 | 6.50E-01 | Cardiovascular |
| Ell_4 (%) | 12306 | 1.18E-02 | 1.83E-01 | 6.50E-01 | Cardiovascular |
| LAEF (%) | 12306 | 1.22E-02 | 1.86E-01 | 6.50E-01 | Cardiovascular |
| Ell_5 (%) | 12306 | 1.42E-02 | 1.24E-01 | 5.08E-01 | Cardiovascular |
| Ecc_AHA_7 (%) | 12306 | 1.45E-02 | 1.02E-01 | 4.94E-01 | Cardiovascular |
| Ecc_AHA_1 (%) | 12306 | 1.70E-02 | 6.08E-02 | 3.33E-01 | Cardiovascular |
| Posterior thigh fat-free muscle volume (left)-2.0 | 7008 | -1.77E-02 | 1.12E-02 | 1.12E-02 | Musculoskeletal |
| Posterior thigh fat-free muscle volume (right)-2.0 | 7008 | -1.86E-02 | 7.50E-03 | 8.25E-03 | Musculoskeletal |
| Total thigh fat-free muscle volume-2.0 | 7008 | -1.99E-02 | 2.80E-03 | 4.69E-03 | Musculoskeletal |
| Anterior thigh fat-free muscle volume (left)-2.0 | 7008 | -2.18E-02 | 1.50E-03 | 3.29E-03 | Musculoskeletal |
| Anterior thigh fat-free muscle volume (right)-2.0 | 7008 | -2.20E-02 | 1.34E-03 | 3.29E-03 | Musculoskeletal |
| Anterior thigh muscle fat infiltration (MFI) (left)-2.0 | 7008 | 3.04E-02 | 5.02E-03 | 6.14E-03 | Musculoskeletal |
| Posterior thigh muscle fat infiltration (MFI) (left)-2.0 | 7008 | 3.19E-02 | 4.57E-03 | 6.14E-03 | Musculoskeletal |
| Posterior thigh muscle fat infiltration (MFI) (right)-2.0 | 7008 | 3.32E-02 | 2.98E-03 | 4.69E-03 | Musculoskeletal |
| Muscle fat infiltration-2.0 | 7008 | 3.47E-02 | 1.40E-03 | 3.29E-03 | Musculoskeletal |
| Anterior thigh muscle fat infiltration (MFI) (right)-2.0 | 7008 | 3.69E-02 | 8.09E-04 | 3.29E-03 | Musculoskeletal |
| Weight-to-muscle ratio-2.0 | 7008 | 6.44E-02 | 2.24E-12 | 2.46E-11 | Musculoskeletal |

General linear regression analyses were conducted to examine the relationship between the transdiagnostic internalizing factor (at base line) and multiple body system biomarkers. The model controlled for the following covariates: sex, age, TDI, qualifications, smoking status, and drinking frequency. Multiple comparisons were corrected using the FDR method.

**Supplementary Table 15. Association between the** **multimorbidity measure and biomarkers of the cardiovascular, metabolic, immune, respiratory, and musculoskeletal systems.**

| **Feature** | **Number** | **β** | **P-value** | **FDR P-value** | **Category** |
| --- | --- | --- | --- | --- | --- |
| Calcium | 65832 | -8.18E-03 | 2.96E-02 | 4.02E-02 | Musculoskeletal |
| Phosphate | 65832 | -1.08E-02 | 5.05E-03 | 7.80E-03 | Musculoskeletal |
| Vitamin D | 65832 | -1.65E-02 | 1.49E-05 | 3.90E-05 | Musculoskeletal |
| Hand grip strength (average) | 65832 | -3.17E-02 | 1.06E-07 | 4.20E-07 | Musculoskeletal |
| Heel bone mineral density (BMD) | 65832 | 1.58E-02 | 3.87E-05 | 9.56E-05 | Musculoskeletal |
| Alkaline phosphatase | 65832 | 3.85E-02 | 2.04E-23 | 2.05E-22 | Musculoskeletal |
| Anterior thigh fat-free muscle volume (left) | 7998 | 2.18E-02 | 2.67E-01 | 3.05E-01 | Musculoskeletal |
| Anterior thigh fat-free muscle volume (right) | 7998 | 2.50E-02 | 2.02E-01 | 2.36E-01 | Musculoskeletal |
| Total thigh fat-free muscle volume | 7998 | 4.92E-02 | 1.46E-02 | 2.09E-02 | Musculoskeletal |
| Posterior thigh fat-free muscle volume (right) | 7998 | 5.39E-02 | 5.31E-03 | 8.17E-03 | Musculoskeletal |
| Posterior thigh fat-free muscle volume (left) | 7998 | 6.08E-02 | 1.52E-03 | 2.61E-03 | Musculoskeletal |
| Posterior thigh muscle fat infiltration (MFI) (left) | 7998 | 1.12E-01 | 3.97E-21 | 3.51E-20 | Musculoskeletal |
| Posterior thigh muscle fat infiltration (MFI) (right) | 7998 | 1.15E-01 | 3.71E-22 | 3.45E-21 | Musculoskeletal |
| Anterior thigh muscle fat infiltration (MFI) (right) | 7998 | 1.25E-01 | 2.03E-25 | 2.11E-24 | Musculoskeletal |
| Anterior thigh muscle fat infiltration (MFI) (left) | 7998 | 1.29E-01 | 4.47E-26 | 4.92E-25 | Musculoskeletal |
| Muscle fat infiltration | 7998 | 1.31E-01 | 7.19E-27 | 9.00E-26 | Musculoskeletal |
| Weight-to-muscle ratio | 7998 | 1.52E-01 | 3.87E-26 | 4.39E-25 | Musculoskeletal |
| Monocyte percentage | 129415 | -8.10E-04 | 7.68E-01 | 8.09E-01 | Immune |
| Lymphocyte percentage | 129415 | -2.69E-02 | 2.22E-23 | 2.18E-22 | Immune |
| ENR | 129415 | 1.97E-03 | 4.64E-01 | 5.07E-01 | Immune |
| Basophil percentage | 129415 | 6.03E-03 | 2.52E-02 | 3.46E-02 | Immune |
| ELR | 129415 | 6.21E-03 | 2.09E-02 | 2.92E-02 | Immune |
| Eosinophil percentage | 129415 | 6.50E-03 | 1.60E-02 | 2.28E-02 | Immune |
| Basophil count | 129415 | 1.55E-02 | 8.78E-09 | 3.94E-08 | Immune |
| Lymphocyte count | 129415 | 1.57E-02 | 5.84E-09 | 2.79E-08 | Immune |
| Monocyte count | 129415 | 1.61E-02 | 2.67E-09 | 1.38E-08 | Immune |
| Platelet count | 129415 | 1.71E-02 | 5.41E-10 | 3.27E-09 | Immune |
| Neutrophil percentage | 129415 | 2.17E-02 | 6.79E-16 | 5.24E-15 | Immune |
| Eosinophil count | 129415 | 2.45E-02 | 1.31E-19 | 1.13E-18 | Immune |
| NLR | 129415 | 2.85E-02 | 2.56E-26 | 3.00E-25 | Immune |
| SII | 129415 | 3.39E-02 | 1.89E-36 | 2.98E-35 | Immune |
| White blood cell (leukocyte) count | 129415 | 4.47E-02 | 6.54E-61 | 2.37E-59 | Immune |
| Neutrophil count | 129415 | 5.16E-02 | 2.76E-80 | 1.43E-78 | Immune |
| C-reactive protein | 129415 | 6.25E-02 | 2.58E-119 | 3.12E-117 | Immune |
| PLR | 129415 | 5.41E-05 | 9.84E-01 | 9.89E-01 | Immune |
| LDL direct | 92177 | -6.81E-03 | 3.64E-02 | 4.88E-02 | Metabolic |
| Cholesterol | 92177 | -1.51E-02 | 4.36E-06 | 1.26E-05 | Metabolic |
| Apolipoprotein A | 92177 | -5.58E-02 | 1.62E-52 | 4.90E-51 | Metabolic |
| HDL cholesterol | 92177 | -7.19E-02 | 2.74E-84 | 2.48E-82 | Metabolic |
| Lipoprotein A | 92177 | 8.80E-03 | 5.71E-03 | 8.75E-03 | Metabolic |
| Apolipoprotein B | 92177 | 1.04E-02 | 1.49E-03 | 2.57E-03 | Metabolic |
| Glucose | 92177 | 6.13E-02 | 5.72E-82 | 3.89E-80 | Metabolic |
| Triglycerides | 92177 | 6.27E-02 | 5.31E-79 | 2.41E-77 | Metabolic |
| Glycated haemoglobin (HbA1c) | 92177 | 9.92E-02 | 8.87E-202 | 3.22E-199 | Metabolic |
| Err AHA 9 (%) | 14288 | -5.79E-04 | 9.46E-01 | 9.62E-01 | Cardiovascular |
| Err AHA 6 (%) | 14288 | -6.09E-03 | 4.59E-01 | 5.04E-01 | Cardiovascular |
| AAo distensibility (10-3 mmHg-1) | 14288 | -9.14E-03 | 2.68E-01 | 3.05E-01 | Cardiovascular |
| RASV (mL) | 14288 | -9.53E-03 | 2.59E-01 | 2.98E-01 | Cardiovascular |
| Err AHA 10 (%) | 14288 | -1.30E-02 | 1.23E-01 | 1.48E-01 | Cardiovascular |
| Err AHA 11 (%) | 14288 | -1.49E-02 | 7.94E-02 | 9.87E-02 | Cardiovascular |
| Err AHA 7 (%) | 14288 | -1.61E-02 | 5.78E-02 | 7.36E-02 | Cardiovascular |
| Err AHA 12 (%) | 14288 | -2.08E-02 | 1.45E-02 | 2.09E-02 | Cardiovascular |
| RAEF (%) | 14288 | -2.20E-02 | 9.83E-03 | 1.45E-02 | Cardiovascular |
| DAo distensibility (10-3 mmHg-1) | 14288 | -2.38E-02 | 8.69E-03 | 1.29E-02 | Cardiovascular |
| Err AHA 5 (%) | 14288 | -2.66E-02 | 1.62E-03 | 2.77E-03 | Cardiovascular |
| Err Global (%) | 14288 | -2.71E-02 | 1.95E-03 | 3.21E-03 | Cardiovascular |
| Err AHA 1 (%) | 14288 | -2.82E-02 | 7.15E-04 | 1.33E-03 | Cardiovascular |
| RVEF (%) | 14288 | -3.48E-02 | 6.31E-05 | 1.46E-04 | Cardiovascular |
| LVEF (%) | 14288 | -5.08E-02 | 2.48E-09 | 1.32E-08 | Cardiovascular |
| Err AHA 3 (%) | 14288 | -5.90E-02 | 4.71E-12 | 3.22E-11 | Cardiovascular |
| Err AHA 2 (%) | 14288 | -5.96E-02 | 2.19E-12 | 1.53E-11 | Cardiovascular |
| Err AHA 4 (%) | 14288 | -6.18E-02 | 9.87E-13 | 7.03E-12 | Cardiovascular |
| LAEF (%) | 14288 | -1.09E-01 | 3.31E-40 | 6.33E-39 | Cardiovascular |
| Ell 3 (%) | 14288 | 3.58E-04 | 9.66E-01 | 9.74E-01 | Cardiovascular |
| Ecc AHA 11 (%) | 14288 | 3.16E-03 | 7.07E-01 | 7.48E-01 | Cardiovascular |
| Err AHA 15 (%) | 14288 | 4.05E-03 | 6.28E-01 | 6.69E-01 | Cardiovascular |
| Ell 5 (%) | 14288 | 4.27E-03 | 6.04E-01 | 6.45E-01 | Cardiovascular |
| Err AHA 16 (%) | 14288 | 4.32E-03 | 6.02E-01 | 6.45E-01 | Cardiovascular |
| Ecc AHA 16 (%) | 14288 | 5.43E-03 | 5.11E-01 | 5.50E-01 | Cardiovascular |
| RVSV (mL) | 14288 | 6.86E-03 | 4.86E-01 | 5.28E-01 | Cardiovascular |
| Ecc AHA 1 (%) | 14288 | 1.19E-02 | 1.56E-01 | 1.86E-01 | Cardiovascular |
| Ecc AHA 12 (%) | 14288 | 1.35E-02 | 1.09E-01 | 1.32E-01 | Cardiovascular |
| Ell 6 (%) | 14288 | 1.51E-02 | 6.99E-02 | 8.75E-02 | Cardiovascular |
| Err AHA 13 (%) | 14288 | 1.57E-02 | 5.85E-02 | 7.43E-02 | Cardiovascular |
| Err AHA 8 (%) | 14288 | 1.64E-02 | 5.10E-02 | 6.59E-02 | Cardiovascular |
| Ecc AHA 9 (%) | 14288 | 1.66E-02 | 4.79E-02 | 6.22E-02 | Cardiovascular |
| Ecc AHA 15 (%) | 14288 | 1.66E-02 | 4.26E-02 | 5.63E-02 | Cardiovascular |
| Ecc AHA 14 (%) | 14288 | 1.72E-02 | 4.01E-02 | 5.35E-02 | Cardiovascular |
| Err AHA 14 (%) | 14288 | 1.76E-02 | 3.37E-02 | 4.56E-02 | Cardiovascular |
| Ecc AHA 6 (%) | 14288 | 1.86E-02 | 2.35E-02 | 3.25E-02 | Cardiovascular |
| Ell 2 (%) | 14288 | 1.90E-02 | 2.08E-02 | 2.92E-02 | Cardiovascular |
| RAV max (mL) | 14288 | 1.90E-02 | 3.57E-02 | 4.82E-02 | Cardiovascular |
| Ecc AHA 8 (%) | 14288 | 2.84E-02 | 7.22E-04 | 1.33E-03 | Cardiovascular |
| Ecc AHA 10 (%) | 14288 | 2.86E-02 | 4.88E-04 | 9.57E-04 | Cardiovascular |
| Ecc AHA 13 (%) | 14288 | 2.87E-02 | 7.21E-04 | 1.33E-03 | Cardiovascular |
| Ell 4 (%) | 14288 | 2.88E-02 | 8.01E-04 | 1.46E-03 | Cardiovascular |
| Ecc AHA 7 (%) | 14288 | 3.27E-02 | 1.30E-04 | 2.84E-04 | Cardiovascular |
| Ecc AHA 4 (%) | 14288 | 3.35E-02 | 4.40E-05 | 1.06E-04 | Cardiovascular |
| Ecc AHA 5 (%) | 14288 | 3.40E-02 | 5.78E-05 | 1.36E-04 | Cardiovascular |
| RVEDV (mL) | 14288 | 3.41E-02 | 2.10E-03 | 3.42E-03 | Cardiovascular |
| RAV min (mL) | 14288 | 3.68E-02 | 6.25E-05 | 1.45E-04 | Cardiovascular |
| LASV (mL) | 14288 | 3.86E-02 | 6.89E-06 | 1.94E-05 | Cardiovascular |
| Ecc AHA 3 (%) | 14288 | 4.83E-02 | 4.23E-09 | 2.10E-08 | Cardiovascular |
| RVESV (mL) | 14288 | 4.93E-02 | 5.66E-06 | 1.61E-05 | Cardiovascular |
| LVSV (mL) | 14288 | 5.03E-02 | 1.68E-07 | 6.23E-07 | Cardiovascular |
| Ell Global (%) | 14288 | 5.09E-02 | 1.43E-09 | 8.11E-09 | Cardiovascular |
| Ecc AHA 2 (%) | 14288 | 5.16E-02 | 6.73E-09 | 3.17E-08 | Cardiovascular |
| Ecc Global (%) | 14288 | 5.19E-02 | 2.50E-09 | 1.32E-08 | Cardiovascular |
| LVCO (L/min) | 14288 | 5.38E-02 | 1.63E-09 | 9.11E-09 | Cardiovascular |
| Ell 1 (%) | 14288 | 5.44E-02 | 4.19E-11 | 2.72E-10 | Cardiovascular |
| WT AHA 2 (mm) | 14288 | 5.45E-02 | 2.51E-10 | 1.54E-09 | Cardiovascular |
| WT AHA 3 (mm) | 14288 | 5.84E-02 | 4.16E-11 | 2.72E-10 | Cardiovascular |
| AAo min area (mm2) | 14288 | 6.59E-02 | 3.09E-13 | 2.24E-12 | Cardiovascular |
| AAo max area (mm2) | 14288 | 6.92E-02 | 1.01E-14 | 7.66E-14 | Cardiovascular |
| WT AHA 1 (mm) | 14288 | 7.90E-02 | 2.76E-17 | 2.28E-16 | Cardiovascular |
| DAo max area (mm2) | 14288 | 8.46E-02 | 7.41E-17 | 5.84E-16 | Cardiovascular |
| DAo min area (mm2) | 14288 | 8.68E-02 | 3.61E-17 | 2.91E-16 | Cardiovascular |
| WT AHA 4 (mm) | 14288 | 9.45E-02 | 7.22E-22 | 6.55E-21 | Cardiovascular |
| LVEDV (mL) | 14288 | 1.04E-01 | 3.15E-23 | 3.01E-22 | Cardiovascular |
| WT AHA 14 (mm) | 14288 | 1.07E-01 | 1.68E-26 | 2.03E-25 | Cardiovascular |
| LAV max (mL) | 14288 | 1.11E-01 | 4.42E-40 | 8.02E-39 | Cardiovascular |
| WT AHA 15 (mm) | 14288 | 1.12E-01 | 9.72E-30 | 1.26E-28 | Cardiovascular |
| WT AHA 13 (mm) | 14288 | 1.12E-01 | 3.32E-30 | 4.47E-29 | Cardiovascular |
| WT AHA 16 (mm) | 14288 | 1.13E-01 | 4.13E-31 | 6.00E-30 | Cardiovascular |
| WT AHA 6 (mm) | 14288 | 1.17E-01 | 4.07E-33 | 6.15E-32 | Cardiovascular |
| LVESV (mL) | 14288 | 1.17E-01 | 8.24E-31 | 1.15E-29 | Cardiovascular |
| WT AHA 5 (mm) | 14288 | 1.27E-01 | 1.87E-38 | 3.23E-37 | Cardiovascular |
| WT AHA 8 (mm) | 14288 | 1.29E-01 | 3.65E-37 | 6.03E-36 | Cardiovascular |
| WT AHA 7 (mm) | 14288 | 1.40E-01 | 6.75E-42 | 1.36E-40 | Cardiovascular |
| LAV min (mL) | 14288 | 1.43E-01 | 1.06E-67 | 4.29E-66 | Cardiovascular |
| WT AHA 11 (mm) | 14288 | 1.46E-01 | 5.42E-46 | 1.16E-44 | Cardiovascular |
| WT AHA 12 (mm) | 14288 | 1.49E-01 | 5.79E-47 | 1.31E-45 | Cardiovascular |
| WT AHA 9 (mm) | 14288 | 1.49E-01 | 3.18E-47 | 7.77E-46 | Cardiovascular |
| WT AHA 10 (mm) | 14288 | 1.51E-01 | 3.21E-47 | 7.77E-46 | Cardiovascular |
| WT Global (mm) | 14288 | 1.63E-01 | 1.20E-51 | 3.35E-50 | Cardiovascular |
| LVM (g) | 14288 | 1.93E-01 | 6.01E-58 | 1.98E-56 | Cardiovascular |
| FEV1:FVC ratio | 132319 | -2.46E-02 | 2.00E-19 | 1.69E-18 | Respiratory |
| Peak expiratory flow (PEF) | 132319 | -3.48E-02 | 1.10E-25 | 1.17E-24 | Respiratory |
| Forced vital capacity (FVC) | 132319 | -6.88E-02 | 6.43E-82 | 3.89E-80 | Respiratory |
| Forced expiratory volume in 1-second (FEV1) | 132319 | -8.67E-02 | 5.12E-122 | 9.30E-120 | Respiratory |

General linear regression analyses were conducted to examine the relationship between the multimorbidity measure and multiple body system biomarkers. The model controlled for the following covariates: sex, age, TDI, qualifications, smoking status, and drinking frequency. Multiple comparisons were corrected using the FDR method.

**Supplementary Table 16. Mediation effects of biomarkers on the associations between the internalizing factor and chronic diseases across six systems.**

| **Disease** | **Biomarker System** | **Sample Number** | **Case Number** | **A -> M (β)** | **A -> M p-value** | **A -> C (HR)** | **A -> C p-value** | **M -> C (HR)** | **M -> C p-value** | **Indirect effect** | **ci lower** | **ci upper** | **p value** | **FDR p** |
| --- | --- | --- | --- | --- | --- | --- | --- | --- | --- | --- | --- | --- | --- | --- |
| Immune and inflammatory | Brain | 9089 | 75 | 0.03 | 1.11E-04 | 1.07 | 5.33E-01 | 0.85 | 2.16E-01 | -0.0043 | -1.24E-02 | 2.41E-03 | 2.28E-01 | 3.43E-01 |
| Immune and inflammatory | Cardiovascular | 14288 | 126 | -0.04 | 1.04E-09 | 1.29 | 2.86E-03 | 1.14 | 2.80E-01 | -0.0049 | -1.41E-02 | 4.25E-03 | 2.74E-01 | 3.61E-01 |
| Immune and inflammatory | Immune | 129415 | 1215 | 0.03 | 6.58E-22 | 1.13 | 1.30E-05 | 1.14 | 9.08E-11 | 0.0037 | 2.46E-03 | 5.31E-03 | 0.00E+00 | 0.00E+00 |
| Immune and inflammatory | Musculoskeletal | 65832 | 644 | -0.05 | 1.64E-56 | 1.13 | 1.56E-03 | 1.00 | 9.57E-01 | 0.0002 | -4.77E-03 | 5.12E-03 | 9.45E-01 | 9.45E-01 |
| Immune and inflammatory | Metabolic | 92177 | 858 | -0.02 | 8.72E-12 | 1.16 | 1.53E-05 | 0.91 | 1.26E-02 | 0.0020 | 3.73E-04 | 3.83E-03 | 1.44E-02 | 2.73E-02 |
| Immune and inflammatory | Respiratory | 132319 | 1213 | -0.02 | 7.66E-18 | 1.12 | 7.59E-05 | 0.89 | 7.34E-03 | 0.0020 | 2.59E-04 | 3.71E-03 | 2.72E-02 | 4.80E-02 |
| Irritable Bowel Syndrome | Brain | 9089 | 116 | 0.03 | 1.11E-04 | 1.45 | 9.67E-06 | 1.06 | 5.99E-01 | 0.0015 | -4.34E-03 | 8.12E-03 | 6.08E-01 | 6.44E-01 |
| Irritable Bowel Syndrome | Cardiovascular | 14288 | 195 | -0.04 | 1.04E-09 | 1.46 | 1.03E-08 | 0.77 | 1.37E-02 | 0.0102 | 1.99E-03 | 1.96E-02 | 1.32E-02 | 2.72E-02 |
| Irritable Bowel Syndrome | Immune | 129415 | 1517 | 0.03 | 6.58E-22 | 1.47 | 1.19E-57 | 1.03 | 2.75E-01 | 0.0007 | -6.37E-04 | 2.08E-03 | 2.80E-01 | 3.61E-01 |
| Irritable Bowel Syndrome | Musculoskeletal | 65832 | 774 | -0.05 | 1.64E-56 | 1.47 | 8.08E-31 | 0.97 | 4.72E-01 | 0.0017 | -2.73E-03 | 6.36E-03 | 4.72E-01 | 5.48E-01 |
| Irritable Bowel Syndrome | Metabolic | 92177 | 1085 | -0.02 | 8.72E-12 | 1.47 | 4.83E-42 | 1.00 | 9.36E-01 | 0.0000 | -1.42E-03 | 1.39E-03 | 9.39E-01 | 9.45E-01 |
| Irritable Bowel Syndrome | Respiratory | 132319 | 1543 | -0.02 | 7.66E-18 | 1.48 | 4.75E-62 | 0.91 | 1.82E-02 | 0.0015 | 3.13E-04 | 2.88E-03 | 1.36E-02 | 2.72E-02 |
| Neurological | Brain | 9089 | 144 | 0.03 | 1.11E-04 | 1.28 | 1.92E-03 | 1.27 | 1.81E-02 | 0.0061 | 1.12E-03 | 1.28E-02 | 1.36E-02 | 2.72E-02 |
| Neurological | Cardiovascular | 14288 | 233 | -0.04 | 1.04E-09 | 1.23 | 1.38E-03 | 1.10 | 2.49E-01 | -0.0037 | -1.05E-02 | 3.03E-03 | 2.66E-01 | 3.61E-01 |
| Neurological | Immune | 129415 | 3602 | 0.03 | 6.58E-22 | 1.19 | 5.94E-25 | 1.11 | 1.09E-12 | 0.0028 | 1.94E-03 | 3.85E-03 | 0.00E+00 | 0.00E+00 |
| Neurological | Musculoskeletal | 65832 | 1870 | -0.05 | 1.64E-56 | 1.17 | 4.96E-12 | 0.88 | 2.50E-05 | 0.0062 | 3.27E-03 | 9.28E-03 | 0.00E+00 | 0.00E+00 |
| Neurological | Metabolic | 92177 | 2530 | -0.02 | 8.72E-12 | 1.19 | 8.96E-18 | 1.02 | 4.82E-01 | -0.0003 | -1.27E-03 | 6.24E-04 | 5.04E-01 | 5.67E-01 |
| Neurological | Respiratory | 132319 | 3597 | -0.02 | 7.66E-18 | 1.19 | 5.07E-26 | 0.88 | 8.95E-08 | 0.0021 | 1.25E-03 | 3.12E-03 | 0.00E+00 | 0.00E+00 |
| Musculoskeletal | Brain | 9089 | 994 | 0.03 | 1.11E-04 | 1.14 | 3.46E-05 | 1.07 | 6.93E-02 | 0.0018 | -1.19E-04 | 4.22E-03 | 6.80E-02 | 1.08E-01 |
| Musculoskeletal | Cardiovascular | 14288 | 1571 | -0.04 | 1.04E-09 | 1.10 | 1.09E-04 | 1.11 | 1.54E-03 | -0.0043 | -7.61E-03 | -1.43E-03 | 2.00E-03 | 5.14E-03 |
| Musculoskeletal | Immune | 129415 | 15367 | 0.03 | 6.58E-22 | 1.10 | 7.04E-33 | 0.99 | 2.76E-01 | -0.0002 | -6.98E-04 | 2.02E-04 | 2.80E-01 | 3.61E-01 |
| Musculoskeletal | Musculoskeletal | 65832 | 8051 | -0.05 | 1.64E-56 | 1.10 | 5.43E-17 | 0.97 | 2.61E-02 | 0.0016 | 1.93E-04 | 3.13E-03 | 2.80E-02 | 4.80E-02 |
| Musculoskeletal | Metabolic | 92177 | 10925 | -0.02 | 8.72E-12 | 1.10 | 8.63E-22 | 0.96 | 6.06E-04 | 0.0007 | 3.03E-04 | 1.27E-03 | 8.00E-04 | 2.22E-03 |
| Musculoskeletal | Respiratory | 132319 | 15490 | -0.02 | 7.66E-18 | 1.11 | 1.72E-35 | 1.01 | 3.99E-01 | -0.0002 | -5.73E-04 | 2.32E-04 | 3.79E-01 | 4.55E-01 |
| Respiratory | Brain | 9089 | 95 | 0.03 | 1.11E-04 | 1.09 | 4.02E-01 | 1.24 | 9.19E-02 | 0.0055 | -4.05E-04 | 1.33E-02 | 6.88E-02 | 1.08E-01 |
| Respiratory | Cardiovascular | 14288 | 143 | -0.04 | 1.04E-09 | 1.24 | 7.52E-03 | 0.93 | 5.17E-01 | 0.0030 | -6.95E-03 | 1.39E-02 | 5.58E-01 | 6.09E-01 |
| Respiratory | Immune | 129415 | 2132 | 0.03 | 6.58E-22 | 1.20 | 2.89E-17 | 1.17 | 6.53E-32 | 0.0045 | 3.22E-03 | 6.10E-03 | 0.00E+00 | 0.00E+00 |
| Respiratory | Musculoskeletal | 65832 | 1110 | -0.05 | 1.64E-56 | 1.21 | 5.99E-11 | 0.88 | 9.37E-04 | 0.0064 | 2.10E-03 | 1.07E-02 | 3.60E-03 | 8.64E-03 |
| Respiratory | Metabolic | 92177 | 1536 | -0.02 | 8.72E-12 | 1.20 | 7.91E-13 | 1.03 | 3.28E-01 | -0.0006 | -1.77E-03 | 6.14E-04 | 3.61E-01 | 4.48E-01 |
| Respiratory | Respiratory | 132319 | 2014 | -0.02 | 7.66E-18 | 1.20 | 2.41E-16 | 0.48 | 1.08E-150 | 0.0125 | 9.59E-03 | 1.57E-02 | 0.00E+00 | 0.00E+00 |
| Cardiometabolic | Brain | 9089 | 1376 | 0.03 | 1.11E-04 | 1.08 | 6.32E-03 | 1.14 | 4.09E-05 | 0.0034 | 1.27E-03 | 6.07E-03 | 4.00E-04 | 1.20E-03 |
| Cardiometabolic | Cardiovascular | 14288 | 2292 | -0.04 | 1.04E-09 | 1.09 | 8.89E-05 | 1.28 | 1.33E-22 | -0.0099 | -1.39E-02 | -6.40E-03 | 0.00E+00 | 0.00E+00 |
| Cardiometabolic | Immune | 129415 | 21898 | 0.03 | 6.58E-22 | 1.10 | 1.03E-45 | 1.07 | 2.67E-26 | 0.0018 | 1.36E-03 | 2.39E-03 | 0.00E+00 | 0.00E+00 |
| Cardiometabolic | Musculoskeletal | 65832 | 11283 | -0.05 | 1.64E-56 | 1.09 | 9.16E-20 | 1.08 | 9.67E-10 | -0.0036 | -4.92E-03 | -2.41E-03 | 0.00E+00 | 0.00E+00 |
| Cardiometabolic | Metabolic | 92177 | 15520 | -0.02 | 8.72E-12 | 1.10 | 5.43E-30 | 0.76 | 2.17E-174 | 0.0053 | 3.84E-03 | 6.89E-03 | 0.00E+00 | 0.00E+00 |
| Cardiometabolic | Respiratory | 132319 | 21939 | -0.02 | 7.66E-18 | 1.10 | 1.09E-45 | 0.86 | 4.41E-55 | 0.0025 | 1.88E-03 | 3.25E-03 | 0.00E+00 | 0.00E+00 |

We conducted a mediation analysis to investigate the role of multiple systems' biological markers in mediating the relationship between the transdiagnostic internalizing factor and various systemic chronic diseases. Each pathway in the model controlled for gender, age, TDI, qualifications, smoking status, and drinking frequency (with three additional covariates for brain-related pathways). Disease status was coded as a binary variable (0/1), and the regression coefficients for the factor-disease and biomarker-disease pathways were estimated using Cox proportional hazards regression, while the factor-biomarker pathways were calculated using ordinary linear regression. Due to the high heterogeneity of diseases in miscellaneous systems, we focused specifically on discussing the biological mechanisms of IBS, which is most closely related to the internalizing disorder factor.

**Supplementary Table 17. Variables used to assess internalizing symptoms.**

| **Depression and anxiety symptoms** | |  |
| --- | --- | --- |
| Field ID | Description | Question |
| 2050 | Frequency of depressed mood in last 2 weeks | Over the past two weeks, how often have you felt down, depressed or hopeless? |
| 2060 | Frequency of unenthusiasm / disinterest in last 2 weeks | Over the past two weeks, how often have you had little interest or pleasure in doing things? |
| 2070 | Frequency of tenseness / restlessness in last 2 weeks | Over the past two weeks, how often have you felt tense, fidgety or restless? |
| 2080 | Frequency of tiredness / lethargy in last 2 weeks | Over the past two weeks, how often have you felt tired or had little energy? |
| **Neurotic personality** | | |
| Field ID | Description | Question |
| 1920 | Mood swings | Does your mood often go up and down? |
| 1930 | Miserableness | Do you ever feel 'just miserable' for no reason? |
| 1940 | Irritability | Are you an irritable person? |
| 1950 | Sensitivity / hurt feelings | Are your feelings easily hurt? |
| 1960 | Fed-up feelings | Do you often feel 'fed-up'? |
| 1970 | Nervous feelings | Would you call yourself a nervous person? |
| 1980 | Worrier / anxious feelings | Are you a worrier? |
| 1990 | Tense / 'highly strung' | Would you call yourself tense or 'highly strung'? |
| 2000 | Worry too long after embarrassment | Do you worry too long after an embarrassing experience? |
| 2010 | Suffer from 'nerves' | Do you suffer from 'nerves'? |
| 2020 | Loneliness, isolation | Do you often feel lonely? |
| 2030 | Guilty feelings | Are you often troubled by feelings of guilt? |
| **Sleep quality** | | |
| Field ID | Description | Question |
| 1160 | Sleep duration | About how many hours sleep do you get in every 24 hours? (please include naps) |
| 1170 | Getting up in morning | On an average day, how easy do you find getting up in the morning? |
| 1180 | Morning/evening person (chronotype) | Do you consider yourself to be? |
| 1190 | Nap during day | Do you have a nap during the day? |
| 1200 | Sleeplessness / insomnia | Do you have trouble falling asleep at night or do you wake up in the middle of the night? |
| 1210 | Snoring | Does your partner or a close relative or friend complain about your snoring? |
| 1220 | Daytime dozing / sleeping | How likely are you to doze off or fall asleep during the daytime when you don't mean to? (e.g. when working, reading or driving) |

**Supplementary Table 18. List of 28 chronic diseases and corresponding ICD-10 codes.**

| **Disease** | **ICD-10 Codes** |
| --- | --- |
| Multiple Sclerosis | ['G35'] |
| Parkinsonism | ['G20', 'G21', 'G23', 'G25', 'G26', 'G22', 'G90'] |
| Dementia | ['F02', 'G31', 'F05', 'F10', 'G30', 'F01', 'I67', 'A81', 'F03', 'F00'] |
| Stroke | ['I64', 'I60', 'I61', 'I63'] |
| Type II Diabetes | ['E11'] |
| Heart failure | ['I50'] |
| Ischemic heart disease | ['I25', 'I22', 'I24', 'I21', 'I20', 'I23'] |
| Hypertensive diseases | ['I10', 'I11', 'I13', 'I12'] |
| Atrial fibrillation | ['I48'] |
| Obesity | ['E65', 'E66', 'E67', 'E68'] |
| COPD | ['J44', 'J43'] |
| Bronchiectasis | ['J47'] |
| Rheumatoid arthritis | ['M05', 'M06'] |
| Psoriatic arthritis | ['L40', 'M07'] |
| chronic enteritis | ['K50', 'K51'] |
| Osteoarthritis | ['M17', 'M16', 'M15', 'M18', 'M19'] |
| Spinal disorders | ['M47', 'M48', 'M50', 'M51'] |
| Osteoporosis | ['M80', 'M81'] |
| Irritable Bowel Syndrome | ['K58'] |
| Cirrhosis | ['K74', 'K70', 'K72'] |
| CKD | ['N18'] |
| Anaemia | ['D50'] |
| Glaucoma | ['H40'] |
| Eczema or Dermatitis | ['L20', 'L21', 'L22', 'L23', 'L24', 'L25', 'L26', 'L27', 'L28', 'L29', 'L30'] |
| Breast Cancer | ['C50'] |
| Prostate Cancer | ['C61'] |
| Colorectal Cancer | ['C18', 'C19', 'C20', 'C21'] |
| Lung Cancer | ['C34'] |

A list of 28 of the most common diseases in middle-aged and older populations and their corresponding ICD-10 codes. To ensure that more cases are included, this study used a relatively broad coding range.

**Supplementary Table 19. Age at onset and sex distribution across 28 chronic diseases.**

| **Disease** | **Case number**  **(Lifetime diagnosis)** | **Onset age**  **(mean, years)** | **Onset age**  **(std, years)** | **Female (%)** |
| --- | --- | --- | --- | --- |
| Multiple Sclerosis | 2515 | 44.61 | 12.47 | 72.13 |
| Parkinsonism | 10262 | 63.49 | 10.84 | 49.74 |
| Dementia | 32191 | 65.06 | 11.7 | 40.1 |
| Stroke | 19104 | 61.65 | 11.85 | 42.53 |
| Type II Diabetes | 43828 | 62.22 | 9.02 | 40.53 |
| Heart failure | 18341 | 67.7 | 8.35 | 35.39 |
| Ischemic heart disease | 62857 | 60.97 | 10.17 | 35.01 |
| Hypertensive diseases | 195107 | 55.62 | 11.55 | 47.67 |
| Atrial fibrillation | 38003 | 66.03 | 8.89 | 36.75 |
| Obesity | 48940 | 60.19 | 10.54 | 54.03 |
| COPD | 27794 | 60.64 | 15.24 | 46.02 |
| Bronchiectasis | 6508 | 62.49 | 16.09 | 56.79 |
| chronic enteritis | 8800 | 48.25 | 16.38 | 51.69 |
| Psoriatic arthritis | 15401 | 44.91 | 19.21 | 50.09 |
| Rheumatoid arthritis | 12714 | 55.73 | 14.86 | 67.52 |
| Osteoarthritis | 127329 | 58.48 | 11.09 | 59.7 |
| Spinal disorders | 63762 | 54.98 | 13.62 | 56.67 |
| Osteoporosis | 25819 | 63.12 | 9.44 | 83.47 |
| Irritable Bowel Syndrome | 34999 | 49.18 | 13.41 | 72.87 |
| Cirrhosis | 5009 | 61.08 | 10.5 | 36.95 |
| CKD | 27545 | 66.75 | 8.2 | 50.39 |
| Anaemia | 30529 | 58.61 | 14.01 | 64.18 |
| Glaucoma | 19347 | 61.81 | 10.77 | 50.96 |
| Eczema or Dermatitis | 75406 | 47.73 | 18.26 | 56.5 |
| Lung Cancer | 5654 | 67.56 | 7.23 | 48.73 |
| Colorectal Cancer | 9479 | 64.87 | 8.16 | 44.71 |
| Prostate Cancer | 13783 | 66.86 | 6.5 | 0.06 |
| Breast Cancer | 17858 | 59.75 | 9.02 | 99.19 |

To ensure that the diseases included in this study are common chronic conditions in the middle-aged and elderly population of the UK Biobank, we analyzed the age distribution of disease onset. Only 28 chronic diseases with an onset age of 45 years or older were retained for analysis. The age of onset and gender distribution of 24 non-cancer diseases were obtained using the ‘First occurrence’, ‘Age when attended assessment centre’, and ‘Sex’ data. For the four types of cancers, the onset time was extracted based on ‘Diagnoses - ICD10’ and ‘Date of first in-patient diagnosis - ICD10’.

**
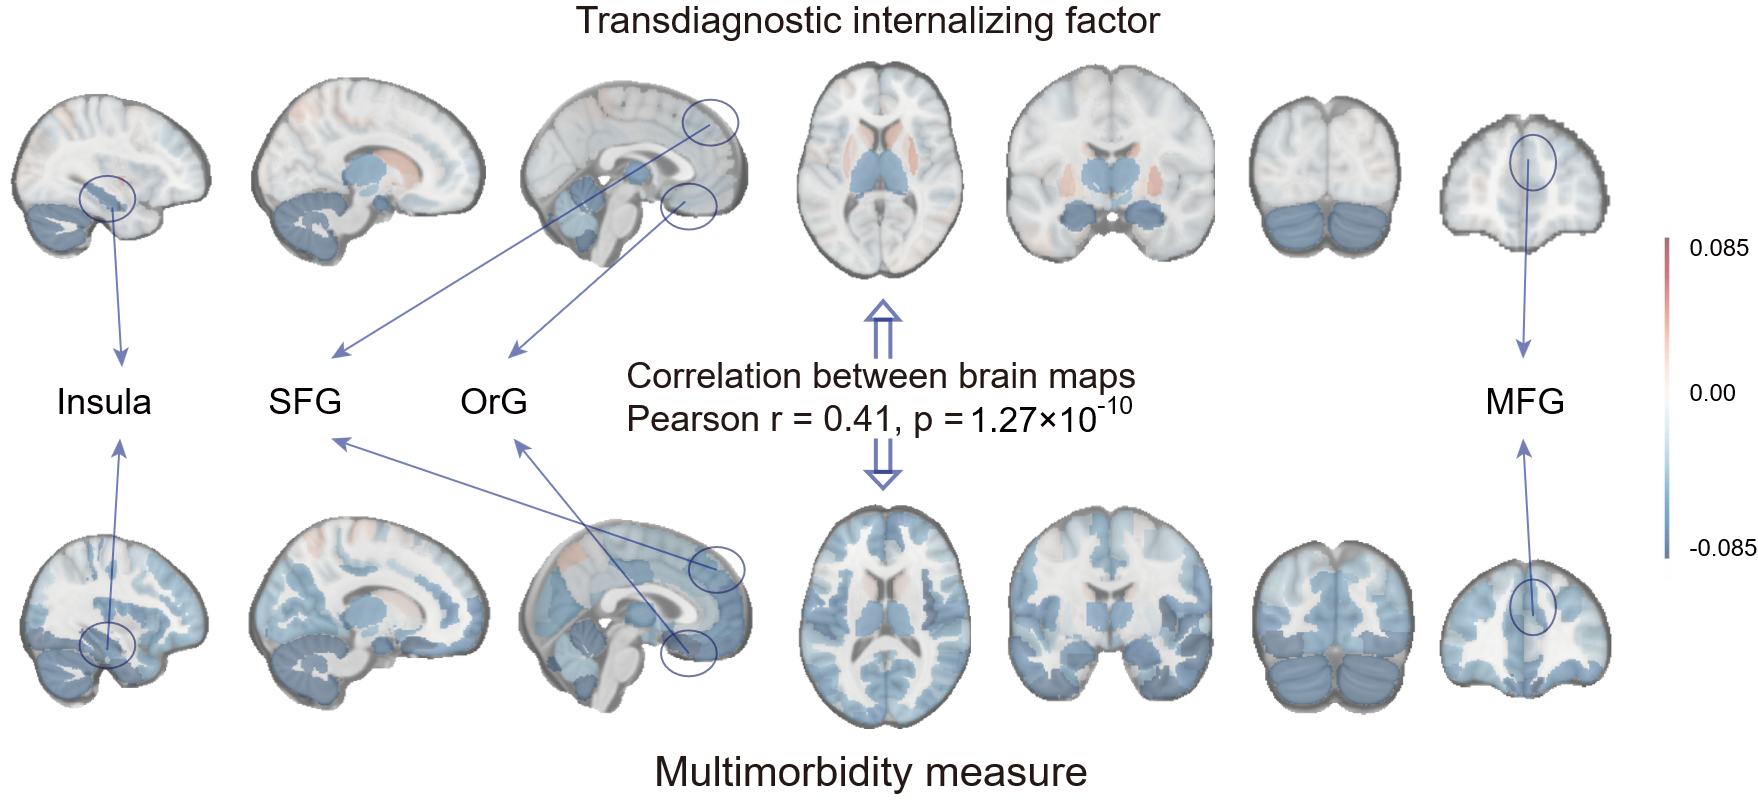
**

**Supplementary Fig. 1. Brain structure associations with the transdiagnostic internalizing factor and the multimorbidity measure.** General linear models were used to examine the associations between brain structure and both the transdiagnostic internalizing factor (top half, n=9,089) and the multimorbidity measure (bottom half, n=9,089), adjusting for sex, age, TDI, education, smoking status, drinking frequency, head size, imaging site, and scanner location. The brain maps for the transdiagnostic internalizing factor and the multimorbidity factor were significantly correlated (r = 0.41, P = 1.27 × 10⁻¹⁰). Regions significantly associated with both factors and chronic diseases after FDR correction are highlighted (SFG, superior frontal gyrus; OrG, orbitofrontal gyrus; MFG, middle frontal gyrus; Insula). Color scale represents association strength. Red indicates a positive association, while blue indicates a negative association.


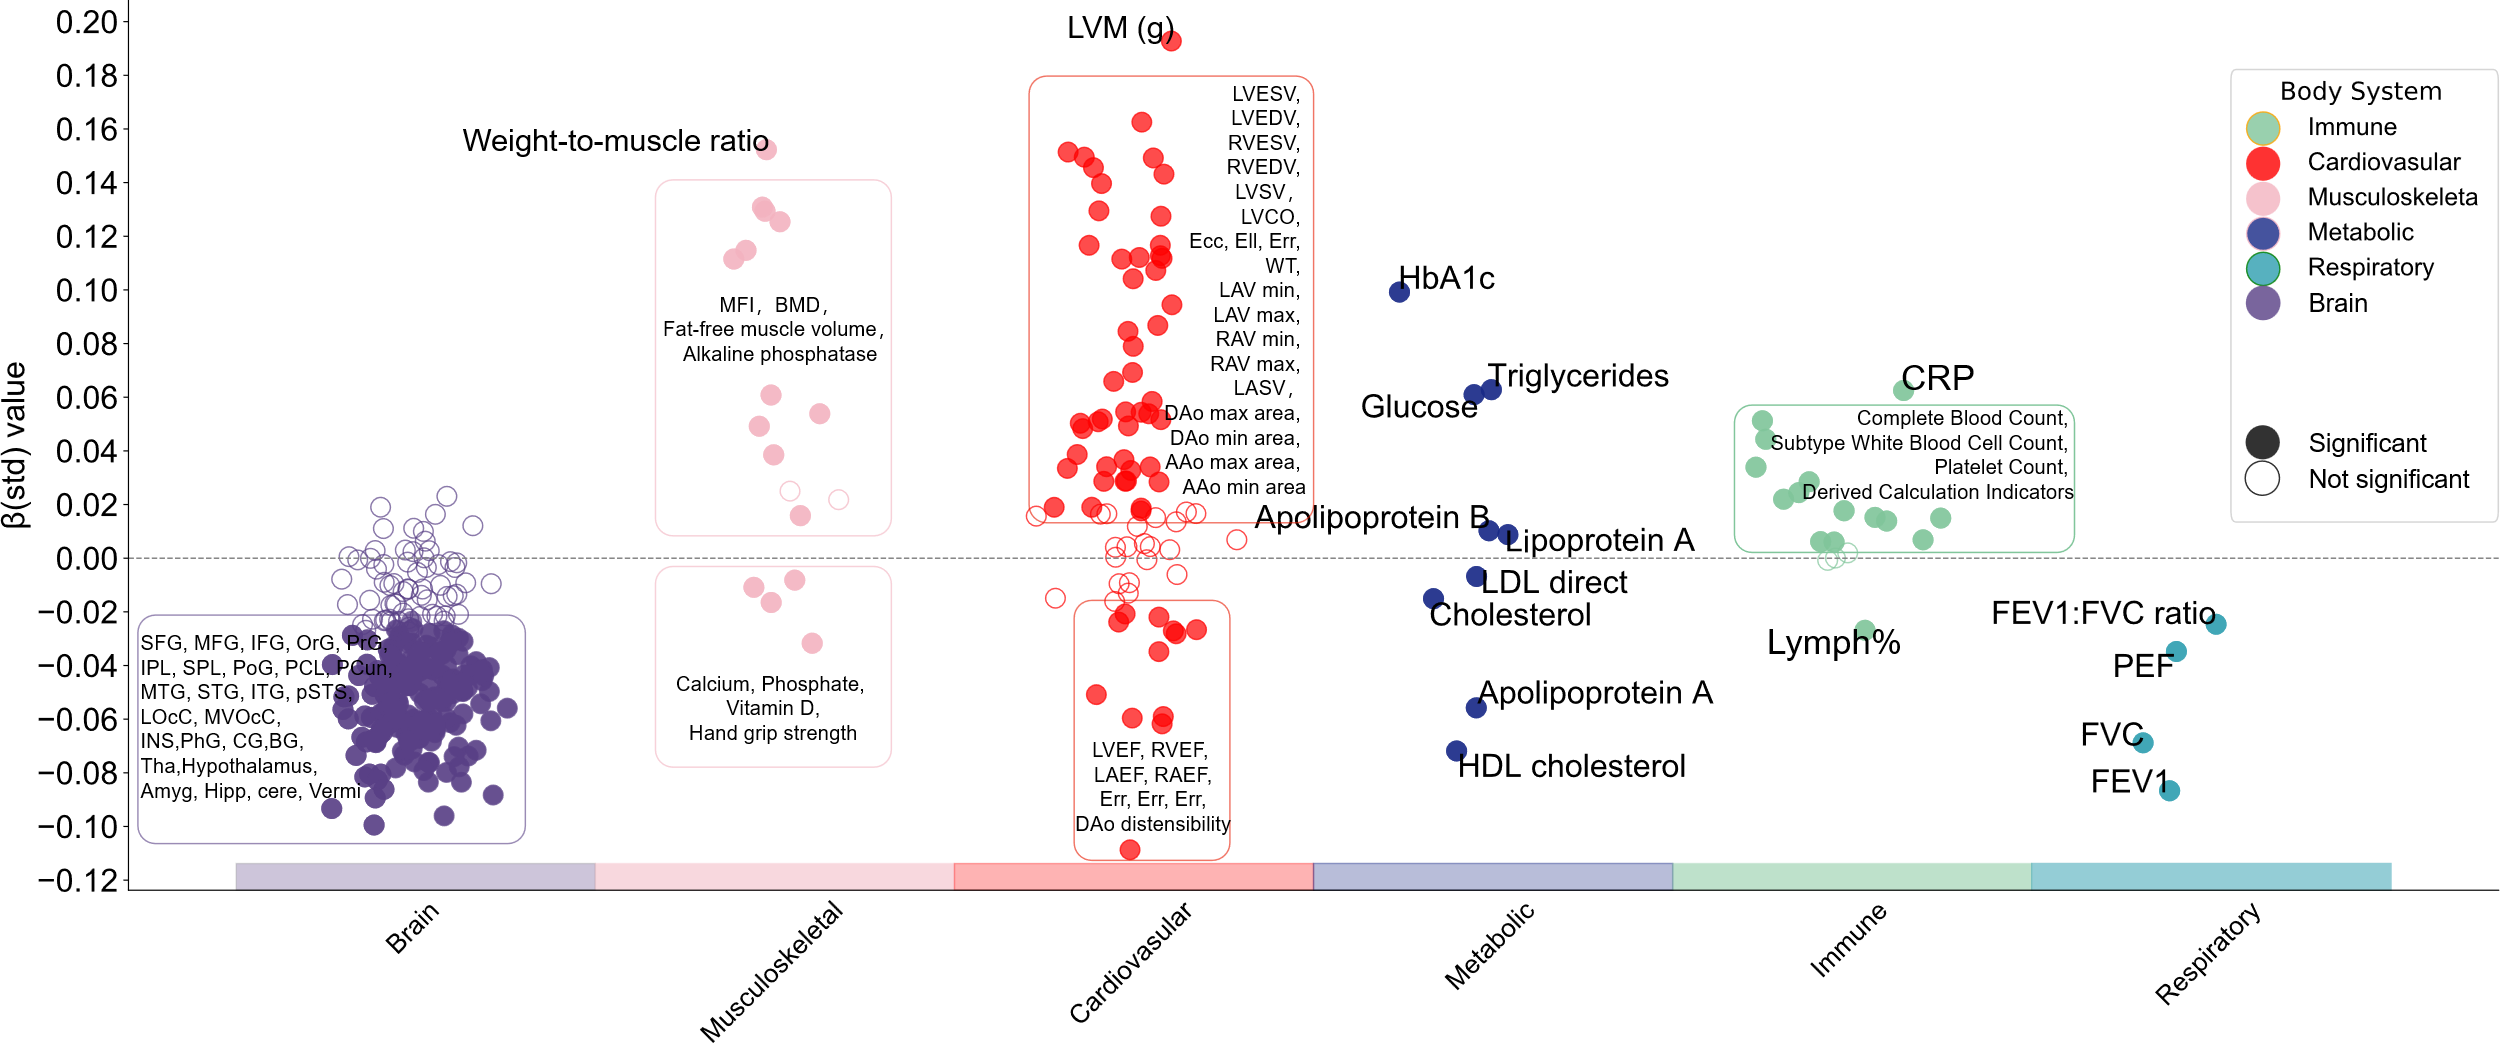


**Supplementary Fig. 2. Association between the multimorbidity measure and multiple system biomarkers.** The β values represent associations between the multimorbidity measure and physiological markers across multiple body systems, controlling for six basic covariates. To compare effect sizes between brain and body systems, results for gray matter volume are displayed on the left. Indicators that remained significant after FDR correction are represented by solid dots and labeled, while non-significant indicators are represented by hollow dots. SFG, superior frontal gyrus; OrG, orbital gyrus; MFG, middle frontal gyrus; vCa, ventral caudate; dCa, dorsal caudate; dPu, dorsal putamen; CRP, c-reactive protein; PLR, platelet-to-lymphocyte ratio; NLR, neutrophil-to-lymphocyte ratio; SII, systemic immune-inflammation index; BMD, bone mineral density; FVC, forced vital capacity; FEV1, forced expiratory volume in 1 second; PEF, peak expiratory flow.


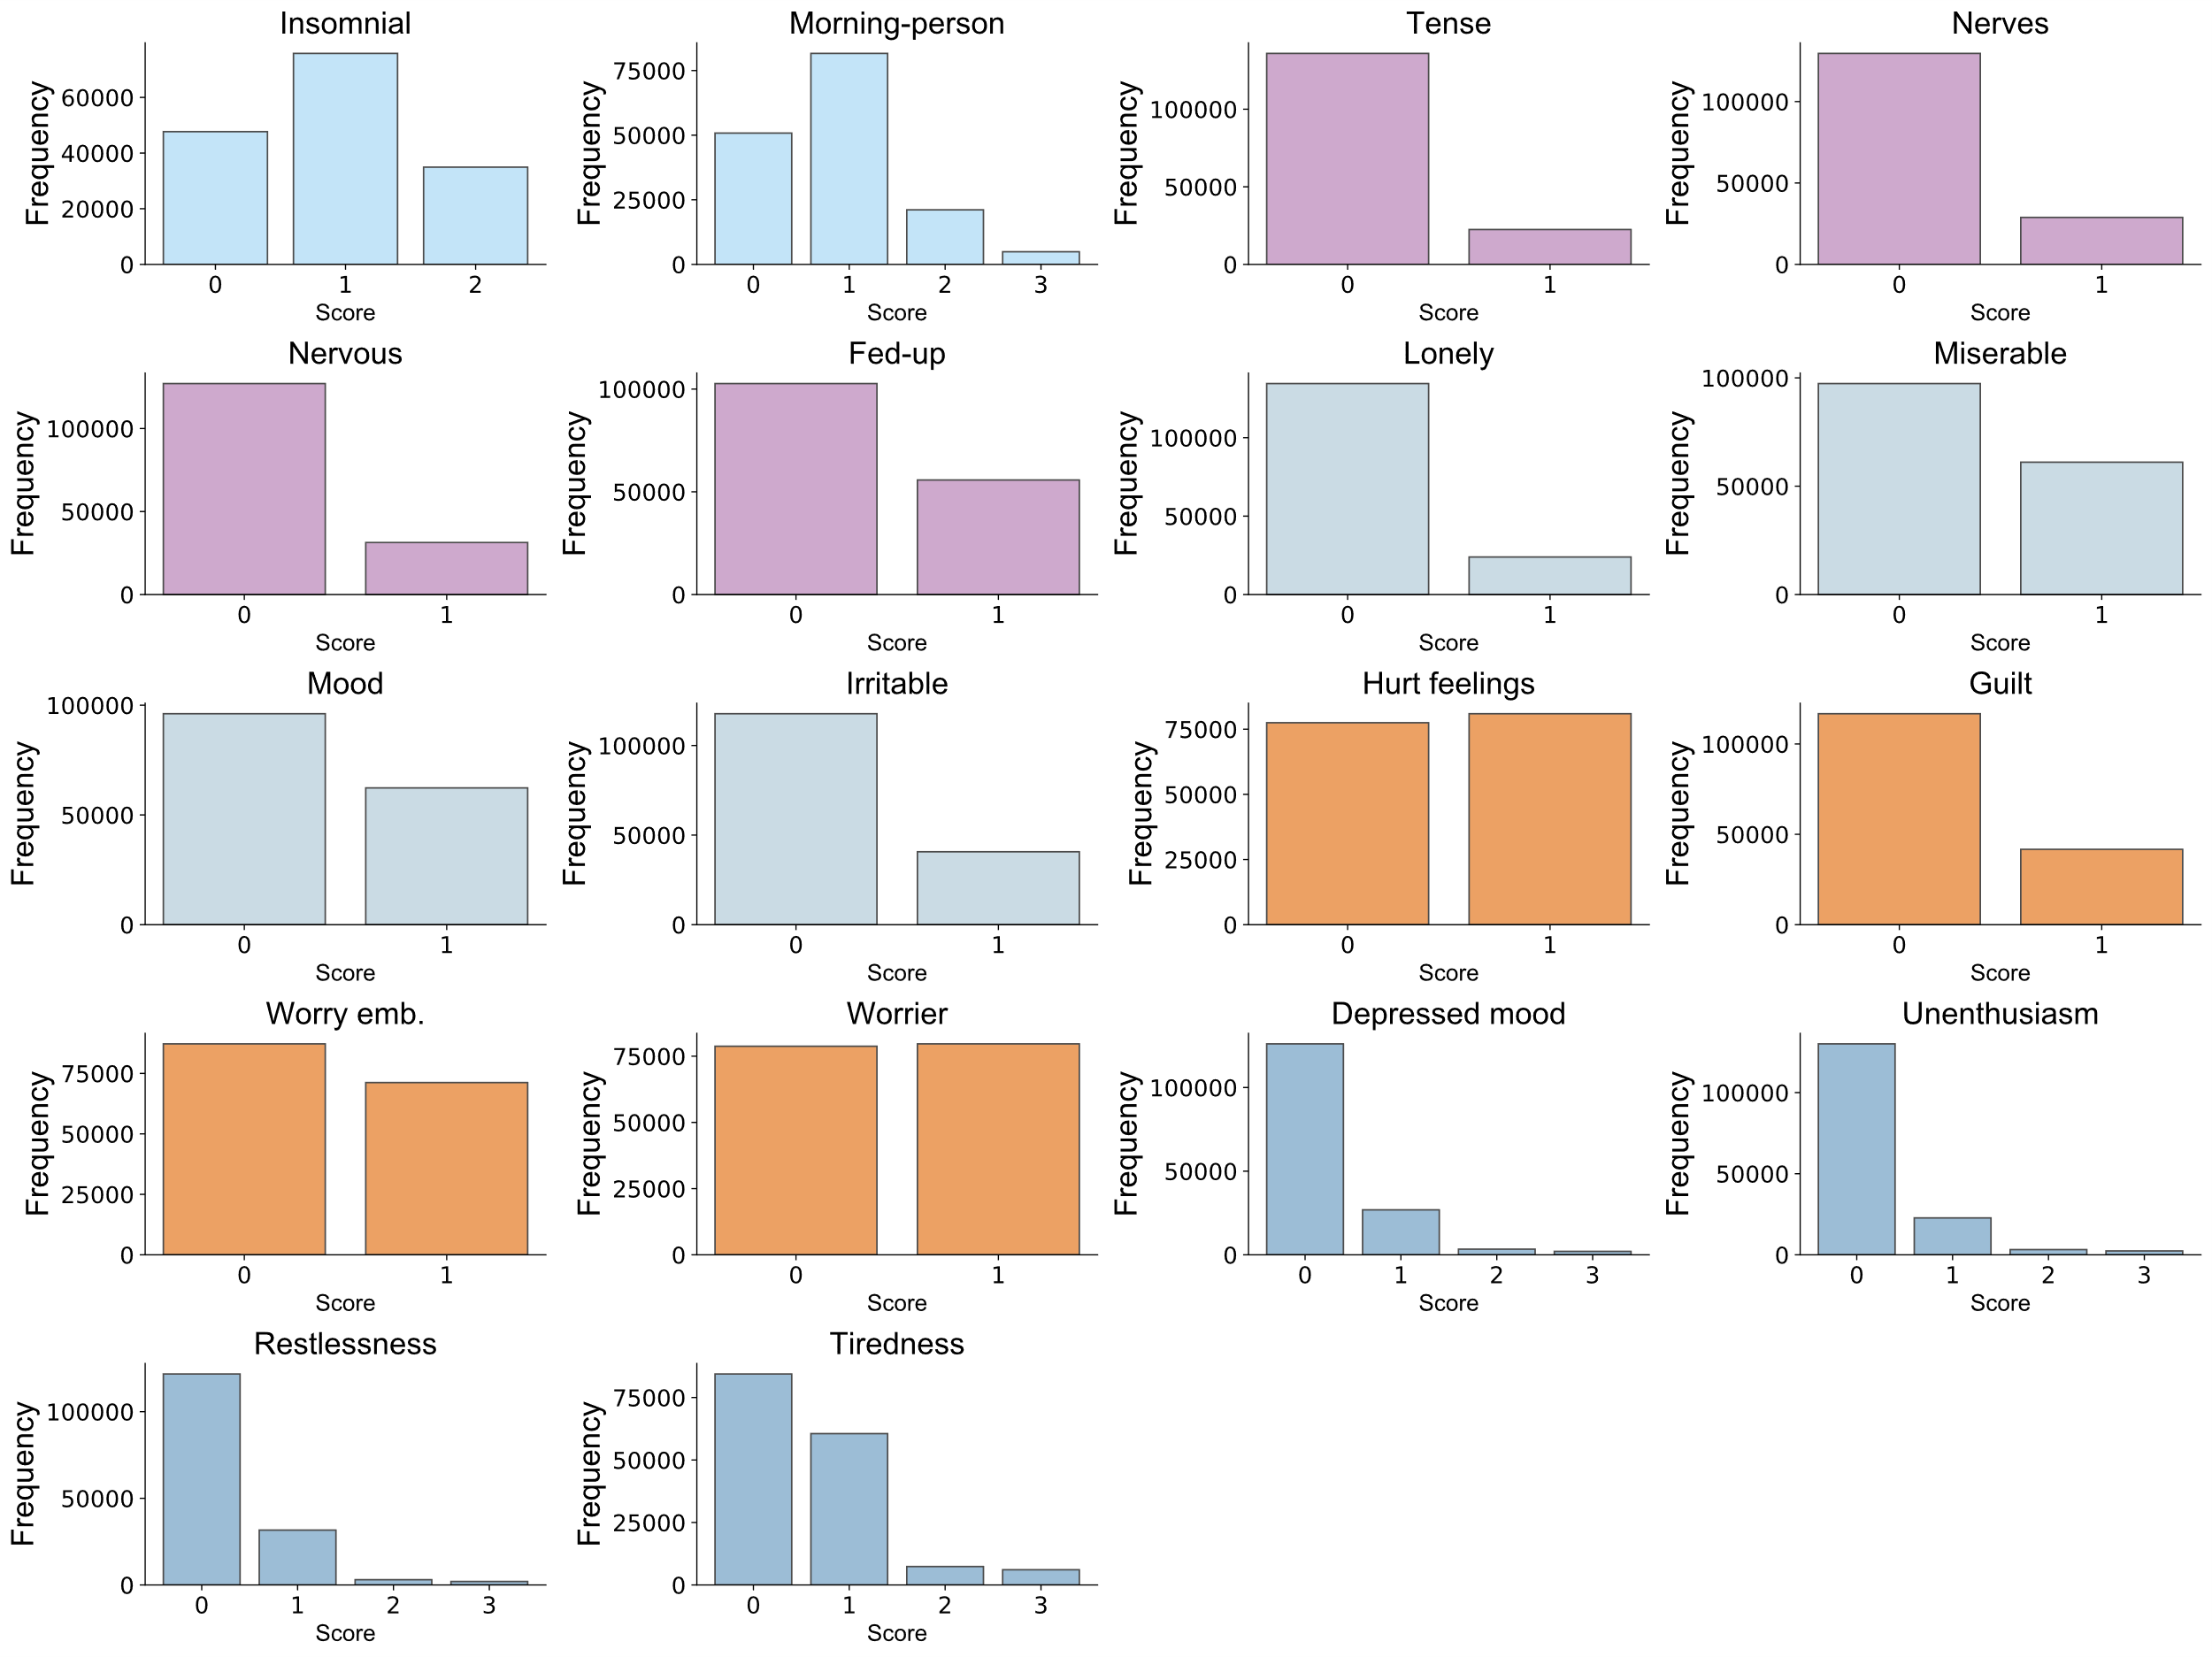
**Supplementary Fig. 3. Score distributions for internalizing symptom items.** This figure visualizes the distribution of scores for the 18 items included in the final version of the transdiagnostic internalizing factor across the population (n = 158,435). Among these, two items assess sleep quality, 12 items are derived from the EPQ-N to evaluate neurotic traits, and four items from the PHQ-4 measure the severity of anxiety and depression.

**References**

1 Petersen, S. E. *et al.* Reference ranges for cardiac structure and function using cardiovascular magnetic resonance (CMR) in Caucasians from the UK Biobank population cohort. *J. Cardiovasc. Magn. Reson.* **19**, 18 (2016).

2 Bai, W. *et al.* Automated cardiovascular magnetic resonance image analysis with fully convolutional networks. *J. Cardiovasc. Magn. Reson.* **20**, 65 (2018).

3 Bai, W. *et al.* in *Medical Image Computing and Computer Assisted Intervention–MICCAI 2018: 21st International Conference, Granada, Spain, September 16-20, 2018, Proceedings, Part IV 11.* 586-594 (Springer).

4 Jennrich, R. I. & Bentler, P. M. Exploratory bi-factor analysis: The oblique case. *Psychometrika* **77**, 442-454 (2012).
